# Supplementary material for: Non-metal Lewis acid-catalyzed cross-Claisen condensation for β-keto esters
Source: Royal Society of Chemistry journal article supplement (doi:10.1039/d1ob01785c), 2021-01-01
Supplement: d1ob01785c1.pdf [file d1ob01785c1.pdf]

## Supporting Information

### Non-Metal Lewis Acid-catalyzed Cross-Claisen Condensation for $\beta$ -Keto Esters

Tianyu Zhang,<sup>1,†</sup> Zhenkun Yang,<sup>1,†</sup> Dapeng Zhou,<sup>\*,2</sup> Fuliang Meng,<sup>2</sup> Zhenyu Han,<sup>\*,1</sup> and Hai Huang<sup>\*,1,2</sup>

<sup>1</sup> *Jiangsu Key Laboratory of Advanced Catalytic Materials & Technology, School of Petrochemical Engineering, Changzhou University, Changzhou (China)*

<sup>2</sup> *Hangmo New Materials Group Co.,Ltd. Anji (China)*

<sup>†</sup> *These authors contributed equally to this work.*

### Table of Contents

|                                                       |     |
|-------------------------------------------------------|-----|
| I. General Information .....                          | S2  |
| II. General Procedure A for $\beta$ -Keto Esters..... | S3  |
| III. Large-Scale Reaction Procedure.....              | S14 |

### NMR spectra

## I. General Information

Flash column chromatography was performed over silica gel (200-300 mesh) purchased from Qindao Puke Co., China. Anhydrous dichloromethane was purified by the Innovative® solvent purification system.  $^1\text{H}$ , and  $^{13}\text{C}$  NMR spectra were collected on a Bruker AV 300 MHz or 400 MHz NMR spectrometer using residue solvent peaks as an internal standard ( $^1\text{H}$  NMR:  $\text{CDCl}_3$  at 7.26 ppm;  $^{13}\text{C}$  NMR:  $\text{CDCl}_3$  at 77.0 ppm). HRMS spectra were performed on a Waters mass spectrometer. IR spectra were recorded on Bruker TENSOR 27 spectrometer and reported in terms of frequency of absorption ( $\text{cm}^{-1}$ ).

## II. General Procedure A for $\beta$ -Keto Esters.

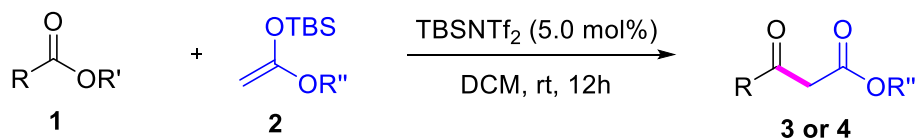

At room temperature, to a mixture of the esters **1** (0.6 mmol) and SKAs **2** (2.0 equiv, 1.2 mmol) was added a solution of TBSNTf<sub>2</sub> in DCM (0.03 mmol, 2.0 mL, 0.015 M).<sup>[1]</sup> The mixture was kept stirring at room temperature for 12 h. The reaction mixture was diluted with dichloromethane (30 mL) and then sequentially washed with an aqueous solution of HCl (10 mL, 1%) and brine (10 mL), dried over anhydrous Na<sub>2</sub>SO<sub>4</sub>, and concentrated in vacuo. The residue was purified by silica gel column chromatography to afford the desired  $\beta$ -keto esters **3-4**.

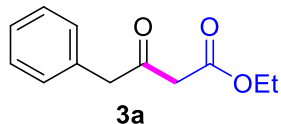

**Ethyl 3-oxo-4-phenylbutanoate (3a)** was prepared according to the General Procedure A as a yellow oil (chromatography eluent: petroleum ether/EtOAc = 4:1) in 78% yield (96.8 mg).

<sup>1</sup>H NMR (300 MHz, CDCl<sub>3</sub>)  $\delta$  7.38-7.28 (m, 3H), 7.25-7.18 (m, 2H), 4.17 (q,  $J$  = 7.2 Hz, 2H), 3.83 (s, 2H), 3.45 (s, 2H), 1.26 (t,  $J$  = 6.9 Hz, 3H) ppm.

<sup>13</sup>C NMR (75 MHz, CDCl<sub>3</sub>)  $\delta$  200.5, 167.1, 133.2, 129.5, 128.8, 127.3, 61.4, 50.0, 48.3, 14.0 ppm.

HRMS (CI<sup>+</sup>) Calcd for C<sub>12</sub>H<sub>15</sub>O<sub>3</sub> [M+H]<sup>+</sup>: 207.1017, Found: 207.1021.

IR (thin film) 2981, 1738, 1713, 1649, 1496, 1454, 1312, 1232, 1029 cm<sup>-1</sup>.

The characteristic data of NMR matched with the reported literature.<sup>[2]</sup>

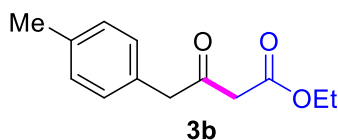

**Ethyl 3-oxo-4-(p-tolyl)butanoate (3b)** was prepared according to the General Procedure A as a yellow oil (chromatography eluent: petroleum ether/EtOAc = 4:1) in 79% yield (104.8 mg).

$^1\text{H NMR}$  (400 MHz,  $\text{CDCl}_3$ )  $\delta$  7.15 (dd,  $J_1 = 8.0$ ,  $J_2 = 2.4$  Hz, 2H), 7.09 (d,  $J = 8.0$  Hz, 2H), 4.17 (q,  $J = 7.2$  Hz, 2H), 3.78 (s, 2H), 3.43 (s, 2H), 2.33 (s, 3H), 1.26 (t,  $J = 7.2$  Hz, 3H) ppm.

$^{13}\text{C NMR}$  (75 MHz,  $\text{CDCl}_3$ )  $\delta$  200.8, 167.1, 137.0, 130.1, 129.5, 129.4, 61.4, 49.7, 48.1, 21.1, 14.0 ppm.

**HRMS** ( $\text{CI}^+$ ) Calcd for  $\text{C}_{13}\text{H}_{17}\text{O}_3$   $[\text{M}+\text{H}]^+$ : 221.1172, Found: 221.1178.

**IR** (thin film) 2980, 1740, 1714, 1650, 1514, 1410, 1312, 1229, 1062  $\text{cm}^{-1}$ .

The characteristic data of NMR matched with the reported literature.<sup>[2]</sup>

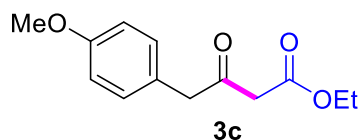

**Ethyl 4-(4-methoxyphenyl)-3-oxobutanoate (3c)** was prepared according to the General Procedure A as a yellow oil (chromatography eluent: petroleum ether/EtOAc = 3:1) in 74% yield (104.4 mg).

$^1\text{H NMR}$  (300 MHz,  $\text{CDCl}_3$ )  $\delta$  7.19-7.08 (m, 2H), 6.92-6.82 (m, 2H), 4.17 (q,  $J = 7.2$  Hz, 2H), 3.79 (s, 3H), 3.76 (s, 2H), 3.43 (s, 2H), 1.26 (t,  $J = 7.2$  Hz, 3H) ppm.

$^{13}\text{C NMR}$  (75 MHz,  $\text{CDCl}_3$ )  $\delta$  200.9, 167.2, 158.8, 130.6, 125.1, 114.2, 61.4, 55.2, 49.1, 48.1, 14.0 ppm.

**HRMS** ( $\text{CI}^+$ ) Calcd for  $\text{C}_{13}\text{H}_{17}\text{O}_4$   $[\text{M}+\text{H}]^+$ : 237.1121, Found: 237.1127.

**IR** (thin film) 2980, 1715, 1610, 1510, 1464, 1301, 1245, 1029  $\text{cm}^{-1}$ .

The characteristic data of NMR matched with the reported literature.<sup>[3]</sup>

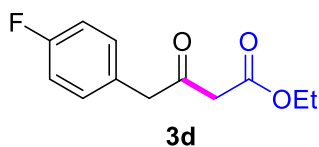

**Ethyl 4-(4-fluorophenyl)-3-oxobutanoate (3d)** was prepared according to the General Procedure A as a yellow oil (chromatography eluent: petroleum ether/EtOAc = 4:1) in 70% yield (94.2 mg).

$^1\text{H NMR}$  (300 MHz,  $\text{CDCl}_3$ )  $\delta$  7.25-7.12 (m, 2H), 7.08-6.96 (m, 2H), 4.18 (q,  $J$  = 6.9 Hz, 2H), 3.81 (s, 2H), 3.46 (s, 2H), 1.26 (t,  $J$  = 7.2 Hz, 3H) ppm.

$^{13}\text{C NMR}$  (75 MHz,  $\text{CDCl}_3$ )  $\delta$  200.3, 167.0, 160.1 (d,  $J$  = 244.5 Hz), 131.1 (d,  $J$  = 7.5 Hz), 128.8 (d,  $J$  = 3.0 Hz), 115.7 (d,  $J$  = 21.8 Hz), 60.5, 48.9, 48.3, 14.0 ppm.

**HRMS** ( $\text{CI}^+$ ) Calcd for  $\text{C}_{12}\text{H}_{14}\text{FO}_3$   $[\text{M}+\text{H}]^+$ : 225.0921, Found: 225.0927.

**IR** (thin film) 2984, 1739, 1714, 1602, 1508, 1314, 1220, 1157, 1028  $\text{cm}^{-1}$ .

The characteristic data of NMR matched with the reported literature.<sup>[2]</sup>

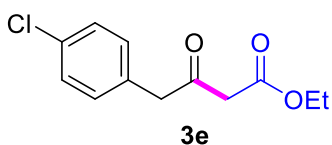

**Ethyl 4-(4-chlorophenyl)-3-oxobutanoate (3e)** was prepared according to the General Procedure A as a yellow oil (chromatography eluent: petroleum ether/EtOAc = 4:1) in 76% yield (109.5 mg).

$^1\text{H NMR}$  (300 MHz,  $\text{CDCl}_3$ )  $\delta$  7.34-7.27 (m, 2H), 7.21-7.10 (m, 2H), 4.18 (q,  $J$  = 6.9 Hz, 2H), 3.82 (s, 2H), 3.46 (s, 2H), 1.27 (t,  $J$  = 7.2 Hz, 3H) ppm.

$^{13}\text{C NMR}$  (75 MHz,  $\text{CDCl}_3$ )  $\delta$  199.9, 167.0, 131.6, 130.9, 128.9, 128.7, 61.5, 49.0, 48.4, 14.1 ppm.

**HRMS** ( $\text{CI}^+$ ) Calcd for  $\text{C}_{12}\text{H}_{14}\text{ClO}_3$   $[\text{M}+\text{H}]^+$ : 241.0626, Found: 241.0631.

**IR** (thin film) 2982, 1735, 1715, 1491, 1407, 1312, 1090, 1028, 1016  $\text{cm}^{-1}$ .

The characteristic data of NMR matched with the reported literature.<sup>[4]</sup>

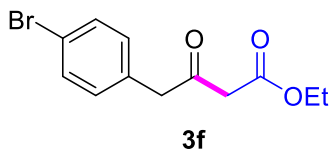

**Ethyl 4-(4-bromophenyl)-3-oxobutanoate (3f)** was prepared according to the General Procedure A as a yellow oil (chromatography eluent: petroleum ether/EtOAc = 4:1) in 80% yield (136.3 mg).

<sup>1</sup>H NMR (300 MHz, CDCl<sub>3</sub>) δ 7.50-7.41 (m, 2H), 7.15-7.04 (m, 2H), 4.18 (q, *J* = 7.2 Hz, 2H), 3.70 (s, 2H), 3.46 (s, 2H), 1.26 (t, *J* = 7.2 Hz, 3H) ppm.

<sup>13</sup>C NMR (75 MHz, CDCl<sub>3</sub>) δ 199.8, 167.0, 132.1, 131.9, 131.3, 121.4, 61.5, 49.1, 48.4, 14.0 ppm.

HRMS (CI<sup>+</sup>) Calcd for C<sub>12</sub>H<sub>14</sub>BrO<sub>3</sub> [M+H]<sup>+</sup>: 285.0121, Found: 285.0126.

IR (thin film) 2981, 1740, 1713, 1488, 1406, 1314, 1259, 1070, 1028 cm<sup>-1</sup>.

The characteristic data of NMR matched with the reported literature.<sup>[5]</sup>

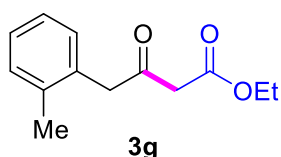

**Ethyl 3-oxo-4-(o-tolyl)butanoate (3g)** was prepared according to the General Procedure A as a yellow oil (chromatography eluent: petroleum ether/EtOAc = 4:1) in 61% yield (80.6 mg).

<sup>1</sup>H NMR (300 MHz, CDCl<sub>3</sub>) δ 7.22-7.19 (m, 2H), 7.19-7.10 (m, 2H), 4.17 (q, *J* = 6.6 Hz, 2H), 3.85 (s, 2H), 3.43 (s, 2H), 2.25 (s, 3H), 1.26 (t, *J* = 6.9 Hz, 3H) ppm.

<sup>13</sup>C NMR (75 MHz, CDCl<sub>3</sub>) δ 200.4, 167.1, 137.1, 132.1, 130.6, 130.5, 127.7, 126.3, 61.4, 48.3, 48.2, 19.6, 14.1 ppm.

HRMS (CI<sup>+</sup>) Calcd for C<sub>13</sub>H<sub>17</sub>O<sub>3</sub> [M+H]<sup>+</sup>: 221.1172, Found: 221.1178.

IR (thin film) 2979, 1739, 1715, 1652, 1462, 1410, 1314, 1225, 1029  $\text{cm}^{-1}$ .

The characteristic data of NMR matched with the reported literature.<sup>[3]</sup>

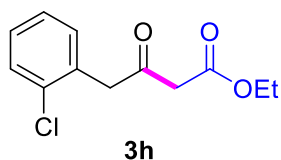

**Ethyl 4-(2-chlorophenyl)-3-oxobutanoate (3h)** was prepared according to the General Procedure A as a yellow oil (chromatography eluent: petroleum ether/EtOAc = 4:1) in 59% yield (84.7 mg).

$^1\text{H NMR}$  (400 MHz,  $\text{CDCl}_3$ )  $\delta$  7.43-7.36 (m, 2H), 7.26-7.21 (m, 2H), 4.19 (q,  $J$  = 6.8 Hz, 2H), 3.98 (s, 2H), 3.51 (s, 2H), 1.27 (t,  $J$  = 7.2 Hz, 3H) ppm.

$^{13}\text{C NMR}$  (75 MHz,  $\text{CDCl}_3$ )  $\delta$  199.2, 167.0, 134.4, 131.9, 131.8, 129.6, 129.0, 127.1, 61.5, 48.7, 47.6, 14.1 ppm.

**HRMS** ( $\text{Cl}^+$ ) Calcd for  $\text{C}_{12}\text{H}_{14}\text{ClO}_3$   $[\text{M}+\text{H}]^+$ : 241.0626, Found: 241.0631.

IR (thin film) 2984, 1740, 1716, 1649, 1474, 1444, 1409, 1313, 1275, 1260, 1193, 1028  $\text{cm}^{-1}$ .

The characteristic data of NMR matched with the reported literature.<sup>[6]</sup>

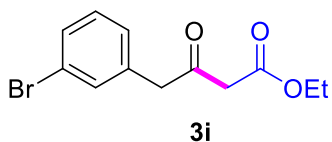

**Ethyl 4-(3-bromophenyl)-3-oxobutanoate (3i)** was prepared according to the General Procedure A as a yellow oil (chromatography eluent: petroleum ether/EtOAc = 4:1) in 44% yield (74.5 mg).

$^1\text{H NMR}$  (300 MHz,  $\text{CDCl}_3$ )  $\delta$  7.46-7.34 (m, 2H), 7.25-7.17 (m, 2H), 4.18 (q,  $J$  = 7.2 Hz, 2H), 3.81 (s, 2H), 3.47 (s, 2H), 1.27 (t,  $J$  = 6.9 Hz, 3H) ppm.

$^{13}\text{C NMR}$  (75 MHz,  $\text{CDCl}_3$ )  $\delta$  199.6, 166.9, 135.3, 132.6, 130.5, 130.3, 128.2, 122.7, 61.6, 49.2, 48.5, 14.1 ppm.

HRMS (CI<sup>+</sup>) Calcd for C<sub>12</sub>H<sub>14</sub>BrO<sub>3</sub> [M+H]<sup>+</sup>: 285.0121, Found: 285.0128.

IR (thin film) 2980, 1738, 1715, 1625, 1568, 1474, 1409, 1314, 1232, 1196, 1028 cm<sup>-1</sup>.

The characteristic data of NMR matched with the reported literature.<sup>[7]</sup>

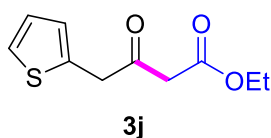

**Ethyl 3-oxo-4-(thiophen-2-yl)butanoate (3j)** was prepared according to the General Procedure A as a yellow oil (chromatography eluent: petroleum ether/EtOAc = 4:1) in 68% yield (86.1 mg).

<sup>1</sup>H NMR (300 MHz, CDCl<sub>3</sub>) δ 7.2-7.23 (m, 1H), 7.02-6.96 (m, 1H), 6.94-6.89 (m, 1H), 4.19 (q, *J* = 7.2 Hz, 2H), 4.04 (s, 2H), 3.50 (s, 2H), 1.27 (t, *J* = 6.9 Hz, 3H) ppm.

<sup>13</sup>C NMR (75 MHz, CDCl<sub>3</sub>) δ 199.2, 167.0, 134.1, 127.4, 127.2, 125.5, 61.5, 47.9, 43.6, 14.1 ppm.

HRMS (CI<sup>+</sup>) Calcd for C<sub>10</sub>H<sub>13</sub>O<sub>3</sub>S [M+H]<sup>+</sup>: 213.0580, Found: 213.0585.

IR (thin film) 2982, 1716, 1651, 1408, 1444, 1367, 1315, 1205, 1156, 1026 cm<sup>-1</sup>.

The characteristic data of NMR matched with the reported literature.<sup>[3]</sup>

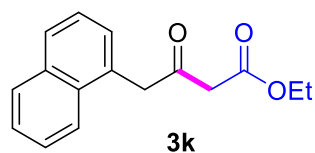

**Ethyl 4-(naphthalen-1-yl)-3-oxobutanoate (3k)** was prepared according to the General Procedure A as a yellow oil (chromatography eluent: petroleum ether/EtOAc = 4:1) in 59% yield (90.7 mg).

<sup>1</sup>H NMR (300 MHz, CDCl<sub>3</sub>) δ 7.93-7.78 (m, 3H), 7.58-7.49 (m, 2H), 7.49-7.36 (m, 2H), 4.27 (s, 2H), 4.14 (q, *J* = 7.2 Hz, 2H), 3.42 (s, 2H), 1.23 (t, *J* = 7.2 Hz, 3H)



ppm.

$^{13}\text{C}$  NMR (75 MHz,  $\text{CDCl}_3$ )  $\delta$  200.9, 167.1, 133.8, 132.1, 129.9, 128.8, 128.5, 128.4, 126.7, 126.0, 125.5, 123.7, 61.4, 48.2, 47.8, 14.0 ppm.

HRMS ( $\text{CI}^+$ ) Calcd for  $\text{C}_{16}\text{H}_{17}\text{O}_3$  [ $\text{M}+\text{H}$ ] $^+$ : 257.1172, Found: 257.1178.

IR (thin film) 2980, 1737, 1713, 1596, 1398, 1366, 1313, 1222, 1192, 1027  $\text{cm}^{-1}$ .

The characteristic data of NMR matched with the reported literature.<sup>[8]</sup>

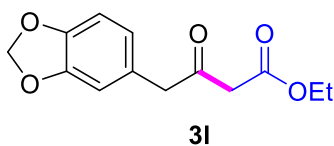

**Ethyl 4-(benzo[d][1,3]dioxol-5-yl)-3-oxobutanoate (3l)** was prepared according to the General Procedure A as a yellow oil (chromatography eluent: petroleum ether/ $\text{EtOAc}$  = 4:1) in 93% yield (139.8 mg).

$^1\text{H}$  NMR (400 MHz,  $\text{CDCl}_3$ )  $\delta$  6.77 (d,  $J$  = 7.6 Hz, 1H), 6.70-6.62 (m, 2H), 5.94 (s, 2H), 4.17 (q,  $J$  = 7.2 Hz, 2H), 3.73 (s, 2H), 3.44 (s, 2H), 1.26 (t,  $J$  = 6.8 Hz, 3H) ppm.

$^{13}\text{C}$  NMR (75 MHz,  $\text{CDCl}_3$ )  $\delta$  200.7, 167.1, 147.9, 146.9, 126.7, 122.7, 109.8, 108.5, 101.1, 61.4, 49.6, 48.1, 14.0 ppm.

HRMS ( $\text{CI}^+$ ) Calcd for  $\text{C}_{13}\text{H}_{15}\text{O}_5$  [ $\text{M}+\text{H}$ ] $^+$ : 251.0914, Found: 251.0919.

IR (thin film) 2979, 1720, 1503, 1488, 1443, 1244, 1187, 1148, 1032  $\text{cm}^{-1}$ .

The characteristic data of NMR matched with the reported literature.<sup>[9]</sup>

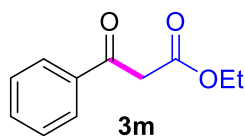

**Ethyl 3-oxo-3-phenylpropanoate (3m)** was prepared according to the General Procedure A as a yellow oil (chromatography eluent: petroleum ether/ $\text{EtOAc}$  = 4:1) in 50% yield (58.1 mg).

$^1\text{H NMR}$  (300 MHz,  $\text{CDCl}_3$ )  $\delta$  7.97-7.91 (m, 2H), 7.64-7.56 (m, 1H), 7.52-7.37 (m, 2H), 4.21 (q,  $J = 7.2$  Hz, 2H), 3.99 (s, 2H), 1.25 (t,  $J = 7.2$  Hz, 3H) ppm.

$^{13}\text{C NMR}$  (75 MHz,  $\text{CDCl}_3$ )  $\delta$  192.5, 167.5, 133.7, 128.8, 128.5, 126.0, 61.5, 46.0, 14.0 ppm.

**HRMS** ( $\text{CI}^+$ ) Calcd for  $\text{C}_{11}\text{H}_{13}\text{O}_3$   $[\text{M}+\text{H}]^+$ : 193.0859, Found: 193.0865.

**IR** (thin film) 2981, 1736, 1684, 1622, 1449, 1263, 1324, 1196, 1144, 1034, 1022  $\text{cm}^{-1}$ .

The characteristic data of NMR matched with the reported literature.<sup>[10]</sup>

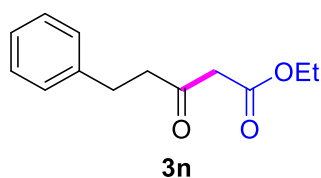

**Ethyl 3-oxo-5-phenylpentanoate (3n)** was prepared according to the General Procedure A as a yellow oil (chromatography eluent: petroleum ether/EtOAc = 4:1) in 79% yield (105.4 mg).

$^1\text{H NMR}$  (400 MHz,  $\text{CDCl}_3$ )  $\delta$  7.32-7.26 (m, 2H), 7.23-7.15 (m, 3H), 4.18 (q,  $J = 7.2$  Hz, 2H), 3.42 (s, 2H), 2.97-2.83 (m, 4H), 1.26 (t,  $J = 7.2$  Hz, 3H) ppm.

$^{13}\text{C NMR}$  (101 MHz,  $\text{CDCl}_3$ )  $\delta$  201.9, 167.1, 140.5, 128.5, 128.3, 126.2, 61.4, 49.4, 44.5, 29.4, 14.1 ppm.

**HRMS** ( $\text{CI}^+$ ) Calcd for  $\text{C}_{13}\text{H}_{17}\text{O}_3$   $[\text{M}+\text{H}]^+$ : 221.1172, Found: 221.1178.

**IR** (thin film) 2979, 1738, 1712, 1454, 1366, 1275, 1260, 1029  $\text{cm}^{-1}$ .

The characteristic data of NMR matched with the reported literature.<sup>[11]</sup>

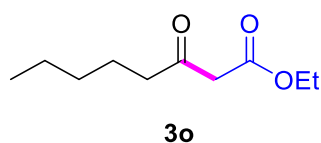

**Ethyl 3-oxooctanoate (3o)** was prepared according to the General Procedure A

as a yellow oil (chromatography eluent: petroleum ether/EtOAc = 4:1) in 78% yield (71.1 mg).

$^1\text{H NMR}$  (300 MHz,  $\text{CDCl}_3$ )  $\delta$  4.18 (q,  $J = 7.2$  Hz, 2H), 3.42 (s, 2H), 2.52 (t,  $J = 7.5$  Hz, 2H), 1.68-1.52 (m, 2H), 1.31-1.23 (m, 7H), 0.88 (t,  $J = 6.6$  Hz, 3H) ppm.

$^{13}\text{C NMR}$  (75 MHz,  $\text{CDCl}_3$ )  $\delta$  203.0, 167.3, 61.3, 49.3, 43.0, 31.1, 23.1, 22.4, 14.1, 13.8 ppm.

**HRMS** ( $\text{CI}^+$ ) Calcd for  $\text{C}_{10}\text{H}_{19}\text{O}_3$   $[\text{M}+\text{H}]^+$ : 187.1329, Found: 187.1334.

**IR** (thin film) 2958, 1740, 1715, 1464, 1367, 1275, 1260, 1150, 1029  $\text{cm}^{-1}$ .

The characteristic data of NMR matched with the reported literature.<sup>[12]</sup>

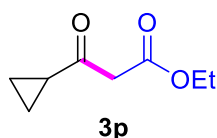

**Ethyl 3-cyclopropyl-3-oxopropanoate (3p)** was prepared according to the General Procedure A as a yellow oil (chromatography eluent: petroleum ether/EtOAc = 4:1) in 58% yield (54.1 mg).

$^1\text{H NMR}$  (300 MHz,  $\text{CDCl}_3$ )  $\delta$  4.18 (q,  $J = 7.2$  Hz, 2H), 3.54 (s, 2H), 2.07-1.96 (s, 1H), 1.25 (t,  $J = 7.2$  Hz, 3H), 1.14-1.05 (m, 2H), 0.98-0.89 (m, 2H) ppm.

$^{13}\text{C NMR}$  (75 MHz,  $\text{CDCl}_3$ )  $\delta$  202.8, 167.2, 61.2, 49.9, 20.7, 14.0, 11.6 ppm.

**HRMS** ( $\text{CI}^+$ ) Calcd for  $\text{C}_8\text{H}_{13}\text{O}_3$   $[\text{M}+\text{H}]^+$ : 157.0859, Found: 157.0865.

**IR** (thin film) 2984, 1736, 1698, 1622, 1383, 1310, 1260, 1144, 1022  $\text{cm}^{-1}$ .

The characteristic data of NMR matched with the reported literature.<sup>[13]</sup>

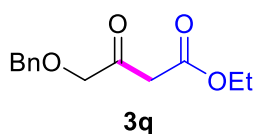

**Ethyl 4-(benzyloxy)-3-oxobutanoate (3q)** was prepared according to the General Procedure A as a yellow oil (chromatography eluent: petroleum

ether/EtOAc = 4:1) in 89% yield (126.7 mg).

$^1\text{H NMR}$  (300 MHz,  $\text{CDCl}_3$ )  $\delta$  7.40-7.27 (m, 5H), 4.58 (s, 2H), 4.24-4.11 (m, 4H), 3.53 (s, 2H), 1.24 (t,  $J = 6.9$  Hz, 7H) ppm.

$^{13}\text{C NMR}$  (75 MHz,  $\text{CDCl}_3$ )  $\delta$  201.6, 166.9, 136.8, 128.4, 128.0, 127.8, 74.7, 73.4, 61.3, 46.0, 13.9 ppm.

**HRMS** ( $\text{CI}^+$ ) Calcd for  $\text{C}_{13}\text{H}_{17}\text{O}_4$   $[\text{M}+\text{H}]^+$ : 237.1121, Found: 237.1127.

**IR** (thin film) 2984, 1719, 1454, 1367, 1317, 1228, 1096, 1028  $\text{cm}^{-1}$ .

The characteristic data of NMR matched with the reported literature.<sup>[14]</sup>

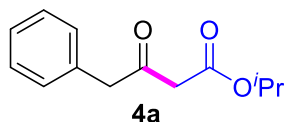

**Isopropyl 3-oxo-4-phenylbutanoate (4a)** was prepared according to the General Procedure A as a yellow oil (chromatography eluent: petroleum ether/EtOAc = 4:1) in 76% yield (103.2 mg).

$^1\text{H NMR}$  (300 MHz,  $\text{CDCl}_3$ )  $\delta$  7.39-7.27 (m, 3H), 7.24-7.16 (m, 2H), 5.11-4.96 (m, 1H), 3.83 (s, 2H), 3.42 (s, 2H), 1.24 (d,  $J = 6.3$  Hz, 6H) ppm.

$^{13}\text{C NMR}$  (75 MHz,  $\text{CDCl}_3$ )  $\delta$  200.6, 166.6, 133.2, 129.6, 128.8, 127.3, 69.1, 50.0, 48.6, 21.7 ppm.

**HRMS** ( $\text{CI}^+$ ) Calcd for  $\text{C}_{13}\text{H}_{17}\text{O}_3$   $[\text{M}+\text{H}]^+$ : 221.1172, Found: 221.1178.

**IR** (thin film) 2980, 1738, 1714, 1641, 1467, 1311, 1239, 1103  $\text{cm}^{-1}$ .

The characteristic data of NMR matched with the reported literature.<sup>[15]</sup>

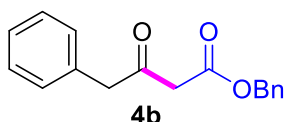

**Benzyl 3-oxo-4-phenylbutanoate (4b)** was prepared according to the General Procedure A as a yellow oil (chromatography eluent: petroleum ether/EtOAc

= 4:1) in 46% yield (73.7 mg).

**<sup>1</sup>H NMR** (300 MHz, CDCl<sub>3</sub>) δ 7.37-7.27 (m, 8H), 7.20-7.12 (m, 2H), 5.15 (s, 2H), 3.81 (s, 2H), 3.52 (s, 2H) ppm.

**<sup>13</sup>C NMR** (75 MHz, CDCl<sub>3</sub>) δ 200.3, 166.9, 135.1, 133.0, 129.5, 128.8, 128.6, 128.5, 128.4, 127.4, 67.2, 50.0, 48.2 ppm.

**HRMS** (CI<sup>+</sup>) Calcd for C<sub>17</sub>H<sub>17</sub>O<sub>3</sub> [M+H]<sup>+</sup>: 269.1172, Found: 269.1178.

**IR** (thin film) 2980, 1740, 1714, 1622, 1454, 1314, 1266, 1190, 1028 cm<sup>-1</sup>.

The characteristic data of NMR matched with the reported literature.<sup>[15]</sup>

### III. Large-Scale Reaction Procedure.

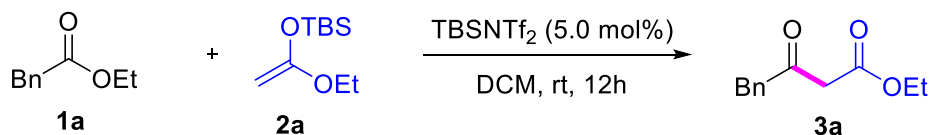

At room temperature, to a mixture of the ethyl 2-phenylacetate **1a** (987 mg, 6.0 mmol) and SKAs **2a** (2.42 g, 12.0 mmol) was added a solution of TBSNTf<sub>2</sub> in DCM (0.3 mmol, 20.0 mL, 0.015 M). The mixture was kept stirring at room temperature for 12 h. The reaction mixture was diluted with dichloromethane (100 mL) and then sequentially washed with an aqueous solution of HCl (50 mL, 1%) and brine (50 mL), dried over anhydrous Na<sub>2</sub>SO<sub>4</sub>, and concentrated in vacuo. The residue was purified by silica gel column chromatography (petroleum ether/EtOAc = 4:1 to 3:1) to afford the desired ethyl 3-oxo-4-phenylbutanoate **3a** (1.05 g, 85%).

### Reference

- [1] W. He, J. Huang, X. Sun, and A. J. Frontier, *J. Am. Chem. Soc.* **2008**, *130*, 300–308.
- [2] T. Terai, K. Kikuchi, S. Iwasawa, T. Kawabe, Y. Hirata, Y. Urano and T. Nagano, *J. Am. Chem. Soc.* **2006**, *128*, 6938-6946.
- [3] F. Wagner, K. Harms and U. Koert, *Org. Lett.* **2015**, *17*, 5670-5673.
- [4] A. Li, Y. Ouyang, Z. Wang, Y. Cao, X. Liu, L. Ran, C. Li, L. Li, L. Zhang, K. Qiao, W. Xu, Y. Huang, Z. Zhang, C. Tian, Z. Liu, S. Jiang, Y. Shao, Y. Du, L. Ma, X. Wang and J. Liu, *J. Med. Chem.* **2013**, *56*, 3593-3608.

- [5] M. Hornum, M. W. Mulberg, M. Szomek, P. Reinholdt, J. R. Brewer, D. Wüstner, J. Kongsted and Poul Nielsen, *J. Org. Chem.* **2021**, *86*, 1471-1488.
- [6] A. Mai, M. Artico, G. Sbardella, S. Massa, E. Novellino, G. Greco, A. G. Loi, E. Tramontano, M. E. Marongiu and P. L. Colla, *J. Med. Chem.* **1999**, *42*, 619-627.
- [7] L. Wang, J. Tang, A. D. Huber, M. C. Casey, K. A. Kirby, D. J. Wilson, J. Kankanala, M. A. Parniak, S. G. Sarafianos and Z. Wang, *Eur. J. Med. Chem.* **2018**, *156*, 680-691.
- [8] A. A. Shimkin, V. Z. Shirinian, A. K. Mailian, D. V. Lonshakov, V. V. Gorokhov and M. M. Krayushkin, *Russian Chem. Bulletin*, **2011**, *60*, 139-142.
- [9] J.-T. Wang, J.-G. Peng, J.-Q. Zhang, Z.-X. Wang, Y. Zhang, X.-R. Zhou, J. Miao and L. Tang, *Bioorg. Med. Chem. Lett.* **2019**, *29*, 126709.
- [10] C. V. Galliford and K. A. Scheidt, *Chem. Commun.* **2008**, *16*, 1926-1928.
- [11] Y. Cao, Y. Zhang, S. Wu, Q. Yang, X. Sun, J. Zhao, F. Pei, Y. Guo, C. Tian, Z. Zhang, H. Wang, L. Ma, J. Liu and X. Wang, *Bioorg. Med. Chem.* **2015**, *23*, 149-159.
- [12] V. T. H. Nguyen, E. Bellur, B. Appel and P. Langer, *Synthesis*, **2006**, *17*, 2865-2872.
- [13] H. Shin, B. S. Choi, K. K. Lee, H. Choi, J. H. Chang, K. W. Lee, D. H. Nam and N.-S. Kim, *Synthesis*, **2004**, *16*, 2629-2632.
- [14] D. Kong, T. Xue, B. Guo, J. Cheng, S. Liu, J. Wei, Z. Lu, H. Liu, G. Gong, T. Lan, W. Hu and Y. Yang, *J. Med. Chem.* **2019**, *62*, 3088-3106.

[15] E. Knobloch and R. Brueckner, *Synthesis*, **2008**, *14*, 2229-2246.



3sjwei 1760 zty-5-7a 1h cdcl3

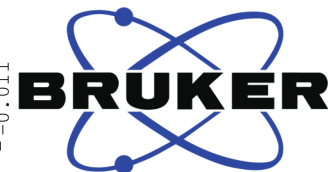

12.136  
7.607  
7.398  
7.392  
7.376  
7.369  
7.364  
7.354  
7.347  
7.341  
7.327  
7.323  
7.312  
7.306  
7.301  
7.292  
7.283  
7.261  
7.244  
7.238  
7.226  
7.221  
7.214  
7.199  
7.199  
4.913  
4.222  
4.206  
4.182  
4.159  
4.135  
4.108  
4.098  
4.043  
3.831  
3.664  
3.615  
3.507  
3.448  
3.365  
3.229  
3.126  
2.155  
1.617  
1.470  
1.457  
1.362  
1.308  
1.283  
1.260  
1.236  
1.226  
1.207  
1.202  
1.184  
1.159  
1.136  
1.128  
1.113  
1.105  
1.082  
1.046  
1.000  
0.880  
0.011  
-0.000  
-0.011

Current Data Parameters  
NAME zty-5-7a-h-fr1  
EXPNO 1  
PROCNO 1

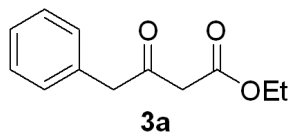

F2 - Acquisition Parameters  
Date\_ 20201110  
Time 20.03  
INSTRUM spect  
PROBHD 5 mm PABBO BB-  
PULPROG zg30  
TD 65536  
SOLVENT CDCl3  
NS 16  
DS 2  
SWH 6009.615 Hz  
FIDRES 0.091699 Hz  
AQ 5.4525952 sec  
RG 161  
DW 83.200 usec  
DE 6.50 usec  
TE 304.6 K  
D1 1.00000000 sec  
TD0 1

==== CHANNEL f1 =====  
SFO1 300.1318534 MHz  
NUC1 1H  
P1 10.00 usec  
PLW1 14.00000000 W

F2 - Processing parameters  
SI 65536  
SF 300.1300071 MHz  
WDW EM  
SSB 0  
LB 0.30 Hz  
GB 0  
PC 1.00

\*Enol isomer

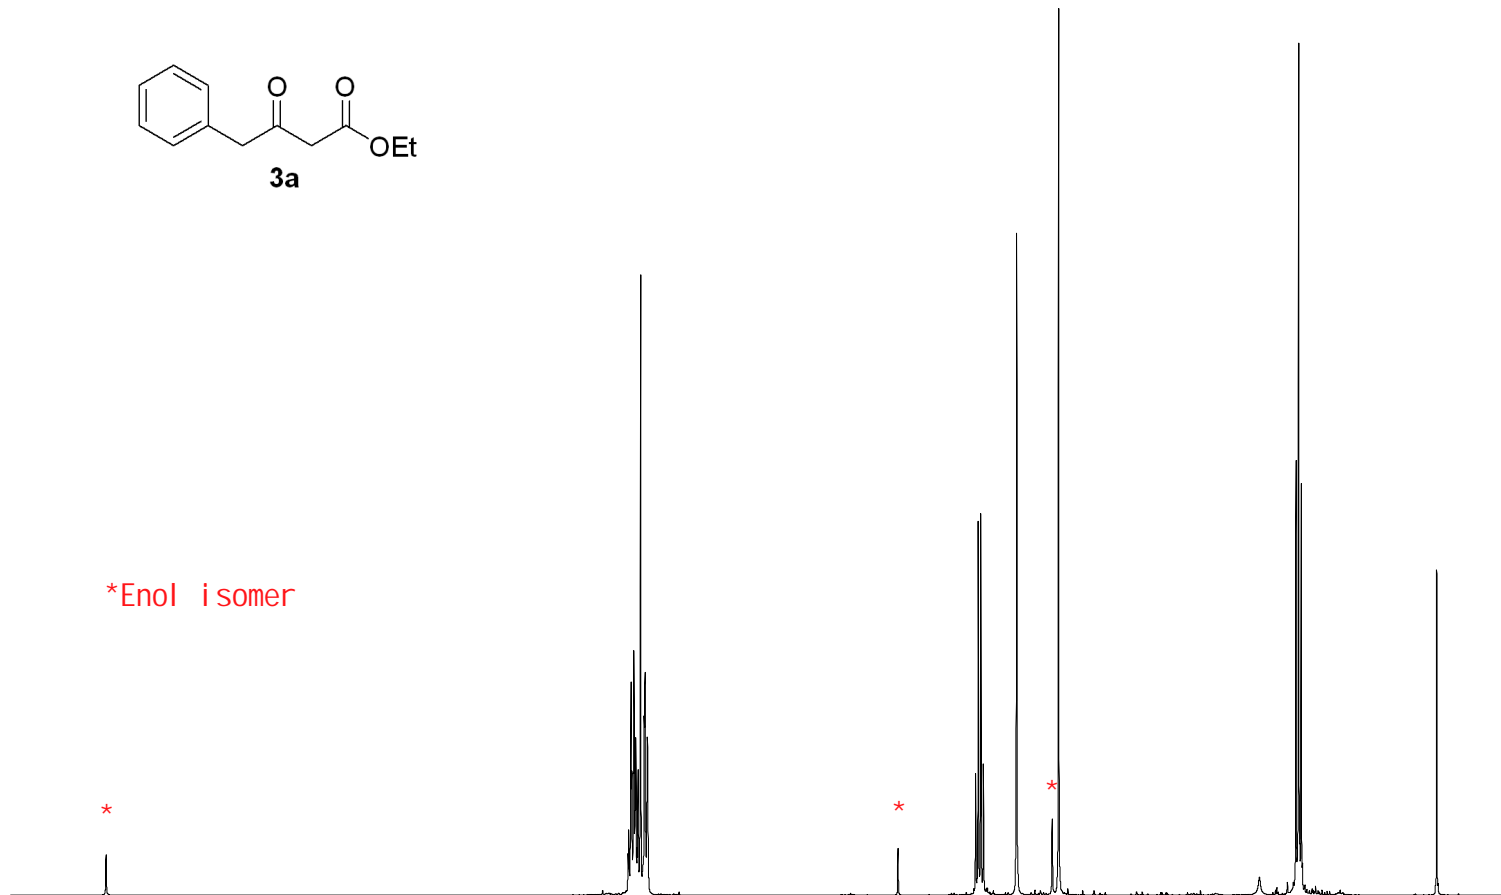

12 11 10 9 8 7 6 5 4 3 2 1 ppm

3.21  
1.96

2.30  
1.99  
2.00

3.42

3sjwei 2150 zty-5-7a 13c cdcl3

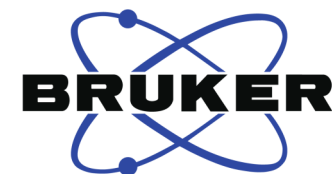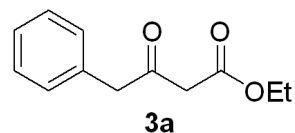

\*Enol isomer

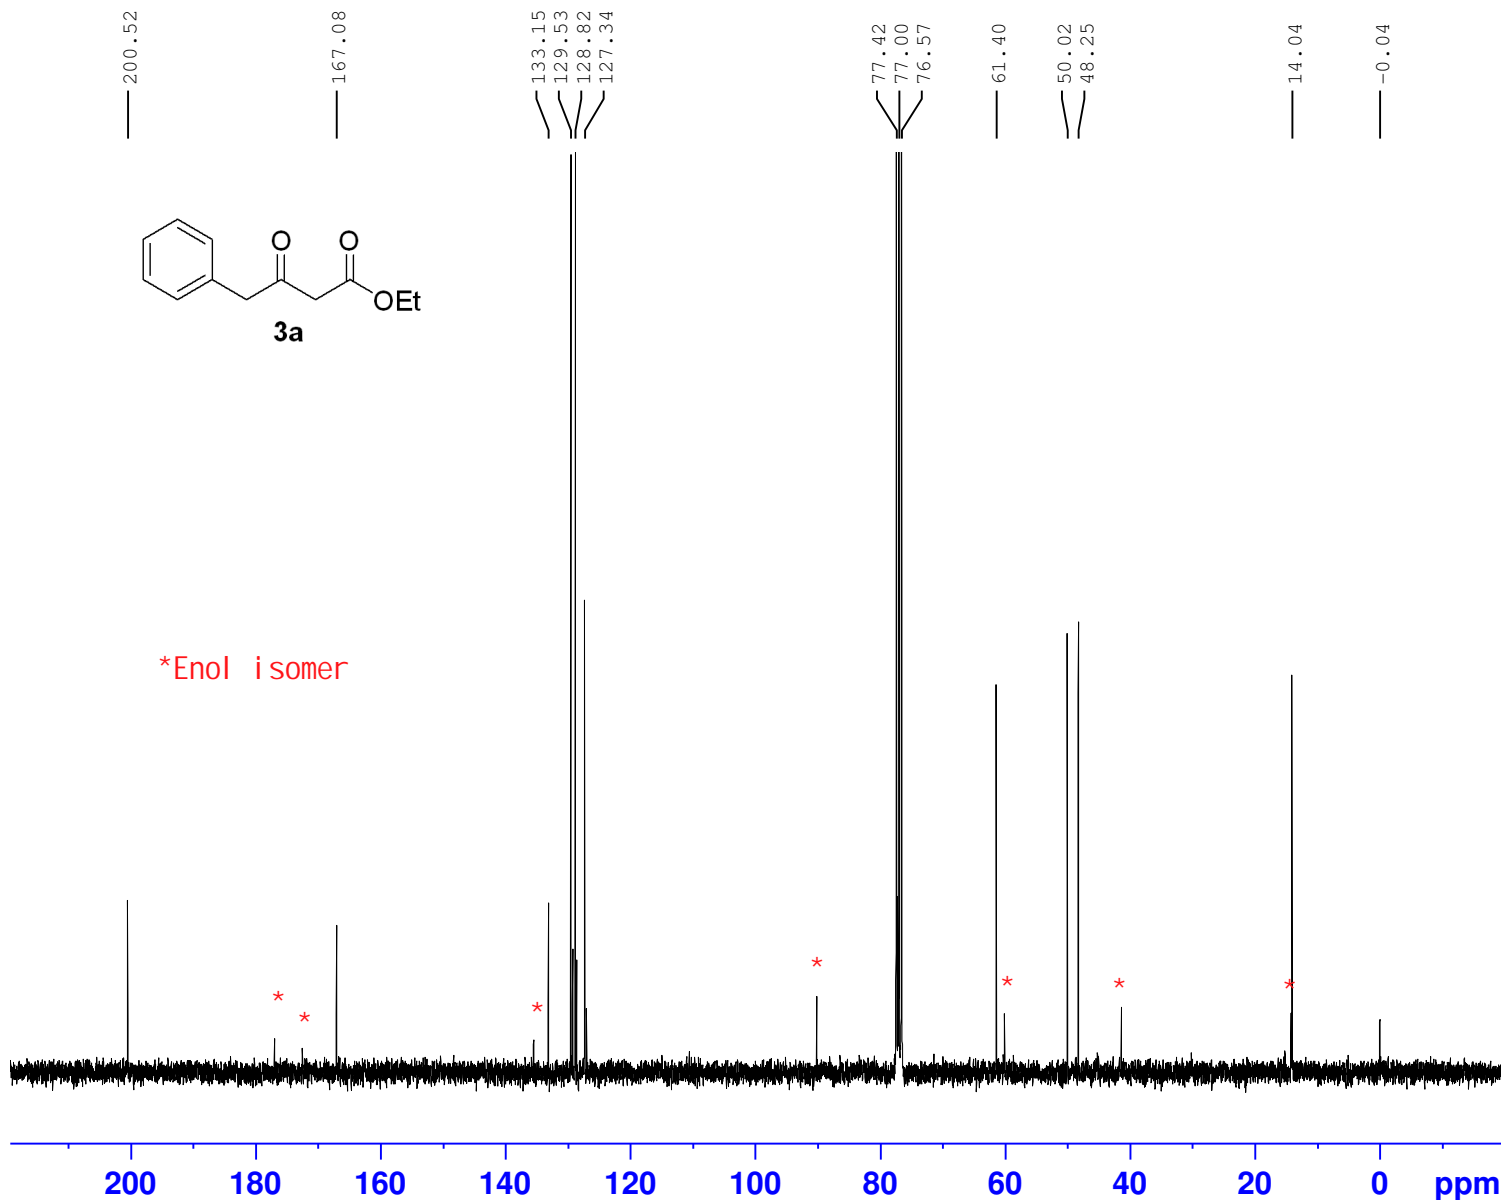

Current Data Parameters  
NAME zty-5-7a-c-frl  
EXPNO 1  
PROCNO 1

F2 - Acquisition Parameters  
Date\_ 20201211  
Time 21.33  
INSTRUM spect  
PROBHD 5 mm PABBO BB-  
PULPROG zgpg30  
TD 65536  
SOLVENT CDCl3  
NS 600  
DS 4  
SWH 18028.846 Hz  
FIDRES 0.275098 Hz  
AQ 1.8175317 sec  
RG 203  
DW 27.733 usec  
DE 6.50 usec  
TE 291.8 K  
D1 2.00000000 sec  
D11 0.03000000 sec  
TD0 1

=====  
CHANNEL f1  
SFO1 75.4752949 MHz  
NUC1 13C  
P1 9.50 usec  
PLW1 34.20000076 W

=====  
CHANNEL f2  
SFO2 300.1312005 MHz  
NUC2 1H  
CPDPRG[2] waltz16  
PCPD2 90.00 usec  
PLW2 14.00000000 W  
PLW12 0.17284000 W  
PLW13 0.14000000 W

F2 - Processing parameters  
SI 32768  
SF 75.4677535 MHz  
WDW EM  
SSB 0  
LB 1.00 Hz  
GB 0  
PC 1.40

4sunjianwei4/155 zty-5-10b

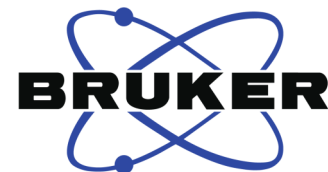

Current Data Parameters  
NAME zty-5-10b-h-fr  
EXPNO 1  
PROCNO 1

F2 - Acquisition Parameters  
Date\_ 20201118  
Time 16.30  
INSTRUM spect  
PROBHD 5 mm PABBO BB-  
PULPROG zg30  
TD 65536  
SOLVENT CDC13  
NS 8  
DS 2  
SWH 8223.685 Hz  
FIDRES 0.125483 Hz  
AQ 3.9845889 sec  
RG 140.02  
DW 60.800 usec  
DE 6.50 usec  
TE 294.6 K  
D1 1.00000000 sec  
TD0 1

==== CHANNEL f1 =====  
NUC1 1H  
P1 14.40 usec  
PLW1 14.00000000 W  
SFO1 400.1924713 MHz

F2 - Processing parameters  
SI 65536  
SF 400.1900159 MHz  
WDW EM  
SSB 0  
LB 0.30 Hz  
GB 0  
PC 1.00

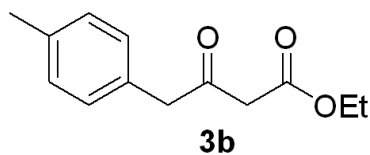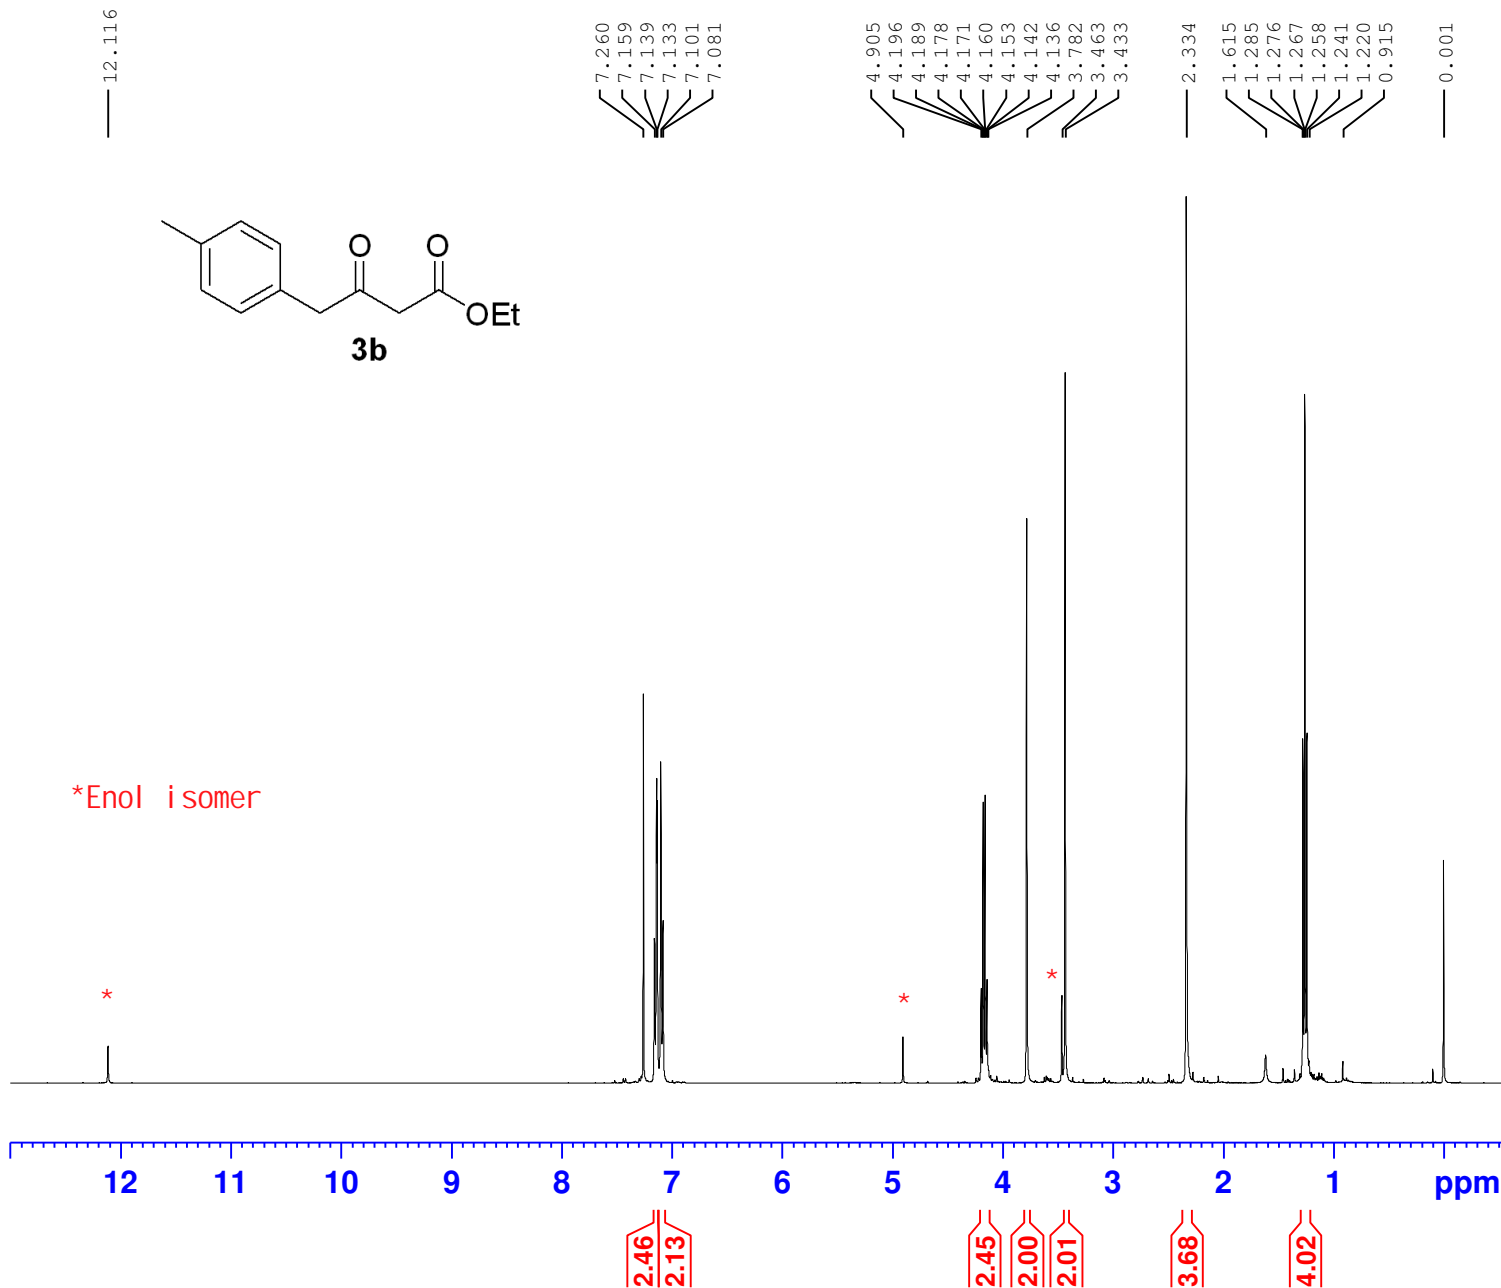

3sjwei 2399 zty-5-10b 13c cdcl3



Current Data Parameters  
NAME zty-5-10b-c-fr  
EXPNO 1  
PROCNO 1

F2 - Acquisition Parameters  
Date\_ 20210105  
Time 20.49  
INSTRUM spect  
PROBHD 5 mm PABBO BB-  
PULPROG zgpg30  
TD 65536  
SOLVENT CDC13  
NS 999  
DS 4  
SWH 18028.846 Hz  
FIDRES 0.275098 Hz  
AQ 1.8175317 sec  
RG 203  
DW 27.733 usec  
DE 6.50 usec  
TE 290.3 K  
D1 2.00000000 sec  
D11 0.03000000 sec  
TD0 1

=====  
CHANNEL f1  
SFO1 75.4752949 MHz  
NUC1 13C  
P1 9.50 usec  
PLW1 34.20000076 W

=====  
CHANNEL f2  
SFO2 300.1312005 MHz  
NUC2 1H  
CPDPRG[2] waltz16  
PCPD2 90.00 usec  
PLW2 14.00000000 W  
PLW12 0.17284000 W  
PLW13 0.14000000 W

F2 - Processing parameters  
SI 32768  
SF 75.4677542 MHz  
WDW EM  
SSB 0  
LB 1.00 Hz  
GB 0  
PC 1.40

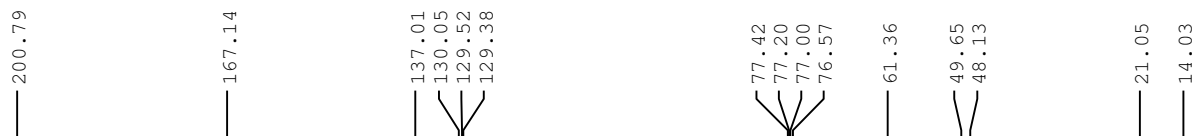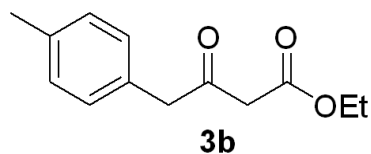

\*Enol isomer

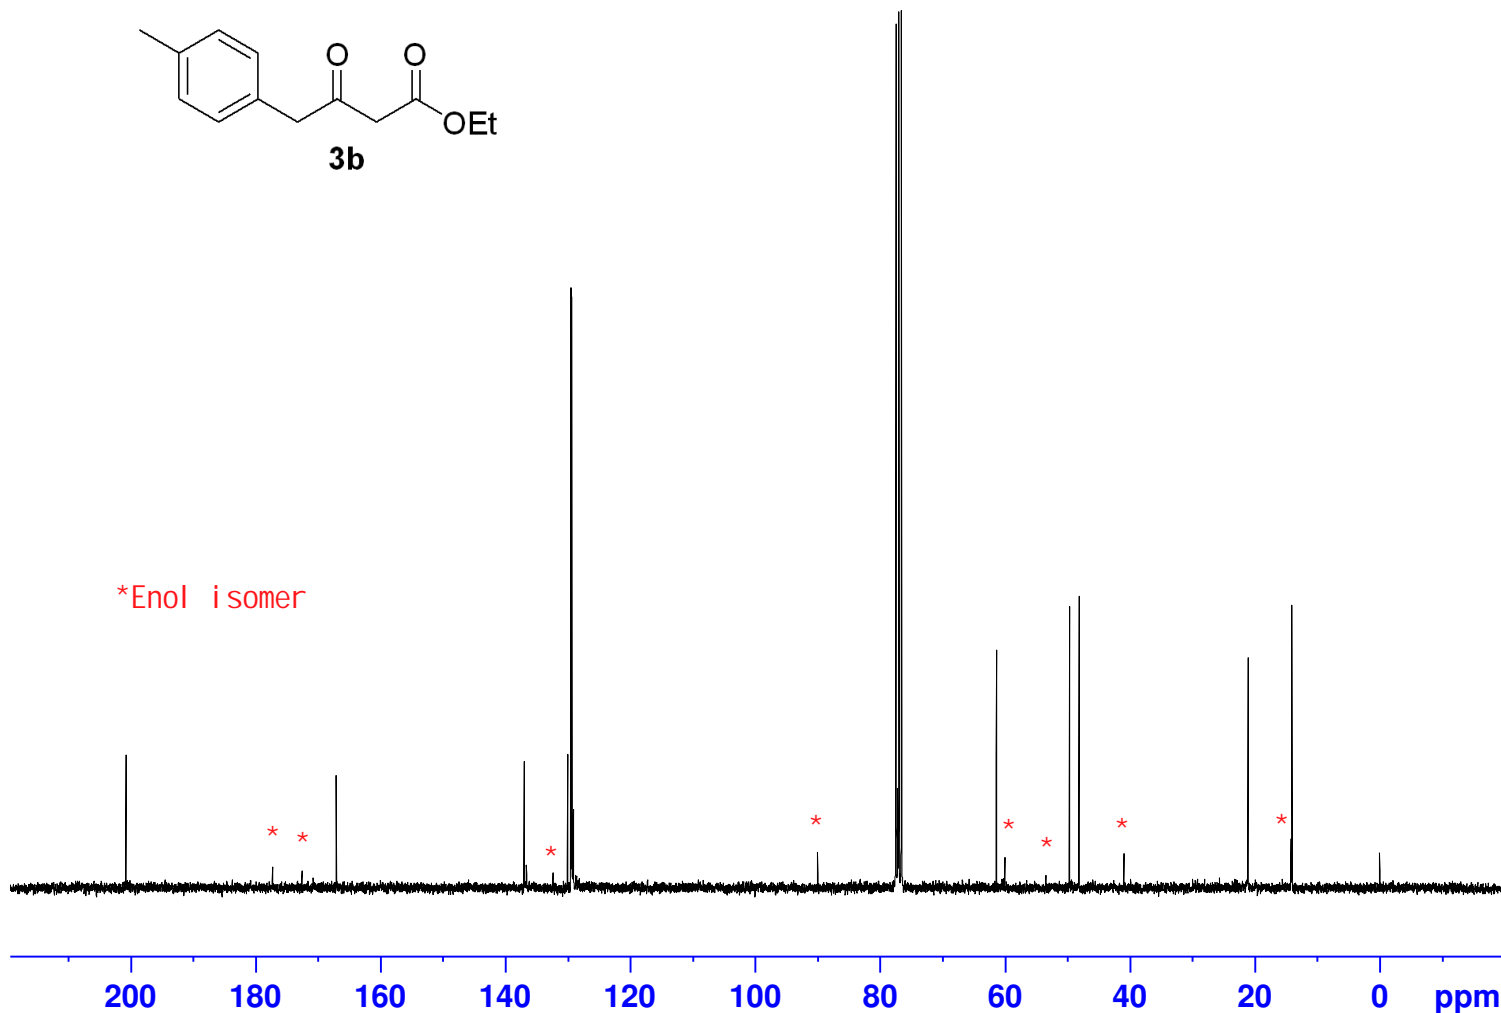

3sjwei 2145 zty-5-10f 1h cdcl3



Current Data Parameters  
NAME ZTY-5-10f-h-fr  
EXPNO 1  
PROCNO 1

F2 - Acquisition Parameters  
Date\_ 20201211  
Time 20.33  
INSTRUM spect  
PROBHD 5 mm PABBO BB-  
PULPROG zg30  
TD 65536  
SOLVENT CDC13  
NS 16  
DS 2  
SWH 6009.615 Hz  
FIDRES 0.091699 Hz  
AQ 5.4525952 sec  
RG 114  
DW 83.200 usec  
DE 6.50 usec  
TE 291.3 K  
D1 1.00000000 sec  
TD0 1

==== CHANNEL f1 =====  
SFO1 300.1318534 MHz  
NUC1 1H  
P1 10.00 usec  
PLW1 14.00000000 W

F2 - Processing parameters  
SI 65536  
SF 300.1300072 MHz  
WDW EM  
SSB 0  
LB 0.30 Hz  
GB 0  
PC 1.00

7.260  
7.172  
7.143  
7.133  
7.126  
7.111  
7.104  
7.095  
6.893  
6.884  
6.877  
6.868  
6.862  
6.855  
6.845  
6.839  
4.885  
4.201  
4.177  
4.153  
4.129  
3.792  
3.758  
3.433  
1.279  
1.255  
1.231  
-0.006

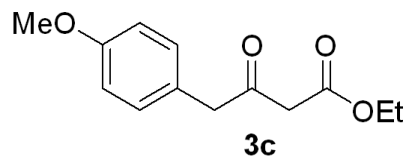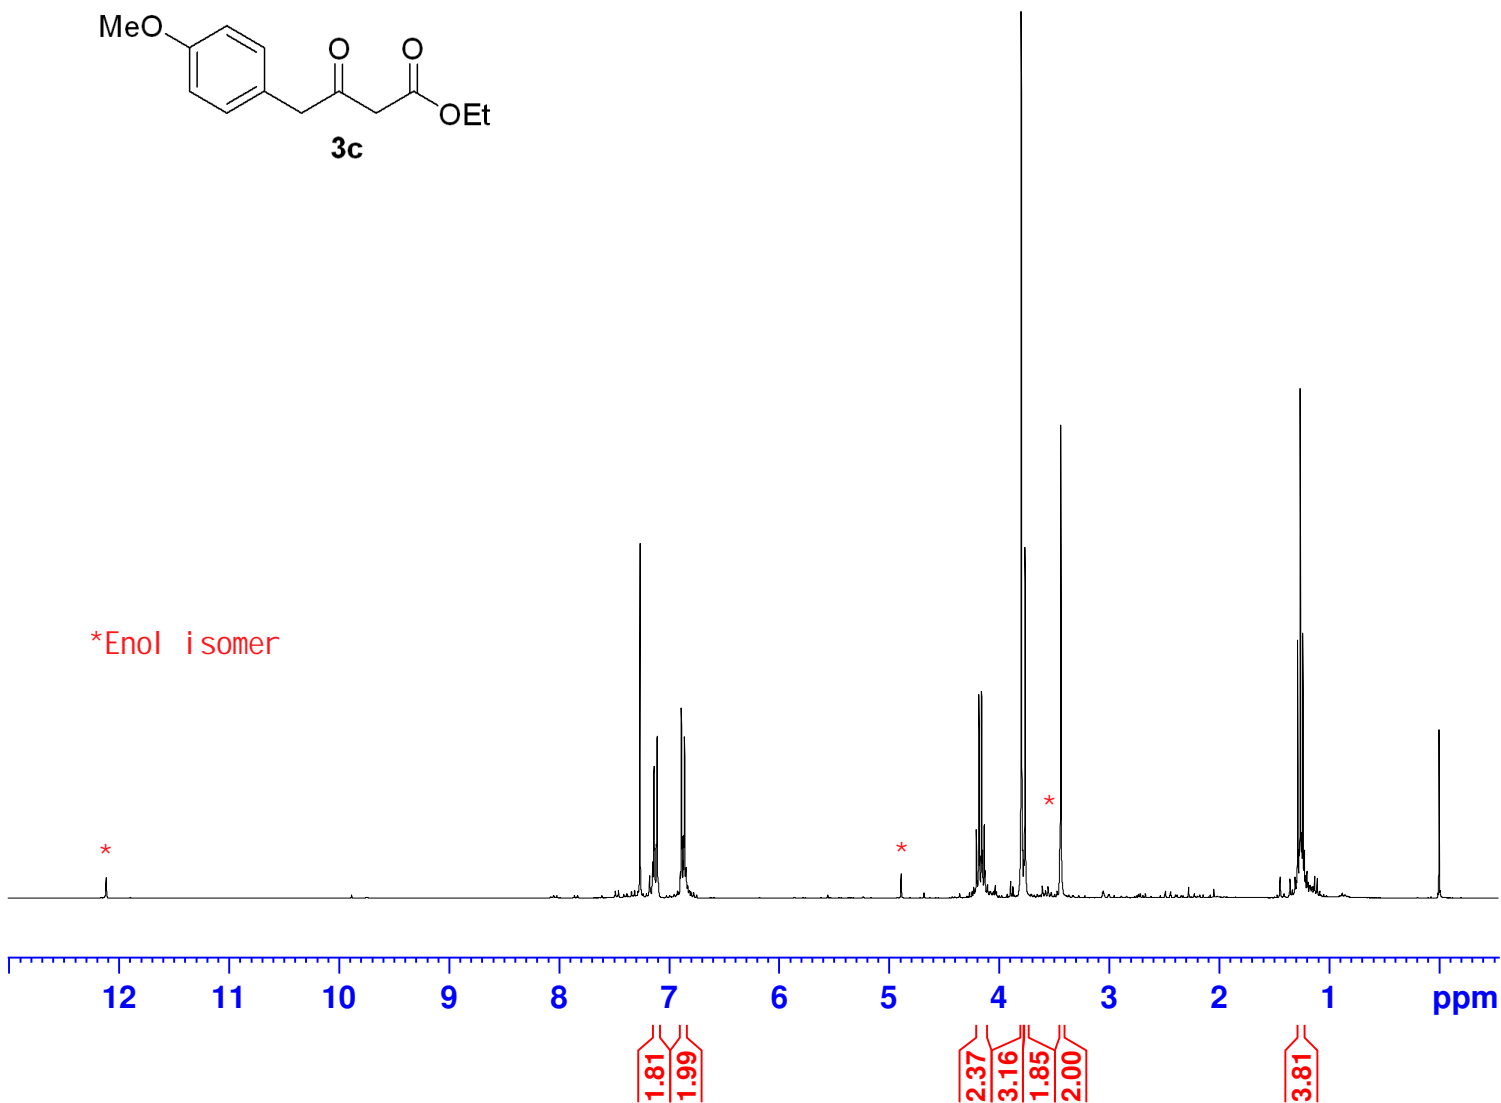

\*Enol isomer

1.81  
1.99

2.37  
3.16  
1.85  
2.00

3.81

3sjwei 2401 zty-5-10f 13c cdcl3

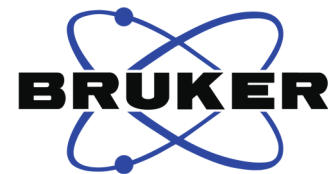

Current Data Parameters  
NAME ZTY-5-10f-c-fr  
EXPNO 1  
PROCNO 1

F2 - Acquisition Parameters  
Date\_ 20210106  
Time 5.06  
INSTRUM spect  
PROBHD 5 mm PABBO BB-  
PULPROG zgpg30  
TD 65536  
SOLVENT CDCl3  
NS 1024  
DS 4  
SWH 18028.846 Hz  
FIDRES 0.275098 Hz  
AQ 1.8175317 sec  
RG 203  
DW 27.733 usec  
DE 6.50 usec  
TE 290.5 K  
D1 2.0000000 sec  
D11 0.0300000 sec  
TD0 1

==== CHANNEL f1 =====  
SFO1 75.4752949 MHz  
NUC1 13C  
P1 9.50 usec  
PLW1 34.20000076 W

==== CHANNEL f2 =====  
SFO2 300.1312005 MHz  
NUC2 1H  
CPDPRG[2] waltz16  
PCPD2 90.00 usec  
PLW2 14.00000000 W  
PLW12 0.17284000 W  
PLW13 0.14000000 W

F2 - Processing parameters  
SI 32768  
SF 75.4677541 MHz  
WDW EM  
SSB 0  
LB 1.00 Hz  
GB 0  
PC 1.40

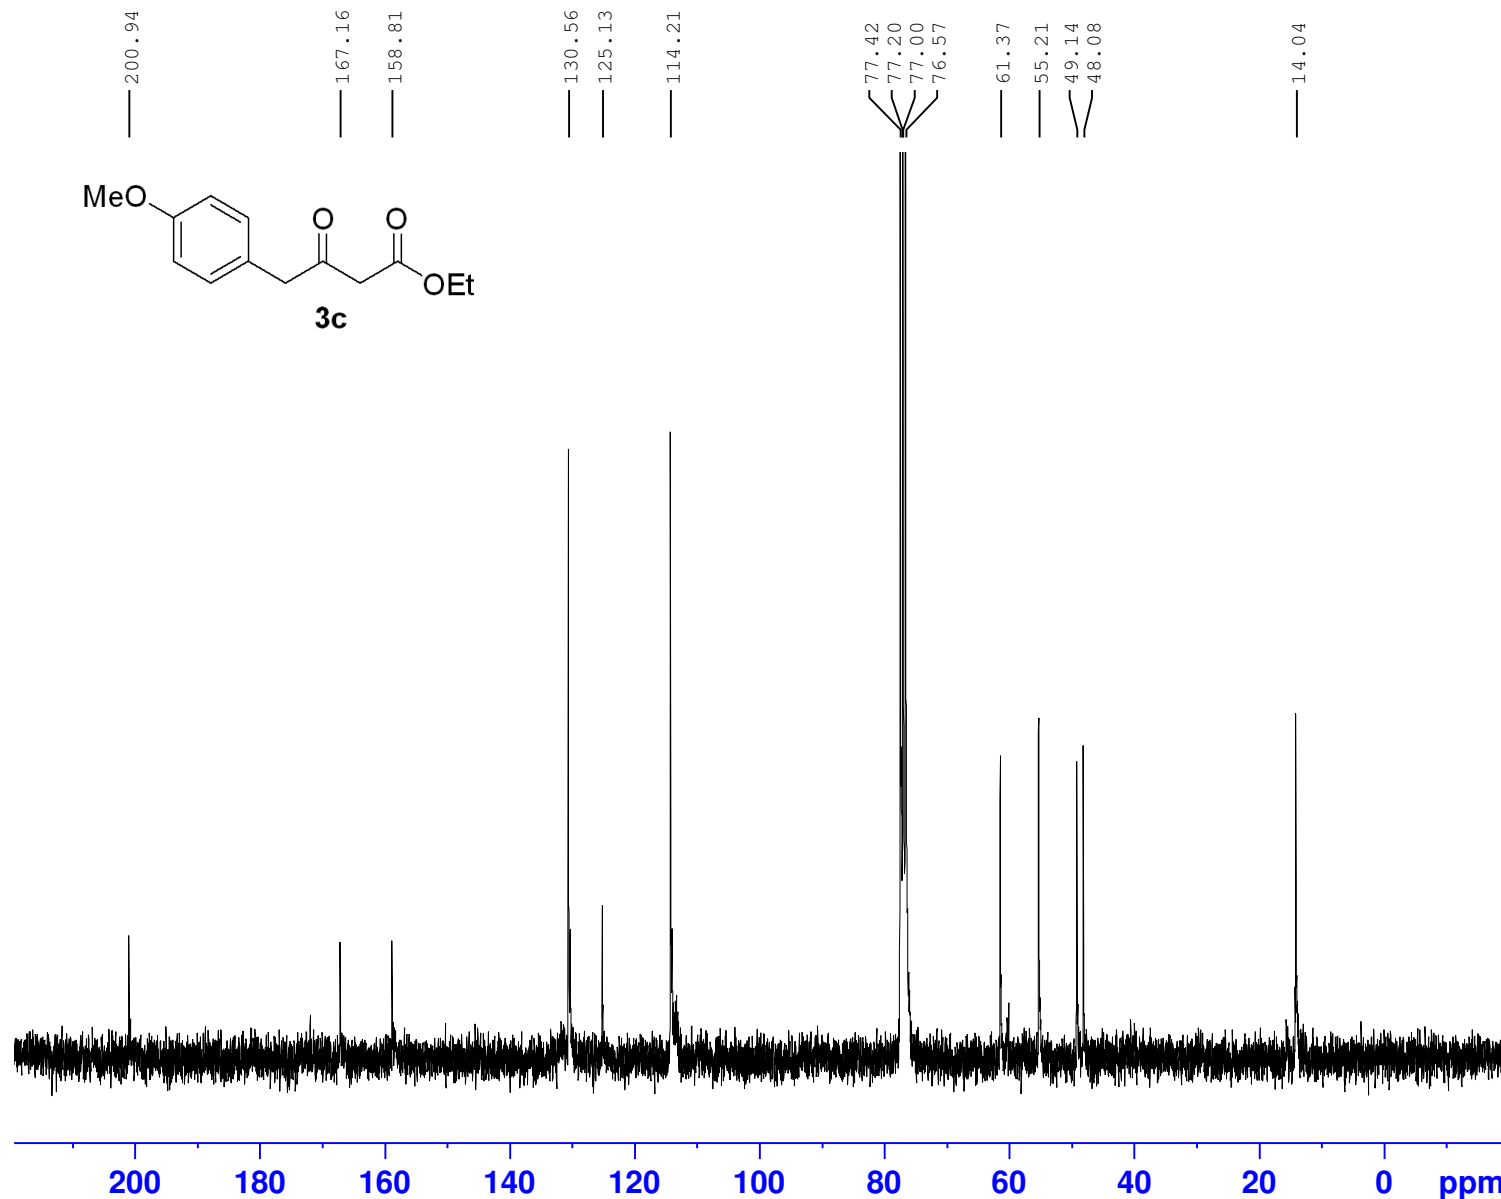

3sjwei 2144 zty-5-10e 1h cdcl3



Current Data Parameters  
NAME ZTY-5-10e-h-fr  
EXPNO 1  
PROCNO 1

F2 - Acquisition Parameters  
Date\_ 20201211  
Time 20.28  
INSTRUM spect  
PROBHD 5 mm PABBO BB-  
PULPROG zg30  
TD 65536  
SOLVENT CDC13  
NS 16  
DS 2  
SWH 6009.615 Hz  
FIDRES 0.091699 Hz  
AQ 5.4525952 sec  
RG 161  
DW 83.200 usec  
DE 6.50 usec  
TE 291.3 K  
D1 1.00000000 sec  
TD0 1

==== CHANNEL f1 =====  
SFO1 300.1318534 MHz  
NUC1 1H  
P1 10.00 usec  
PLW1 14.00000000 W

F2 - Processing parameters  
SI 65536  
SF 300.1300073 MHz  
WDW EM  
SSB 0  
LB 0.30 Hz  
GB 0  
PC 1.00

12.221  
12.188  
12.125

7.260  
7.212  
7.201  
7.190  
7.183  
7.172  
7.161  
7.151  
7.144  
7.134  
7.063  
7.053  
7.046  
7.032  
7.024  
7.017  
7.003  
6.995  
6.974  
4.891  
4.211  
4.203  
4.188  
4.179  
4.164  
4.155  
4.140  
4.131  
3.812  
3.468  
3.456  
3.448

2.271

1.304  
1.286  
1.281  
1.262  
1.238

-0.007

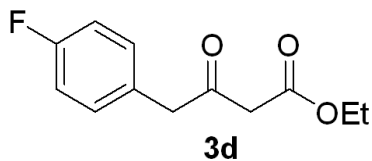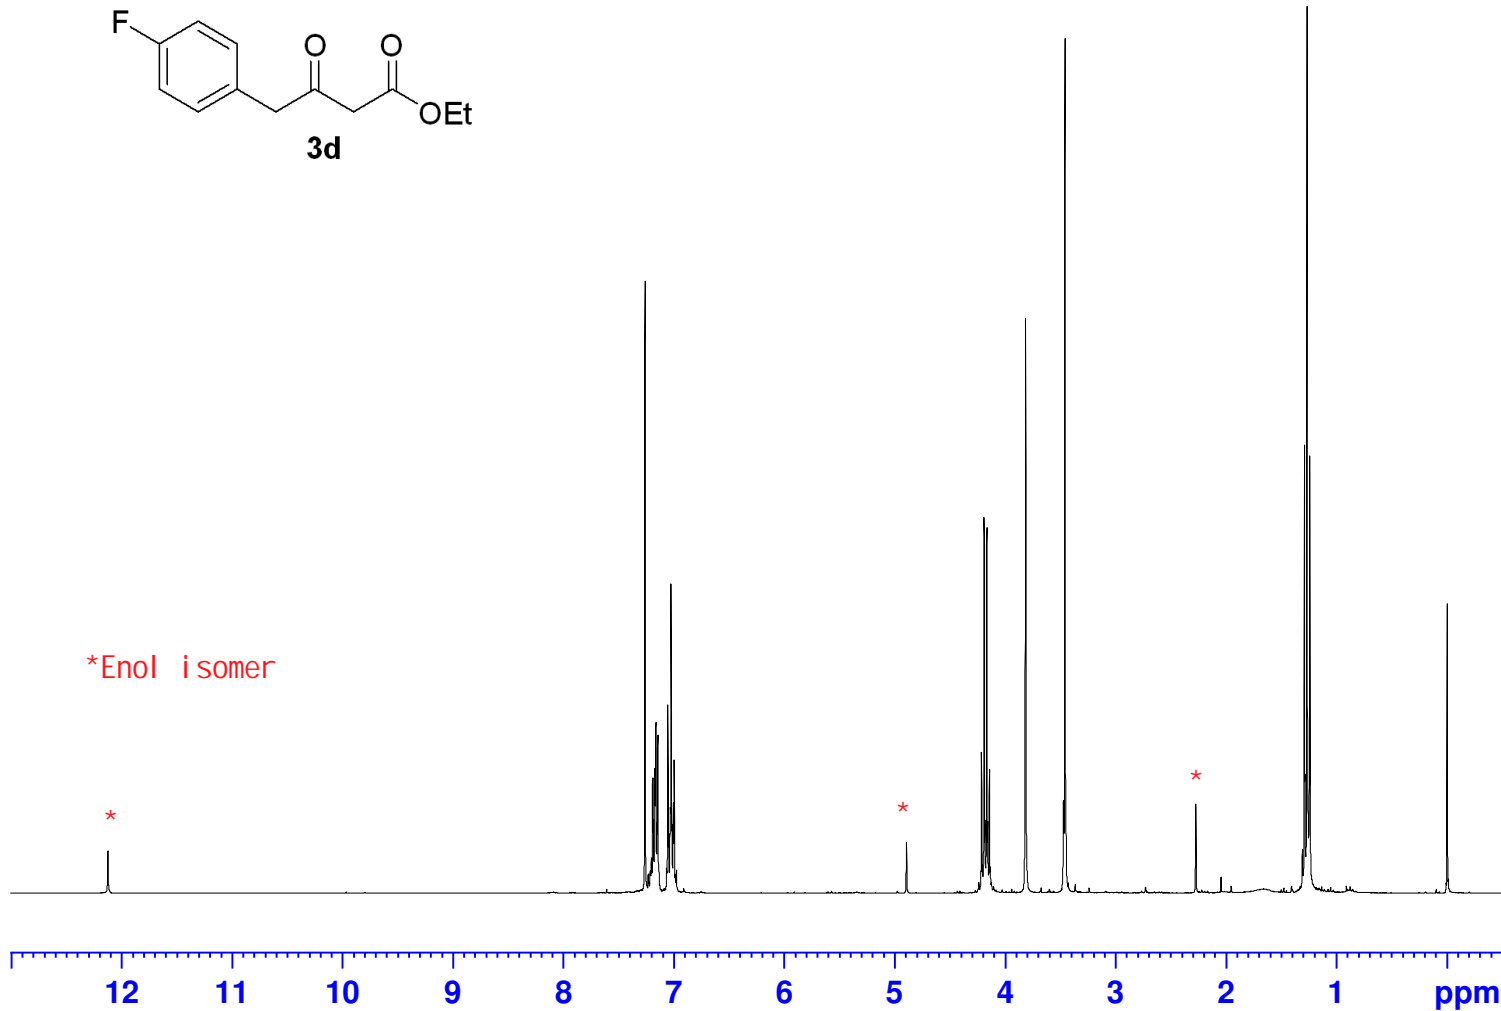

2.34  
2.37

2.62  
2.00  
1.82

4.21

3sjwei 2393 zty-5-10e 13c cdcl3



Current Data Parameters  
NAME ZTY-5-10e-c-fr  
EXPNO 1  
PROCNO 1

F2 - Acquisition Parameters  
Date\_ 20210105  
Time 12.24  
INSTRUM spect  
PROBHD 5 mm PABBO BB-  
PULPROG zgpg30  
TD 65536  
SOLVENT CDCl3  
NS 1024  
DS 4  
SWH 18028.846 Hz  
FIDRES 0.275098 Hz  
AQ 1.8175317 sec  
RG 203  
DW 27.733 usec  
DE 6.50 usec  
TE 290.7 K  
D1 2.00000000 sec  
D11 0.03000000 sec  
TD0 1

=====  
CHANNEL f1  
SFO1 75.4752949 MHz  
NUC1 13C  
P1 9.50 usec  
PLW1 34.20000076 W

=====  
CHANNEL f2  
SFO2 300.1312005 MHz  
NUC2 1H  
CPDPRG[2] waltz16  
PCPD2 90.00 usec  
PLW2 14.00000000 W  
PLW12 0.17284000 W  
PLW13 0.14000000 W

F2 - Processing parameters  
SI 32768  
SF 75.4677533 MHz  
WDW EM  
SSB 0  
LB 1.00 Hz  
GB 0  
PC 1.40

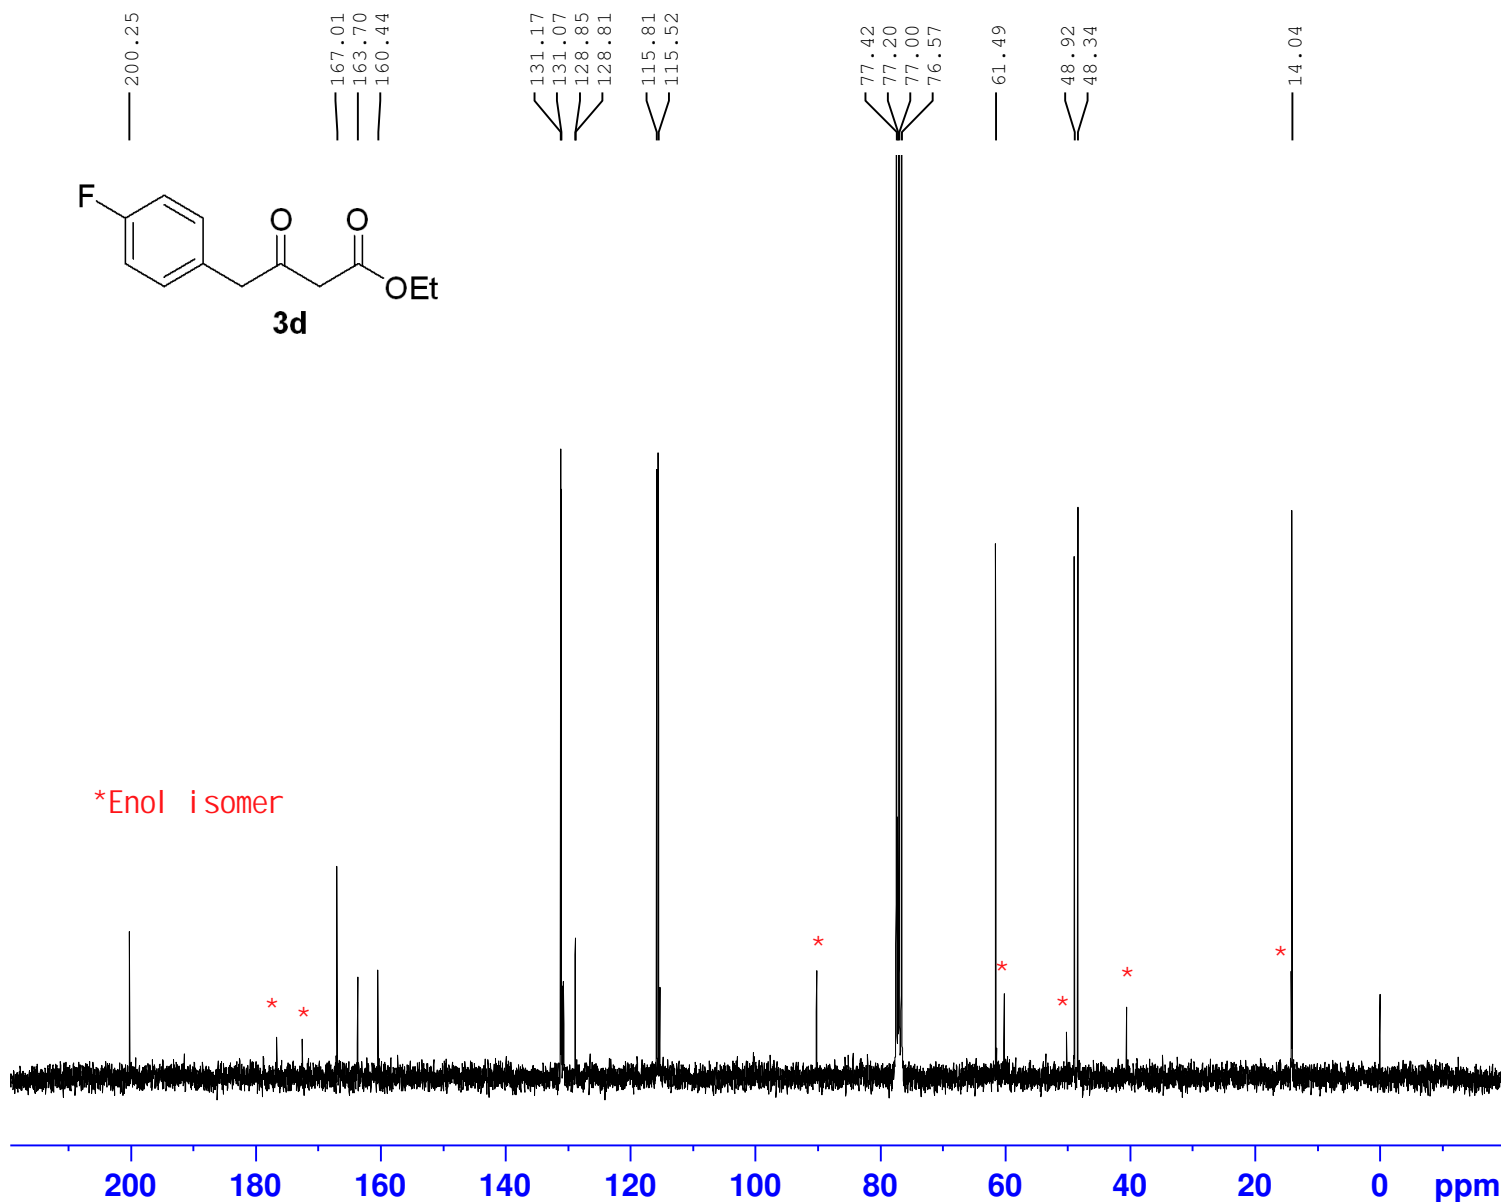

\*Enol isomer



3sjwei 2510 zty-5-10c-h-fr 1h cdcl3

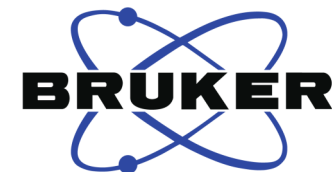

Current Data Parameters  
NAME zty-5-10c-h-fr  
EXPNO 1  
PROCNO 1

F2 - Acquisition Parameters  
Date\_ 20210115  
Time 12.36  
INSTRUM spect  
PROBHD 5 mm PABBO BB-  
PULPROG zg30  
TD 65536  
SOLVENT CDC13  
NS 16  
DS 2  
SWH 6009.615 Hz  
FIDRES 0.091699 Hz  
AQ 5.4525952 sec  
RG 181  
DW 83.200 usec  
DE 6.50 usec  
TE 291.1 K  
D1 1.00000000 sec  
TD0 1

==== CHANNEL f1 =====  
SFO1 300.1318534 MHz  
NUC1 1H  
P1 10.00 usec  
PLW1 14.00000000 W

F2 - Processing parameters  
SI 65536  
SF 300.1300073 MHz  
WDW EM  
SSB 0  
LB 0.30 Hz  
GB 0  
PC 1.00

12.122

7.325  
7.318  
7.304  
7.297  
7.289  
7.277  
7.260  
7.194  
7.159  
7.151  
7.144  
7.129  
7.122

4.895  
4.214  
4.205  
4.190  
4.181  
4.167  
4.157  
4.143  
4.134  
3.815  
3.458

1.289  
1.283  
1.265  
1.257  
1.248  
1.241  
1.233

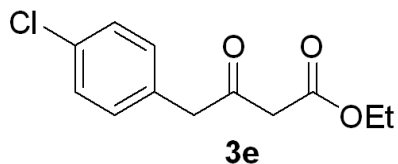

\*Enol isomer

\*

\*

\*

12

11

10

9

8

7

6

5

4

3

2

1

ppm

2.44  
2.37

2.56  
2.00  
2.37

4.36

3sjwei 2525 zty-5-10c-c-fr 13c cdcl3



Current Data Parameters  
NAME zty-5-10c-c-fr  
EXPNO 1  
PROCNO 1

F2 - Acquisition Parameters  
Date\_ 20210115  
Time 16.04  
INSTRUM spect  
PROBHD 5 mm PABBO BB-  
PULPROG zgpg30  
TD 65536  
SOLVENT CDC13  
NS 650  
DS 4  
SWH 18028.846 Hz  
FIDRES 0.275098 Hz  
AQ 1.8175317 sec  
RG 203  
DW 27.733 usec  
DE 6.50 usec  
TE 292.6 K  
D1 2.00000000 sec  
D11 0.03000000 sec  
TD0 1

=====  
CHANNEL f1  
SFO1 75.4752949 MHz  
NUC1 13C  
P1 9.50 usec  
PLW1 34.20000076 W

=====  
CHANNEL f2  
SFO2 300.1312005 MHz  
NUC2 1H  
CPDPRG[2] waltz16  
PCPD2 90.00 usec  
PLW2 14.00000000 W  
PLW12 0.17284000 W  
PLW13 0.14000000 W

F2 - Processing parameters  
SI 32768  
SF 75.4677525 MHz  
WDW EM  
SSB 0  
LB 1.00 Hz  
GB 0  
PC 1.40

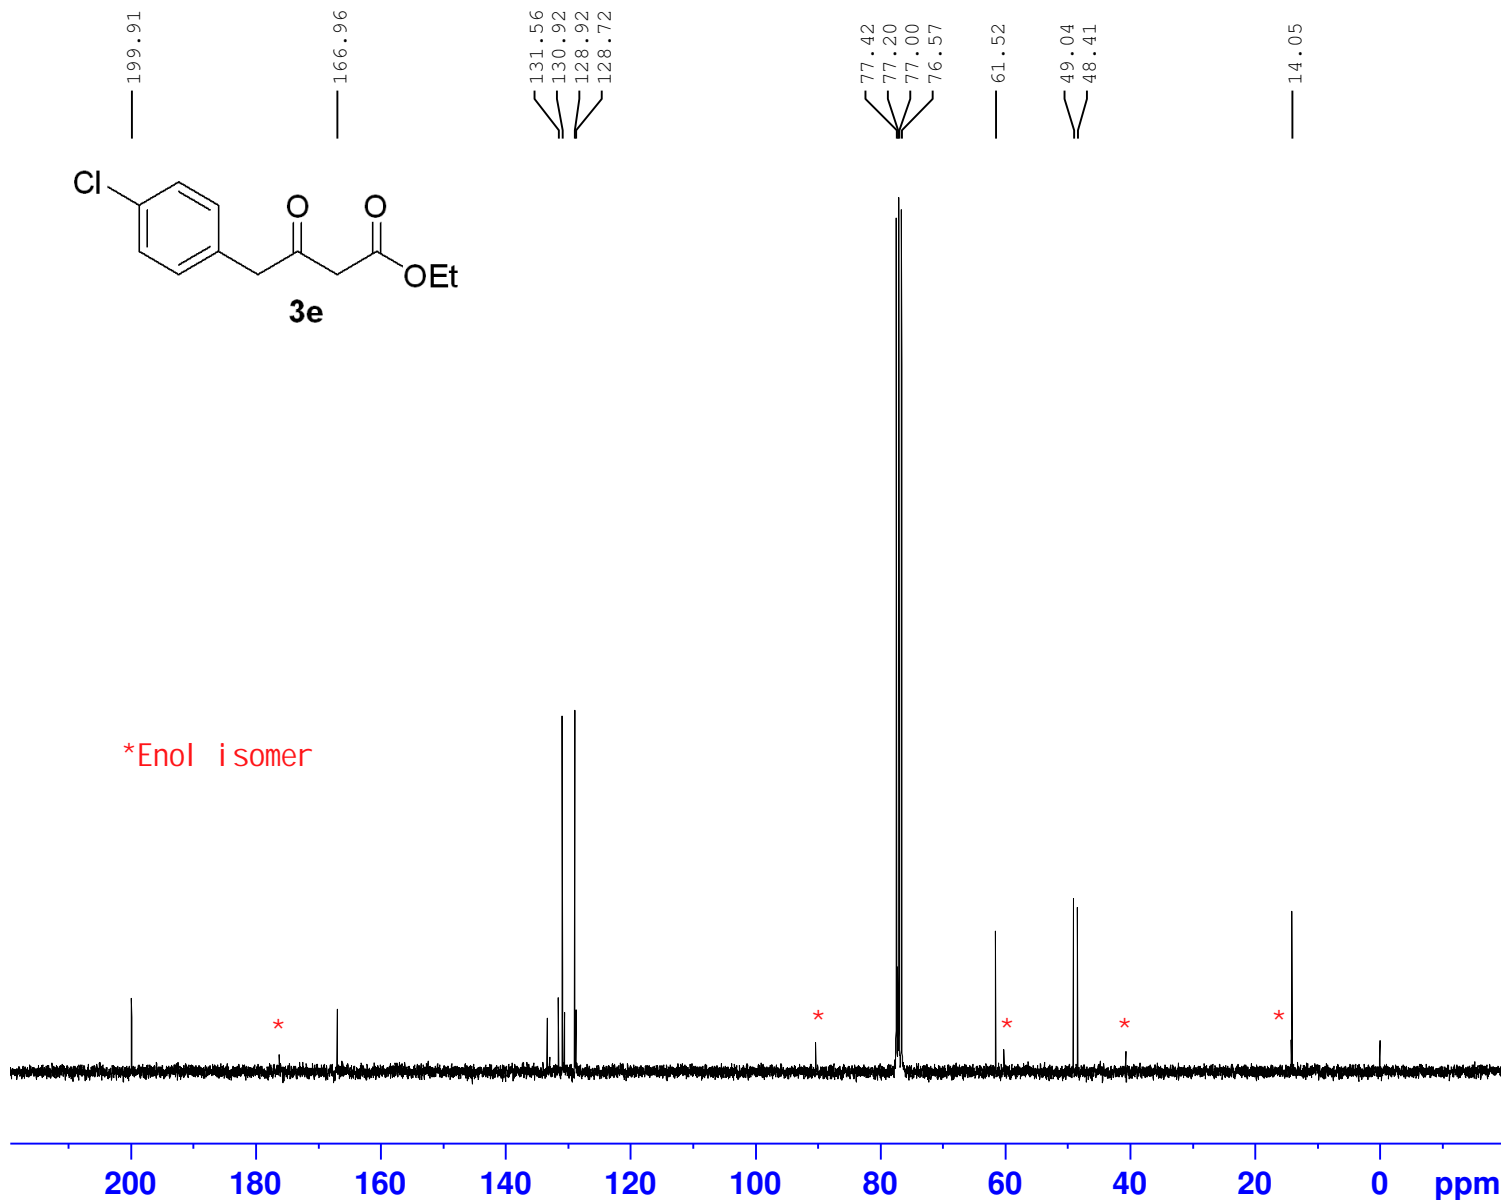

3sjwei 2143 zty-5-10d 1h cdcl3



Current Data Parameters  
NAME zty-5-10d-h-fr  
EXPNO 1  
PROCNO 1

F2 - Acquisition Parameters  
Date\_ 20201211  
Time 20.24  
INSTRUM spect  
PROBHD 5 mm PABBO BB-  
PULPROG zg30  
TD 65536  
SOLVENT CDC13  
NS 16  
DS 2  
SWH 6009.615 Hz  
FIDRES 0.091699 Hz  
AQ 5.4525952 sec  
RG 161  
DW 83.200 usec  
DE 6.50 usec  
TE 291.3 K  
D1 1.00000000 sec  
TD0 1

==== CHANNEL f1 =====  
SFO1 300.1318534 MHz  
NUC1 1H  
P1 10.00 usec  
PLW1 14.00000000 W

F2 - Processing parameters  
SI 65536  
SF 300.1300072 MHz  
WDW EM  
SSB 0  
LB 0.30 Hz  
GB 0  
PC 1.00

12.463  
12.182  
12.119

7.476  
7.470  
7.455  
7.448  
7.440  
7.434  
7.427  
7.260  
7.138  
7.109  
7.092  
7.064

4.893  
4.213  
4.203  
4.189  
4.180  
4.165  
4.156  
4.141  
4.132  
3.799  
3.457  
3.448  
3.431

2.271

1.305  
1.287  
1.281  
1.263  
1.239

-0.007

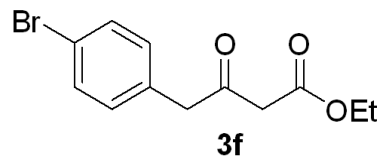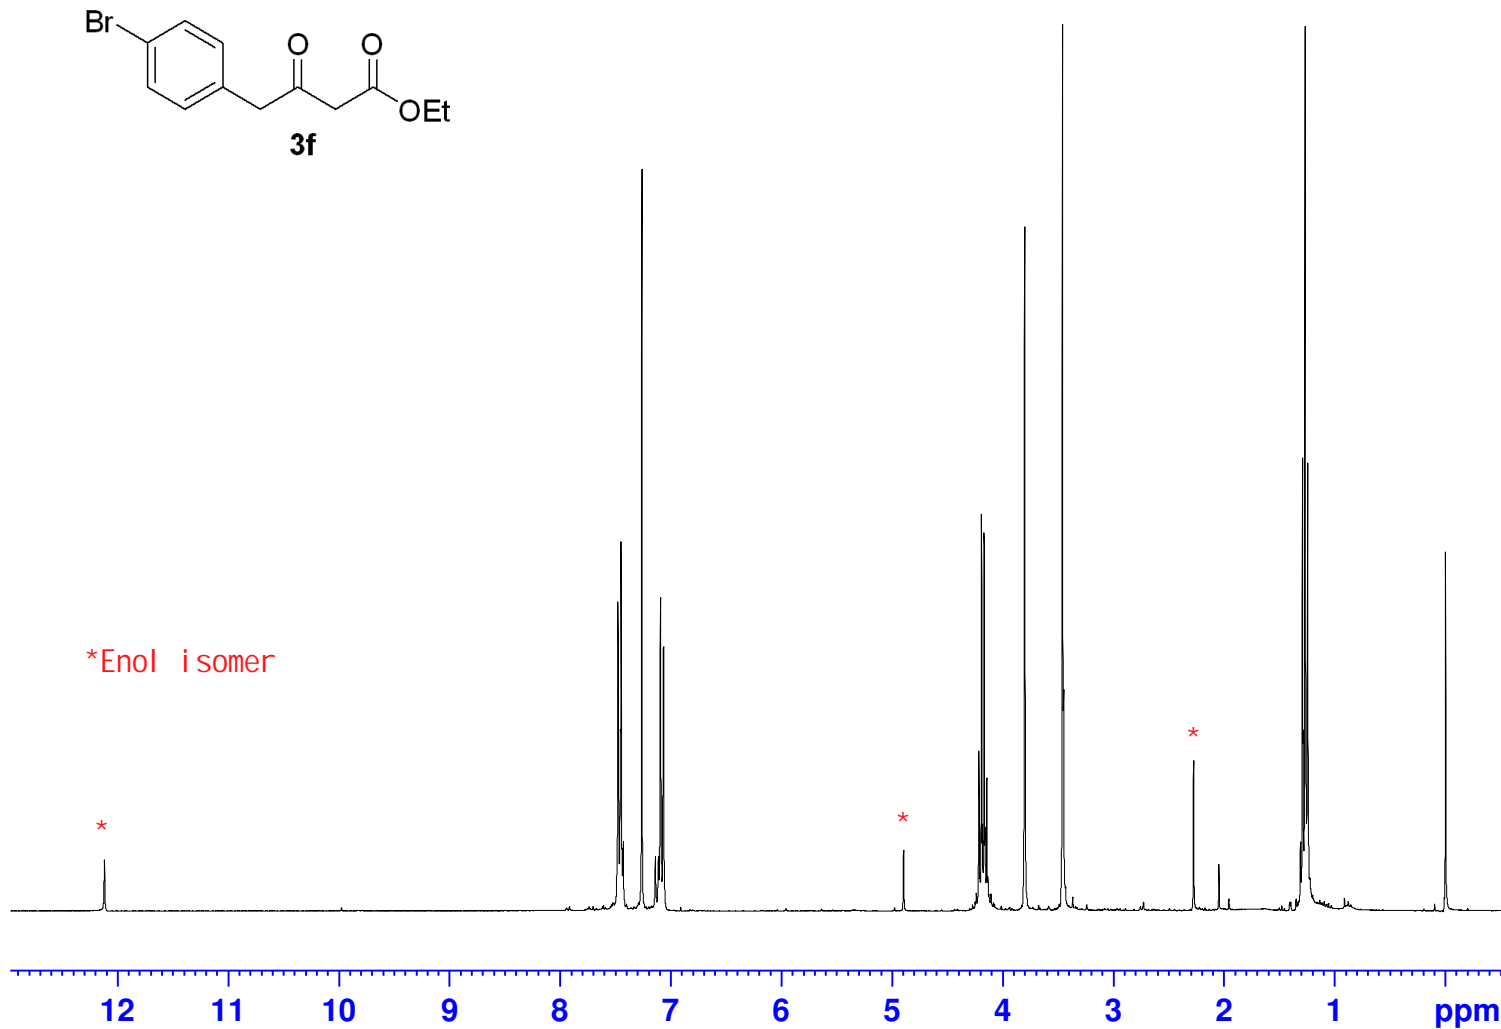

2.43  
2.28

2.64  
2.00  
1.80

4.35

3sjwei 2398 zty-5-10d 13c cdcl3

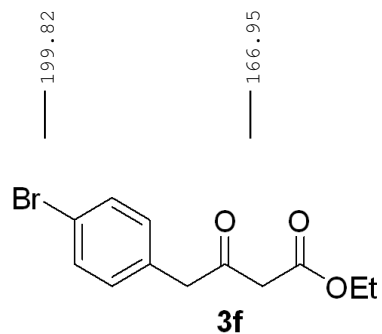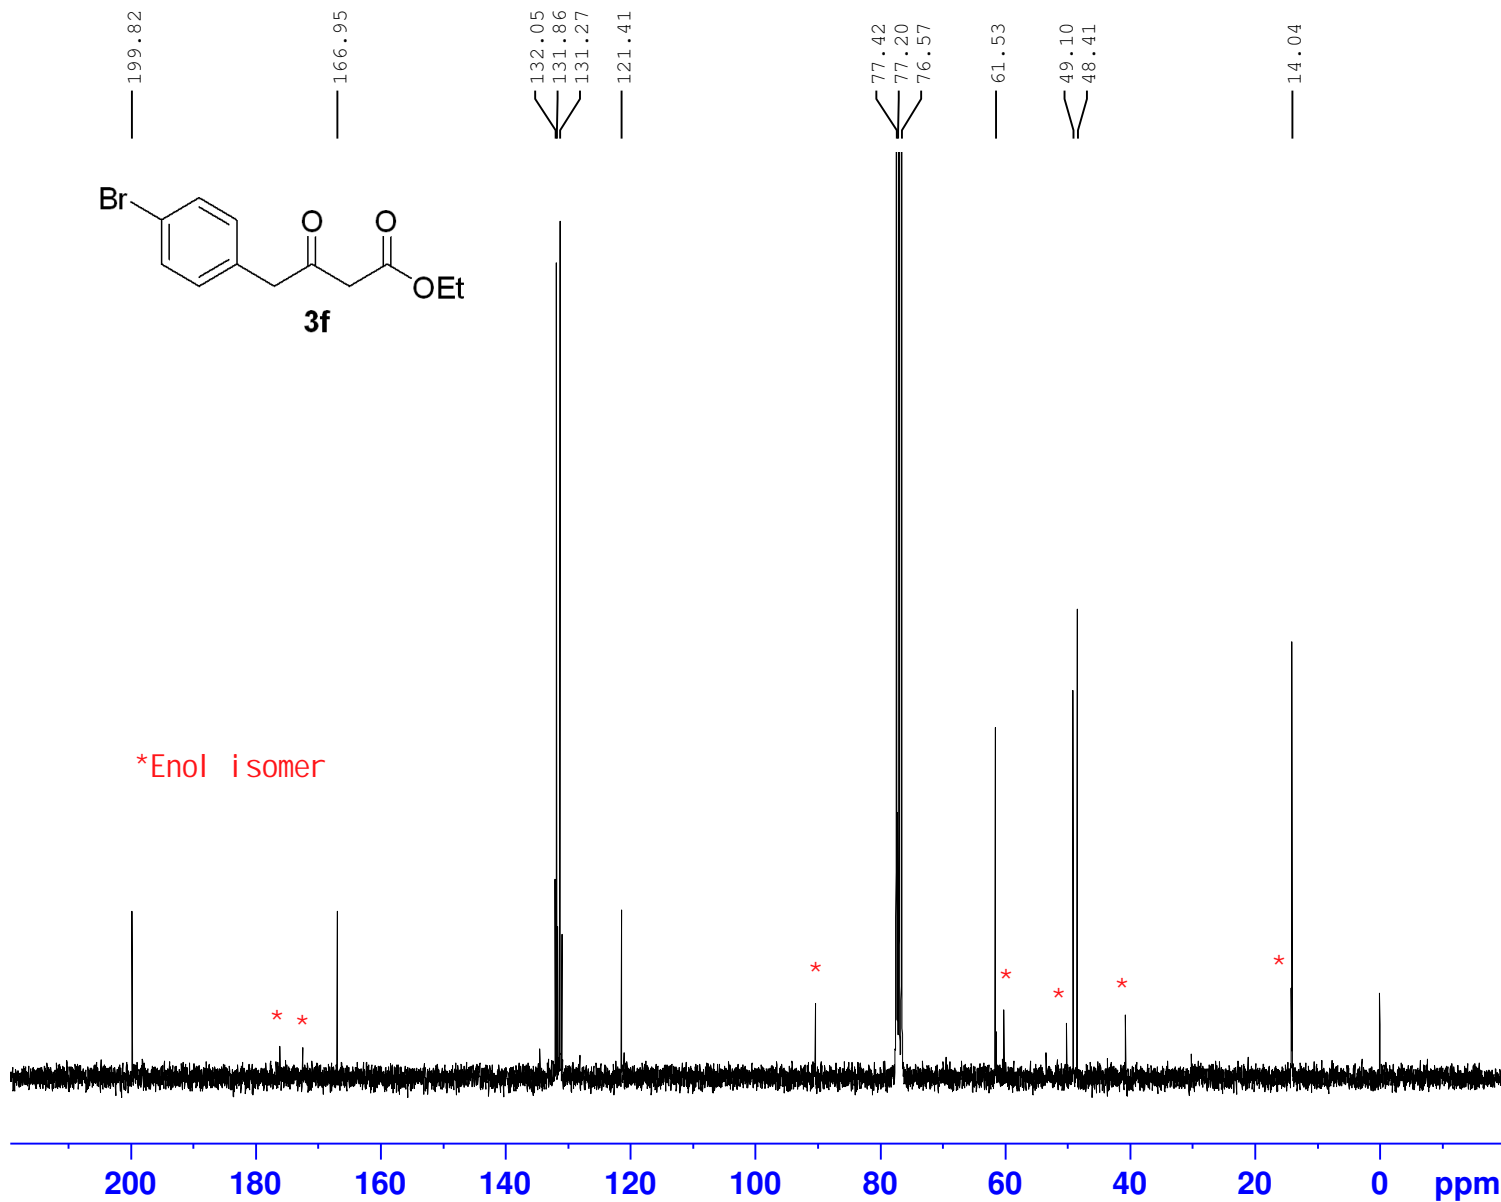

Current Data Parameters  
NAME zty-5-10d-c-fr  
EXPNO 1  
PROCNO 1

F2 - Acquisition Parameters  
Date\_ 20210105  
Time 19.41  
INSTRUM spect  
PROBHD 5 mm PABBO BB-  
PULPROG zgpg30  
TD 65536  
SOLVENT CDCl3  
NS 1024  
DS 4  
SWH 18028.846 Hz  
FIDRES 0.275098 Hz  
AQ 1.8175317 sec  
RG 203  
DW 27.733 usec  
DE 6.50 usec  
TE 290.0 K  
D1 2.00000000 sec  
D11 0.03000000 sec  
TD0 1

=====  
CHANNEL f1  
SFO1 75.4752949 MHz  
NUC1 13C  
P1 9.50 usec  
PLW1 34.20000076 W

=====  
CHANNEL f2  
SFO2 300.1312005 MHz  
NUC2 1H  
CPDPRG[2] waltz16  
PCPD2 90.00 usec  
PLW2 14.00000000 W  
PLW12 0.17284000 W  
PLW13 0.14000000 W

F2 - Processing parameters  
SI 32768  
SF 75.4677536 MHz  
WDW EM  
SSB 0  
LB 1.00 Hz  
GB 0  
PC 1.40

3sjwei 2156 zty-5-10h 1h cdcl3



Current Data Parameters  
NAME ZTY-5-10h-h-fr  
EXPNO 1  
PROCNO 1

F2 - Acquisition Parameters  
Date\_ 20201212  
Time 10.15  
INSTRUM spect  
PROBHD 5 mm PABBO BB-  
PULPROG zg30  
TD 65536  
SOLVENT CDC13  
NS 16  
DS 2  
SWH 6009.615 Hz  
FIDRES 0.091699 Hz  
AQ 5.4525952 sec  
RG 161  
DW 83.200 usec  
DE 6.50 usec  
TE 290.5 K  
D1 1.00000000 sec  
TD0 1

==== CHANNEL f1 =====  
SFO1 300.1318534 MHz  
NUC1 1H  
P1 10.00 usec  
PLW1 14.00000000 W

F2 - Processing parameters  
SI 65536  
SF 300.1300073 MHz  
WDW EM  
SSB 0  
LB 0.30 Hz  
GB 0  
PC 1.00

12.189

7.260  
7.210  
7.199  
7.193  
7.178  
7.172  
7.167  
7.146  
7.140  
7.127  
7.123  
7.113

4.743  
4.209  
4.185  
4.161  
4.137  
3.848  
3.537  
3.434

2.415  
2.303  
2.247

1.614  
1.287  
1.264  
1.240

-0.002

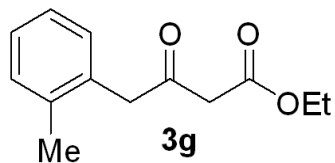

\*Enol isomer

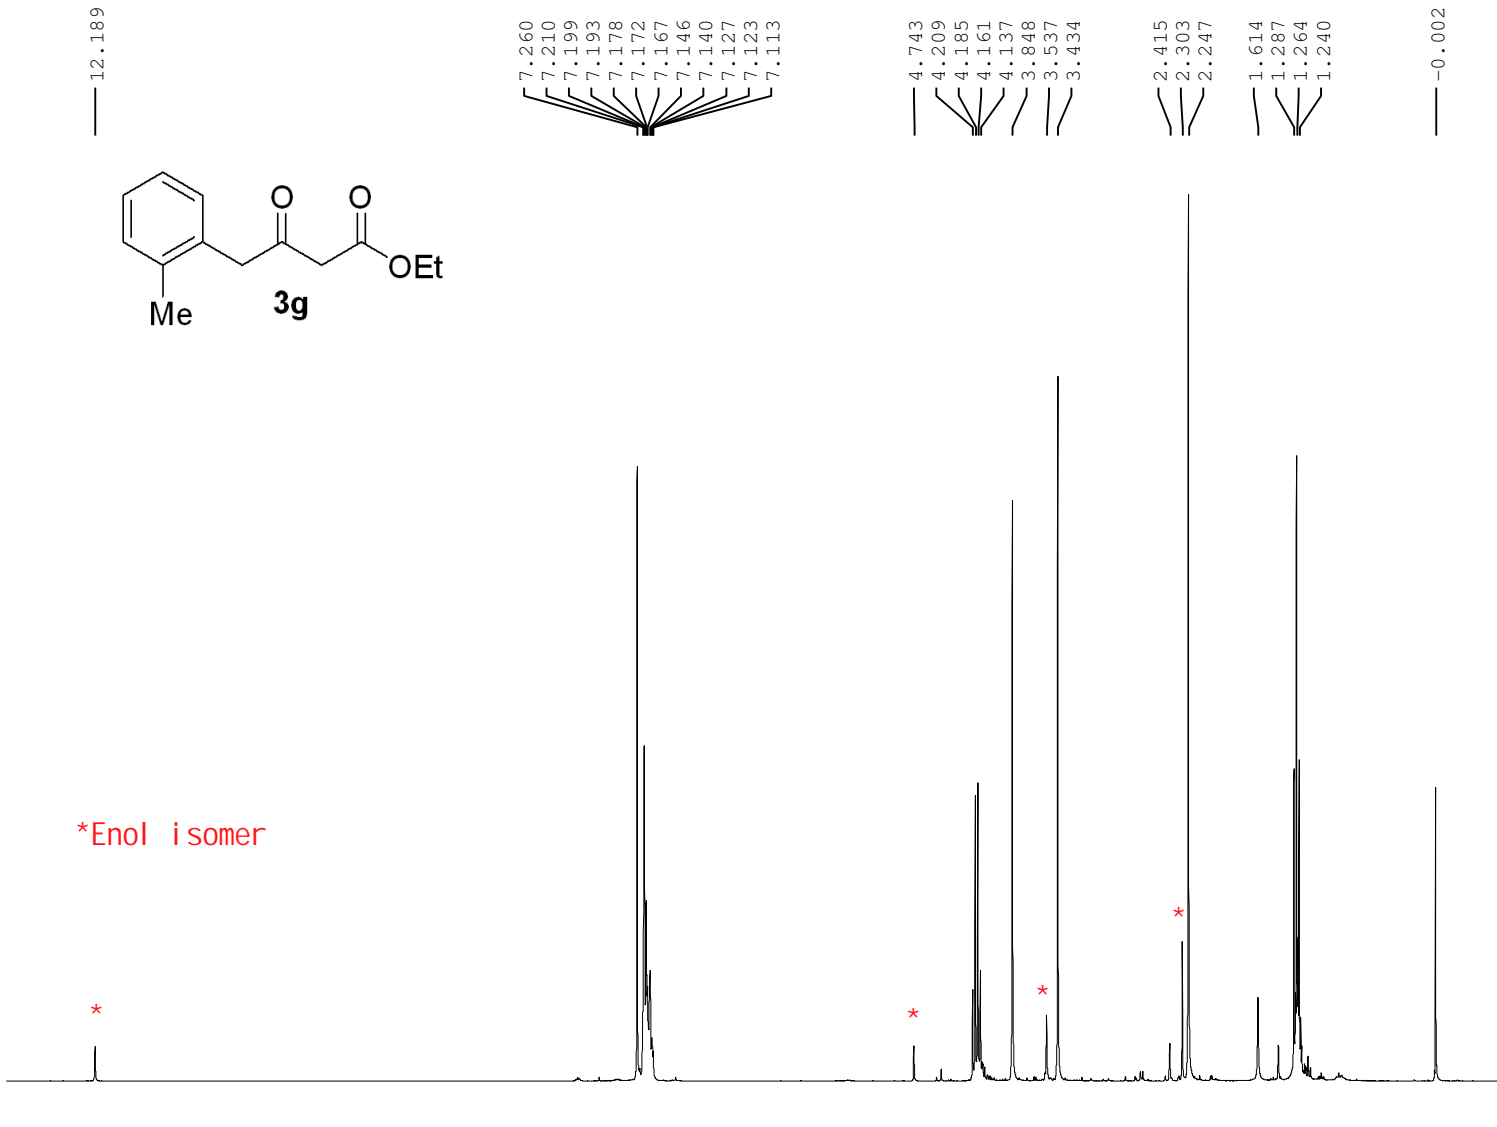

12

11

10

9

8

7

6

5

4

3

2

1

ppm

1.87  
2.43

2.41  
2.00  
2.02

3.04

3.94

3sjwei 2835 zty-5-10h 13c cdcl3

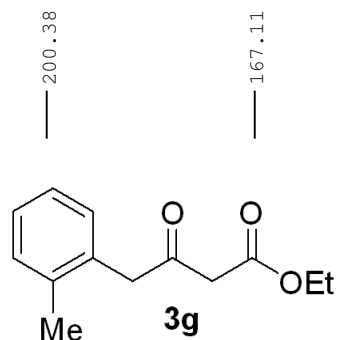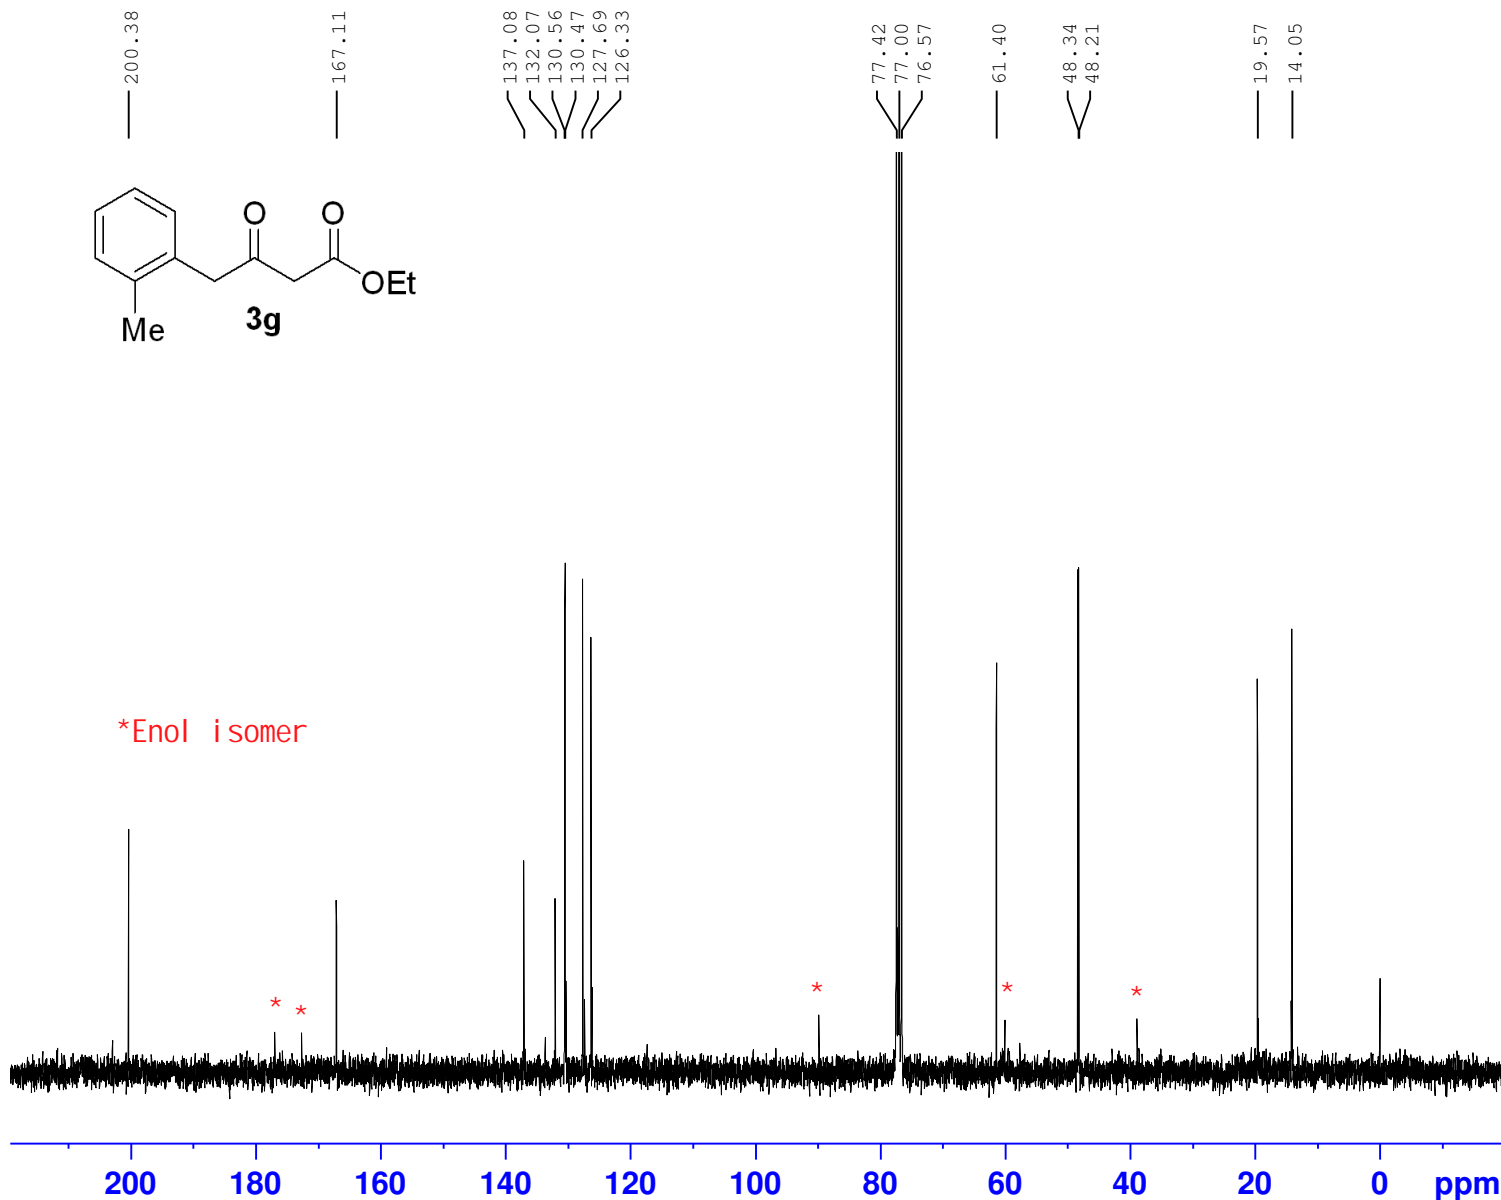

Current Data Parameters  
NAME ZTY-5-10h-c-fr  
EXPNO 1  
PROCNO 1

F2 - Acquisition Parameters  
Date\_ 20210401  
Time 3.18  
INSTRUM spect  
PROBHD 5 mm PABBO BB-  
PULPROG zgpg30  
TD 65536  
SOLVENT CDC13  
NS 700  
DS 4  
SWH 18028.846 Hz  
FIDRES 0.275098 Hz  
AQ 1.8175317 sec  
RG 203  
DW 27.733 usec  
DE 6.50 usec  
TE 296.2 K  
D1 2.00000000 sec  
D11 0.03000000 sec  
TD0 1

=====  
CHANNEL f1  
SFO1 75.4752949 MHz  
NUC1 13C  
P1 9.50 usec  
PLW1 34.20000076 W

=====  
CHANNEL f2  
SFO2 300.1312005 MHz  
NUC2 1H  
CPDPRG[2] waltz16  
PCPD2 90.00 usec  
PLW2 14.00000000 W  
PLW12 0.17284000 W  
PLW13 0.14000000 W

F2 - Processing parameters  
SI 32768  
SF 75.4677519 MHz  
WDW EM  
SSB 0  
LB 1.00 Hz  
GB 0  
PC 1.40

4sunjianwei5/137 zty-5-10i-h



Current Data Parameters  
NAME zty-5-10i-h-fr  
EXPNO 1  
PROCNO 1

F2 - Acquisition Parameters  
Date\_ 20210113  
Time 14.46  
INSTRUM spect  
PROBHD 5 mm PABBO BB-  
PULPROG zg30  
TD 65536  
SOLVENT CDC13  
NS 6  
DS 2  
SWH 8223.685 Hz  
FIDRES 0.125483 Hz  
AQ 3.9845889 sec  
RG 100.49  
DW 60.800 usec  
DE 6.50 usec  
TE 292.4 K  
D1 1.00000000 sec  
TD0 1

==== CHANNEL f1 =====  
NUC1 1H  
P1 14.40 usec  
PLW1 14.00000000 W  
SFO1 400.1924713 MHz

F2 - Processing parameters  
SI 65536  
SF 400.1900153 MHz  
WDW EM  
SSB 0  
LB 0.30 Hz  
GB 0  
PC 1.00

12.186

7.429  
7.393  
7.384  
7.364  
7.260  
7.248  
7.243  
7.236  
7.229

4.833  
4.216  
4.199  
4.181  
4.173  
4.163  
4.155  
4.138  
4.134  
3.980  
3.671  
3.511

1.291  
1.273  
1.255  
1.240

-0.004

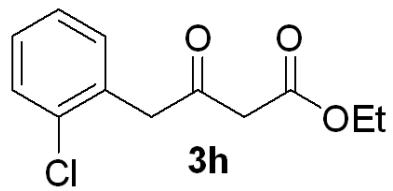

\*Enol isomer

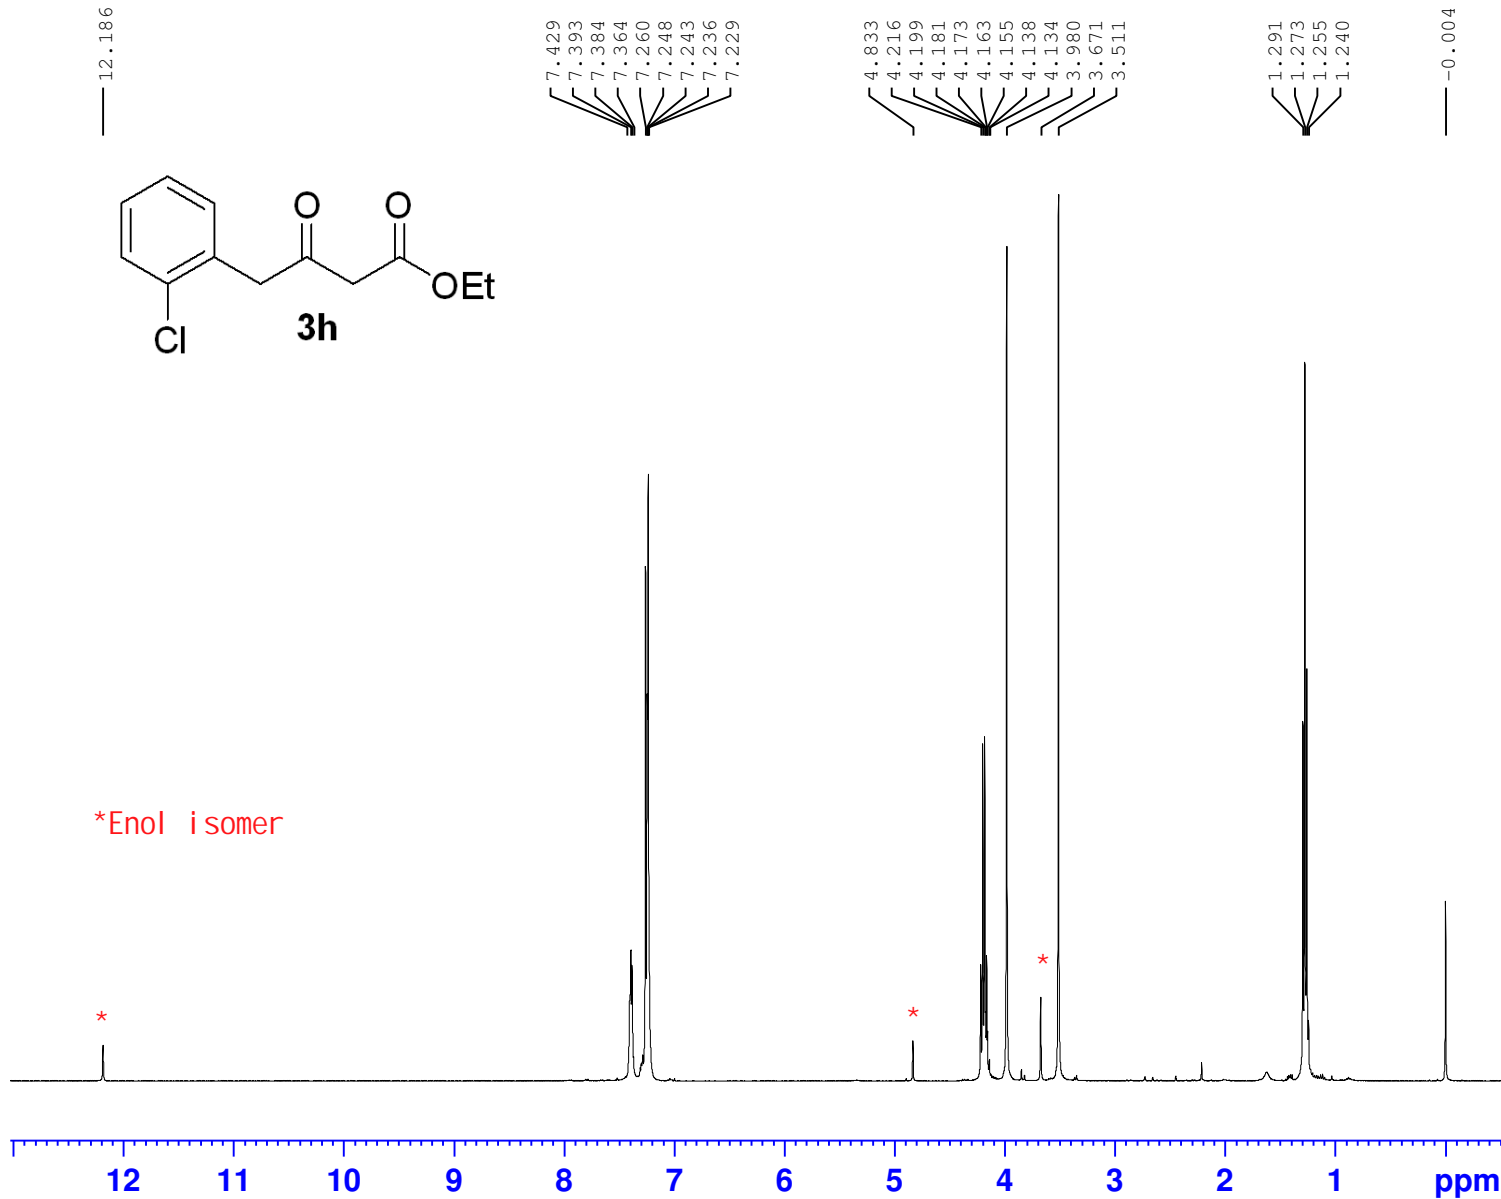

1.10  
2.87

2.18  
2.00  
1.99

3.33

3sjwei 2504 zty-5-10i-c-fr 13c cdcl3



Current Data Parameters  
NAME zty-5-10i-c-fr  
EXPNO 1  
PROCNO 1

F2 - Acquisition Parameters  
Date\_ 20210114  
Time 10.53  
INSTRUM spect  
PROBHD 5 mm PABBO BB-  
PULPROG zgpg30  
TD 65536  
SOLVENT CDCl3  
NS 650  
DS 4  
SWH 18028.846 Hz  
FIDRES 0.275098 Hz  
AQ 1.8175317 sec  
RG 203  
DW 27.733 usec  
DE 6.50 usec  
TE 291.0 K  
D1 2.00000000 sec  
D11 0.03000000 sec  
TD0 1

==== CHANNEL f1 =====  
SFO1 75.4752949 MHz  
NUC1 13C  
P1 9.50 usec  
PLW1 34.20000076 W

==== CHANNEL f2 =====  
SFO2 300.1312005 MHz  
NUC2 1H  
CPDPRG[2] waltz16  
PCPD2 90.00 usec  
PLW2 14.00000000 W  
PLW12 0.17284000 W  
PLW13 0.14000000 W

F2 - Processing parameters  
SI 32768  
SF 75.4677539 MHz  
WDW EM  
SSB 0  
LB 1.00 Hz  
GB 0  
PC 1.40

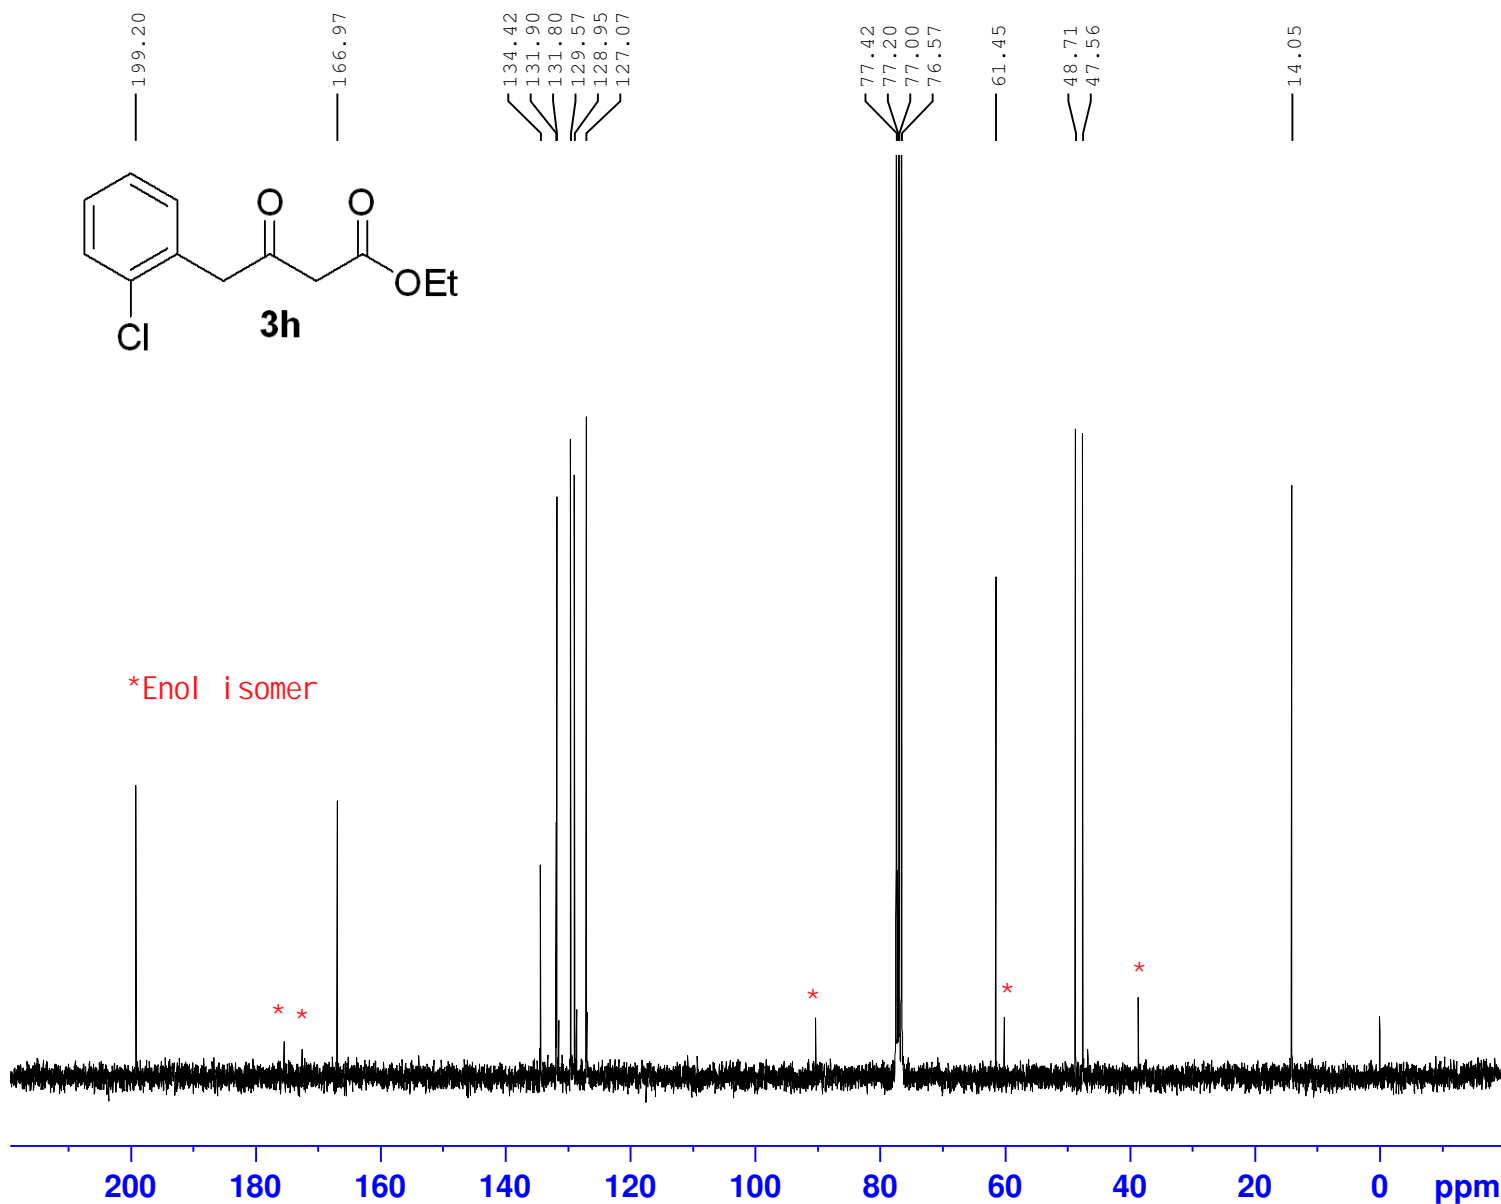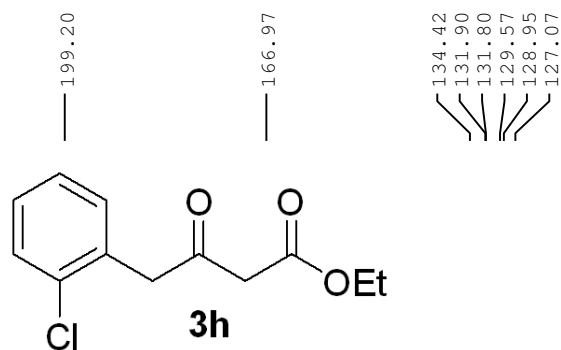



3sjwei 2565 zty-5-30-h 1h cdcl3

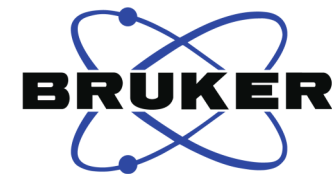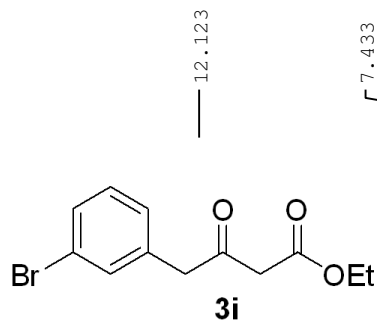

12.123

7.433  
7.429  
7.412  
7.406  
7.403  
7.370  
7.365  
7.360  
7.260  
7.239  
7.214  
7.188  
7.149  
7.123  
4.924  
4.220  
4.213  
4.196  
4.189  
4.172  
4.166  
4.148  
4.142  
3.813  
3.793  
3.465  
3.448  
2.272  
1.604  
1.306  
1.294  
1.282  
1.271  
1.258  
1.247

\*Enol isomer

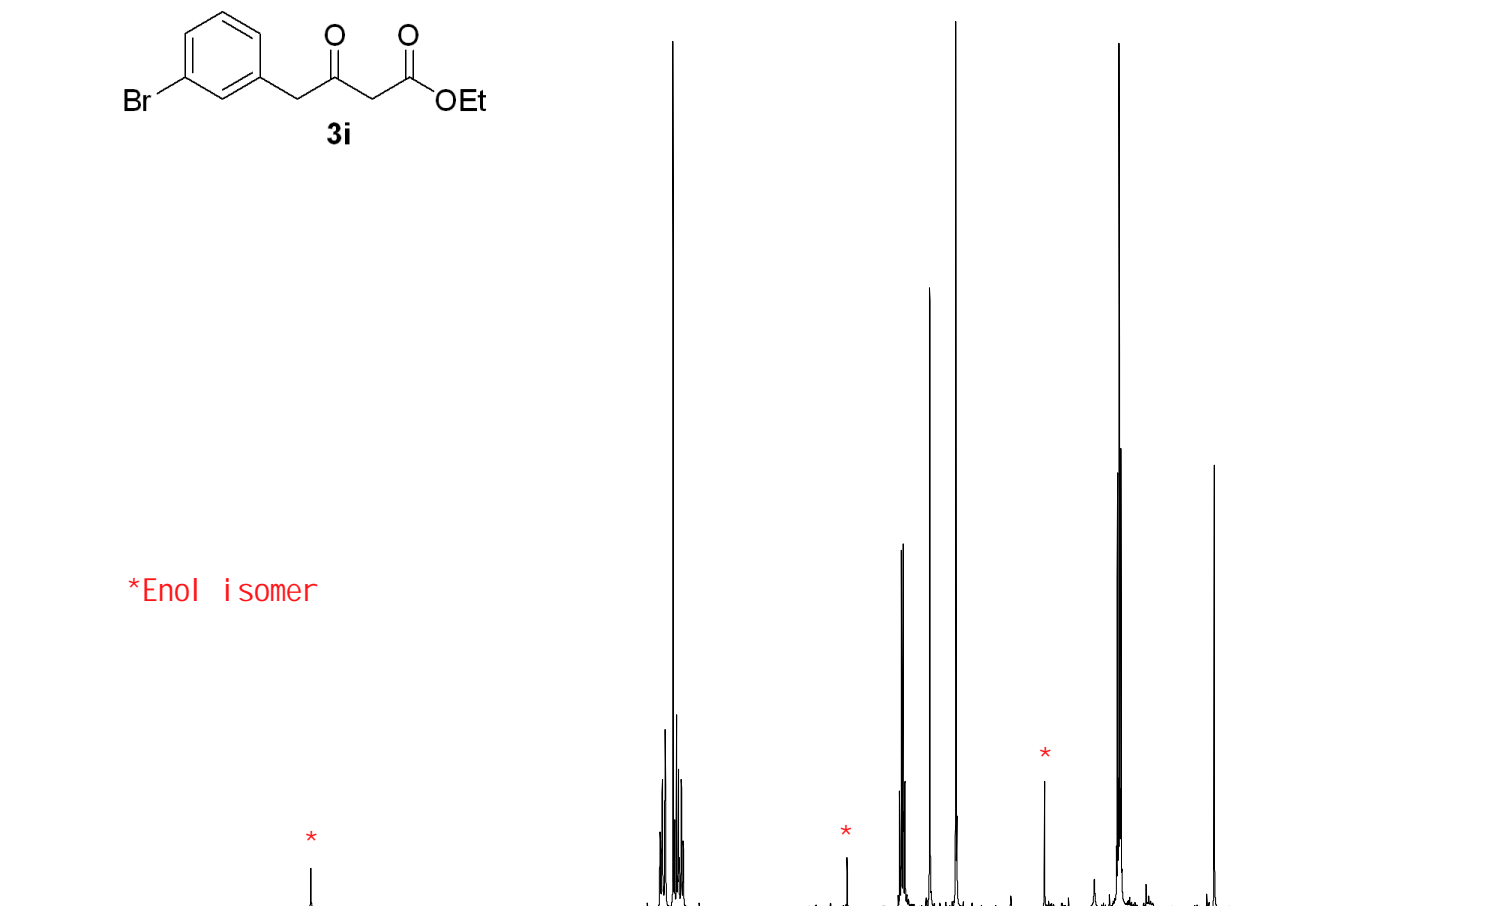

Current Data Parameters  
NAME ZTY-5-30-h-fr  
EXPNO 1  
PROCNO 1

F2 - Acquisition Parameters  
Date\_ 20210119  
Time 19.15  
INSTRUM spect  
PROBHD 5 mm PABBO BB-  
PULPROG zg30  
TD 65536  
SOLVENT CDC13  
NS 16  
DS 2  
SWH 6009.615 Hz  
FIDRES 0.091699 Hz  
AQ 5.4525952 sec  
RG 181  
DW 83.200 usec  
DE 6.50 usec  
TE 290.9 K  
D1 1.00000000 sec  
TD0 1

==== CHANNEL f1 =====  
SFO1 300.1318534 MHz  
NUC1 1H  
P1 10.00 usec  
PLW1 14.00000000 W

F2 - Processing parameters  
SI 65536  
SF 300.1300074 MHz  
WDW EM  
SSB 0  
LB 0.30 Hz  
GB 0  
PC 1.00

15 14 13 12 11 10 9 8 7 6 5 4 3 2 1 0 -1 -2 ppm

2.36  
1.40  
1.05

2.57  
2.00  
2.20  
0.31

4.63

3sjwei 2566 zty-5-30-c 13c cdcl3

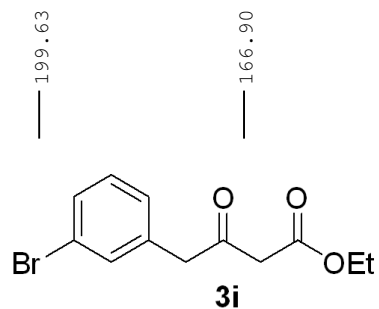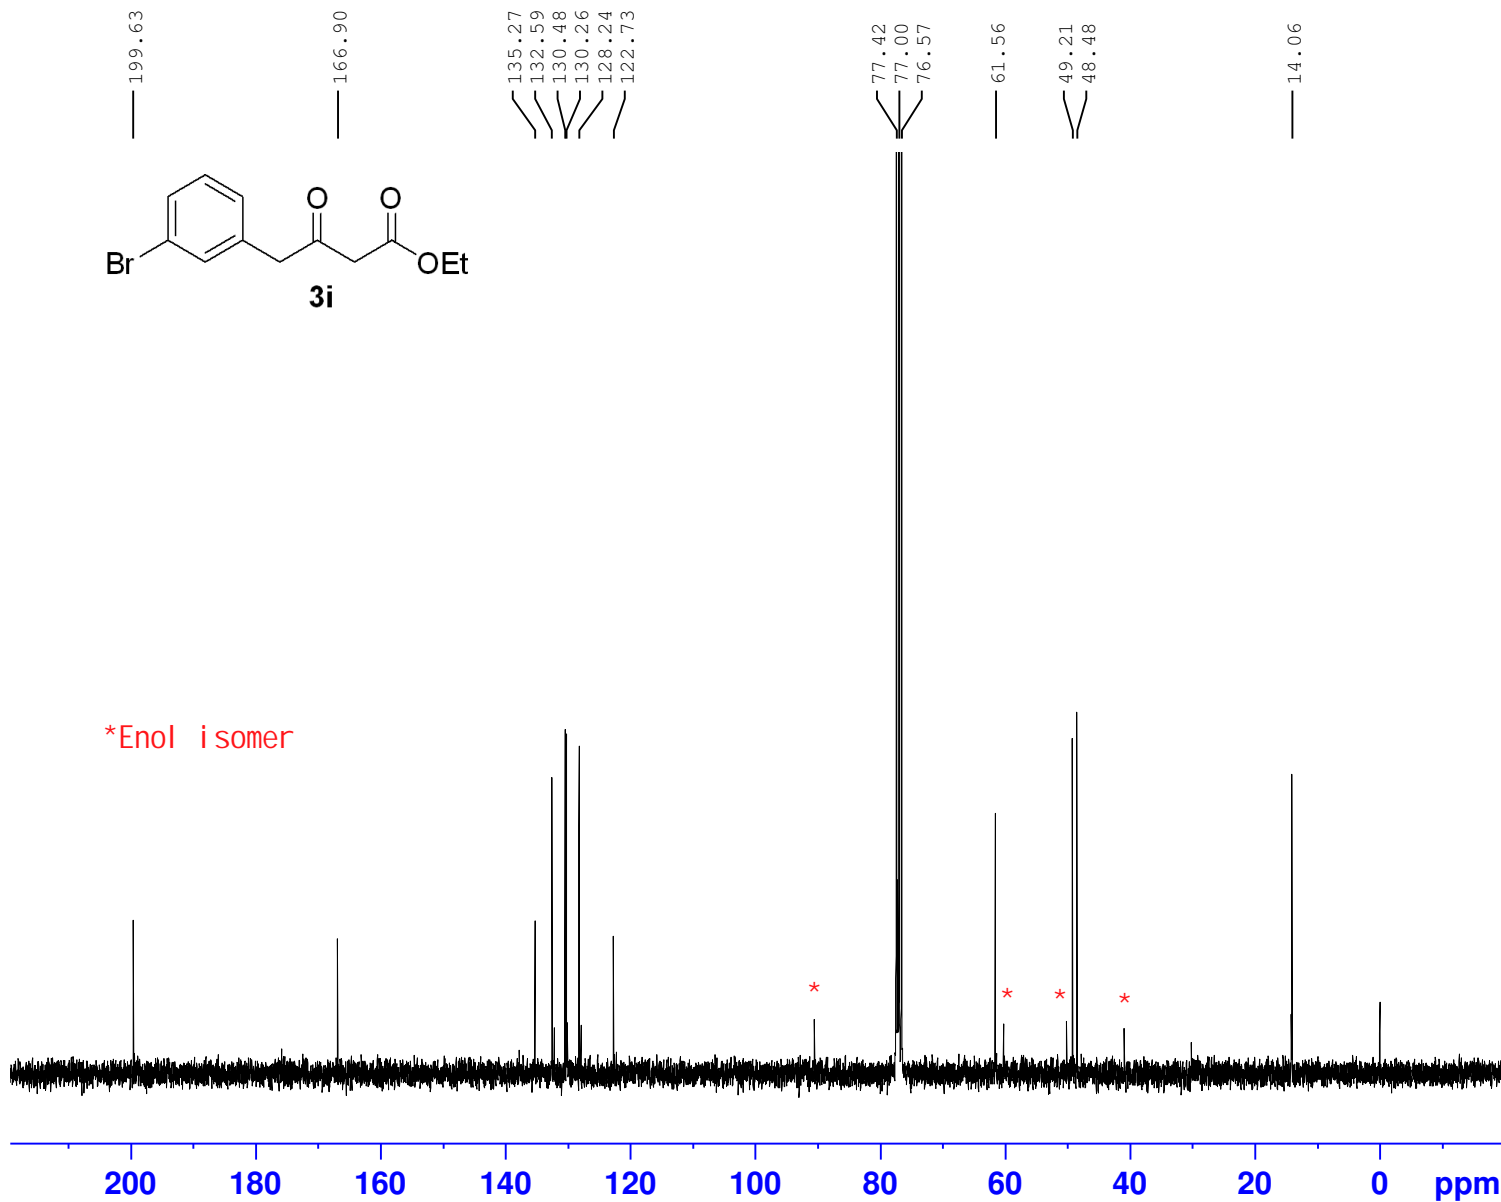

Current Data Parameters  
NAME ZTY-5-30-c-fr  
EXPNO 1  
PROCNO 1

F2 - Acquisition Parameters  
Date\_ 20210119  
Time 19.56  
INSTRUM spect  
PROBHD 5 mm PABBO BB-  
PULPROG zgpg30  
TD 65536  
SOLVENT CDC13  
NS 600  
DS 4  
SWH 18028.846 Hz  
FIDRES 0.275098 Hz  
AQ 1.8175317 sec  
RG 203  
DW 27.733 usec  
DE 6.50 usec  
TE 291.9 K  
D1 2.00000000 sec  
D11 0.03000000 sec  
TD0 1

==== CHANNEL f1 =====  
SFO1 75.4752949 MHz  
NUC1 13C  
P1 9.50 usec  
PLW1 34.20000076 W

==== CHANNEL f2 =====  
SFO2 300.1312005 MHz  
NUC2 1H  
CPDPRG[2] waltz16  
PCPD2 90.00 usec  
PLW2 14.00000000 W  
PLW12 0.17284000 W  
PLW13 0.14000000 W

F2 - Processing parameters  
SI 32768  
SF 75.4677527 MHz  
WDW EM  
SSB 0  
LB 1.00 Hz  
GB 0  
PC 1.40

3sjwei 2511 zty-5-23-h 1h cdcl3



Current Data Parameters  
NAME ZTY-5-23-h-fr  
EXPNO 1  
PROCNO 1

F2 - Acquisition Parameters  
Date\_ 20210115  
Time 12.41  
INSTRUM spect  
PROBHD 5 mm PABBO BB-  
PULPROG zg30  
TD 65536  
SOLVENT CDC13  
NS 16  
DS 2  
SWH 6009.615 Hz  
FIDRES 0.091699 Hz  
AQ 5.4525952 sec  
RG 181  
DW 83.200 usec  
DE 6.50 usec  
TE 291.0 K  
D1 1.00000000 sec  
TD0 1

==== CHANNEL f1 =====  
SFO1 300.1318534 MHz  
NUC1 1H  
P1 10.00 usec  
PLW1 14.00000000 W

F2 - Processing parameters  
SI 65536  
SF 300.1300073 MHz  
WDW EM  
SSB 0  
LB 0.30 Hz  
GB 0  
PC 1.00

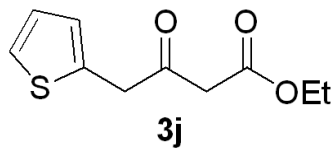

12.158

7.260  
7.253  
7.239  
7.235  
7.002  
6.990  
6.985  
6.973  
6.922  
6.919  
6.911  
6.907

5.001  
4.224  
4.200  
4.190  
4.176  
4.166  
4.152  
4.038  
3.709  
3.499

1.306  
1.295  
1.282  
1.272  
1.258  
1.248

\*Enol isomer

\*

\*

\*

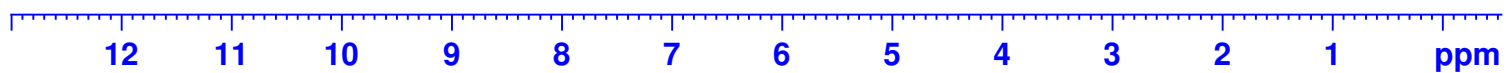

1.20  
1.09  
1.07

2.30  
2.00  
1.98

3.83

3sjwei 2640 zty-5-23-c 13c cdcl3

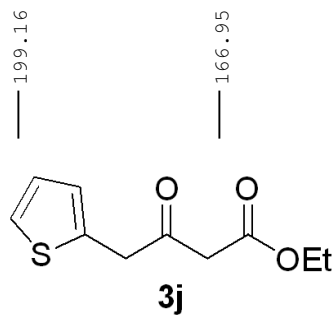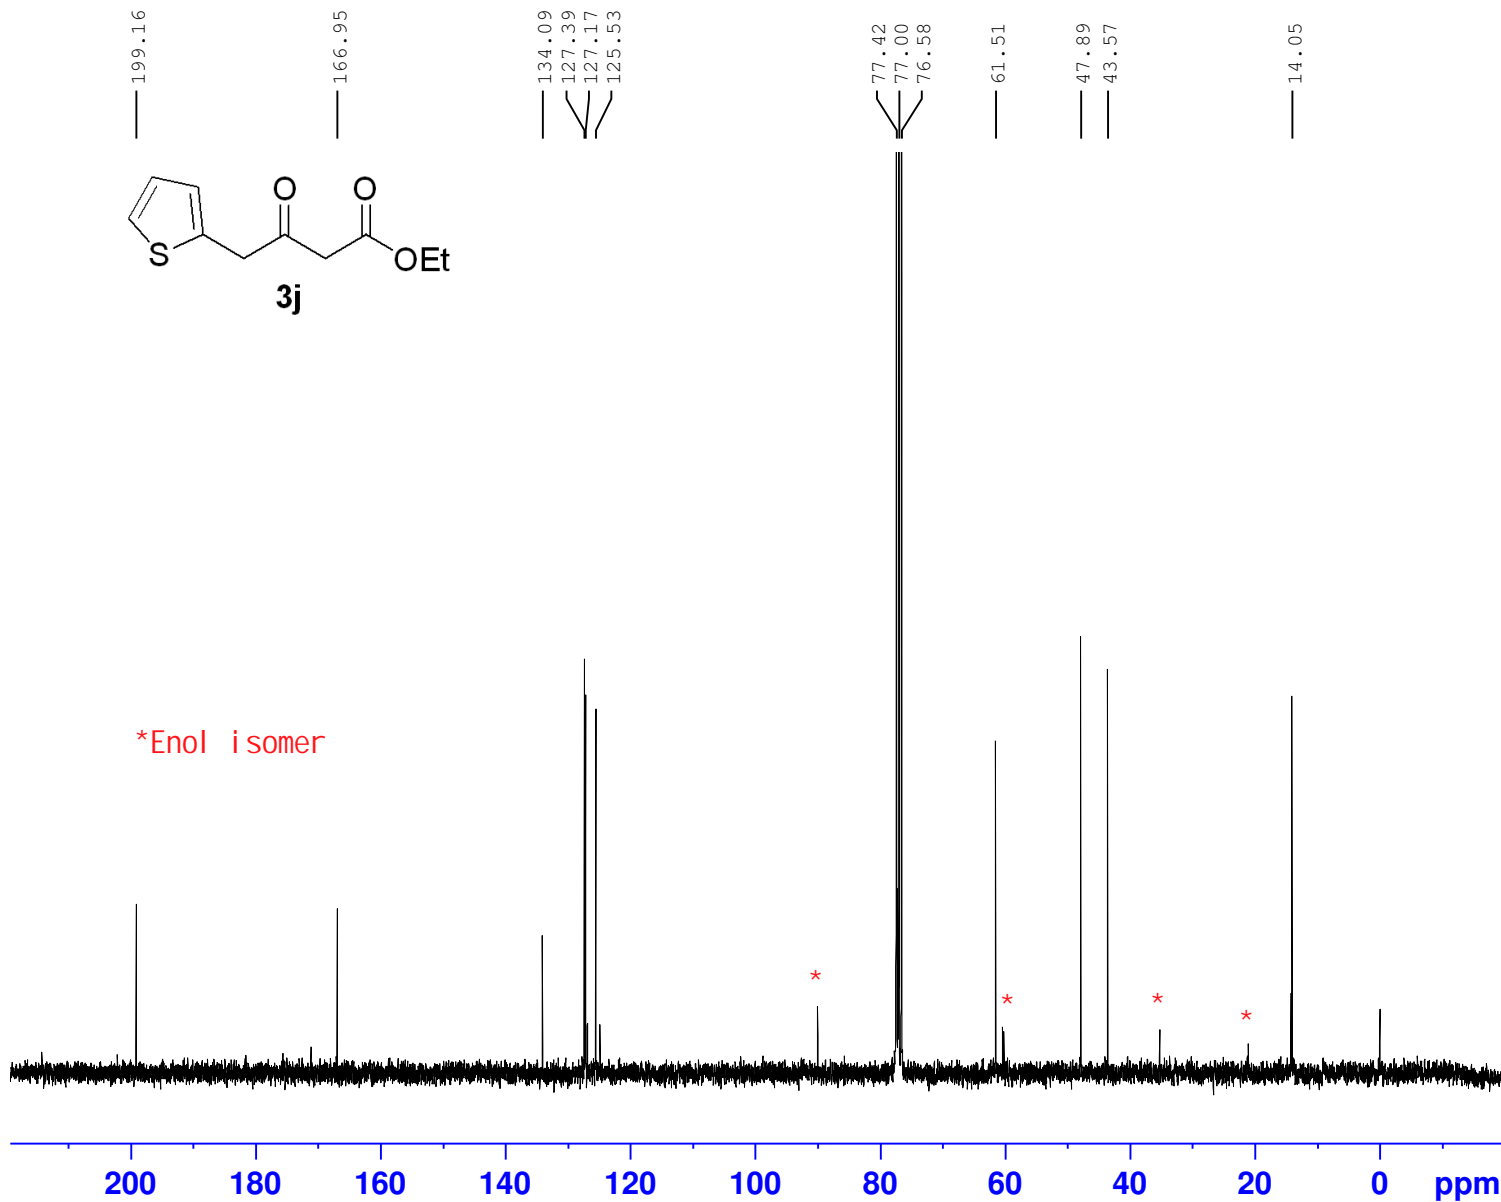

Current Data Parameters  
NAME ZTY-5-23-c-fr  
EXPNO 1  
PROCNO 1

F2 - Acquisition Parameters  
Date\_ 20210123  
Time 18.48  
INSTRUM spect  
PROBHD 5 mm PABBO BB-  
PULPROG zgpg30  
TD 65536  
SOLVENT CDCl3  
NS 800  
DS 4  
SWH 18028.846 Hz  
FIDRES 0.275098 Hz  
AQ 1.8175317 sec  
RG 203  
DW 27.733 usec  
DE 6.50 usec  
TE 292.1 K  
D1 2.00000000 sec  
D11 0.03000000 sec  
TD0 1

=====  
CHANNEL f1  
SFO1 75.4752949 MHz  
NUC1 13C  
P1 9.50 usec  
PLW1 34.20000076 W

=====  
CHANNEL f2  
SFO2 300.1312005 MHz  
NUC2 1H  
CPDPRG[2] waltz16  
PCPD2 90.00 usec  
PLW2 14.00000000 W  
PLW12 0.17284000 W  
PLW13 0.14000000 W

F2 - Processing parameters  
SI 32768  
SF 75.4677530 MHz  
WDW EM  
SSB 0  
LB 1.00 Hz  
GB 0  
PC 1.40

3sjwei 2833 zty-5-10j 1h cdcl3



Current Data Parameters  
NAME ZTY-5-10j-h-fr  
EXPNO 1  
PROCNO 1

F2 - Acquisition Parameters  
Date\_ 20210401  
Time 1.42  
INSTRUM spect  
PROBHD 5 mm PABBO BB-  
PULPROG zg30  
TD 65536  
SOLVENT CDC13  
NS 16  
DS 2  
SWH 6009.615 Hz  
FIDRES 0.091699 Hz  
AQ 5.4525952 sec  
RG 90.5  
DW 83.200 usec  
DE 6.50 usec  
TE 296.2 K  
D1 1.00000000 sec  
TD0 1

==== CHANNEL f1 =====  
SFO1 300.1318534 MHz  
NUC1 1H  
P1 10.00 usec  
PLW1 14.00000000 W

F2 - Processing parameters  
SI 65536  
SF 300.1300070 MHz  
WDW EM  
SSB 0  
LB 0.30 Hz  
GB 0  
PC 1.00

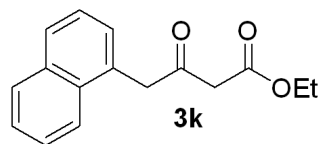

\*Enol isomer

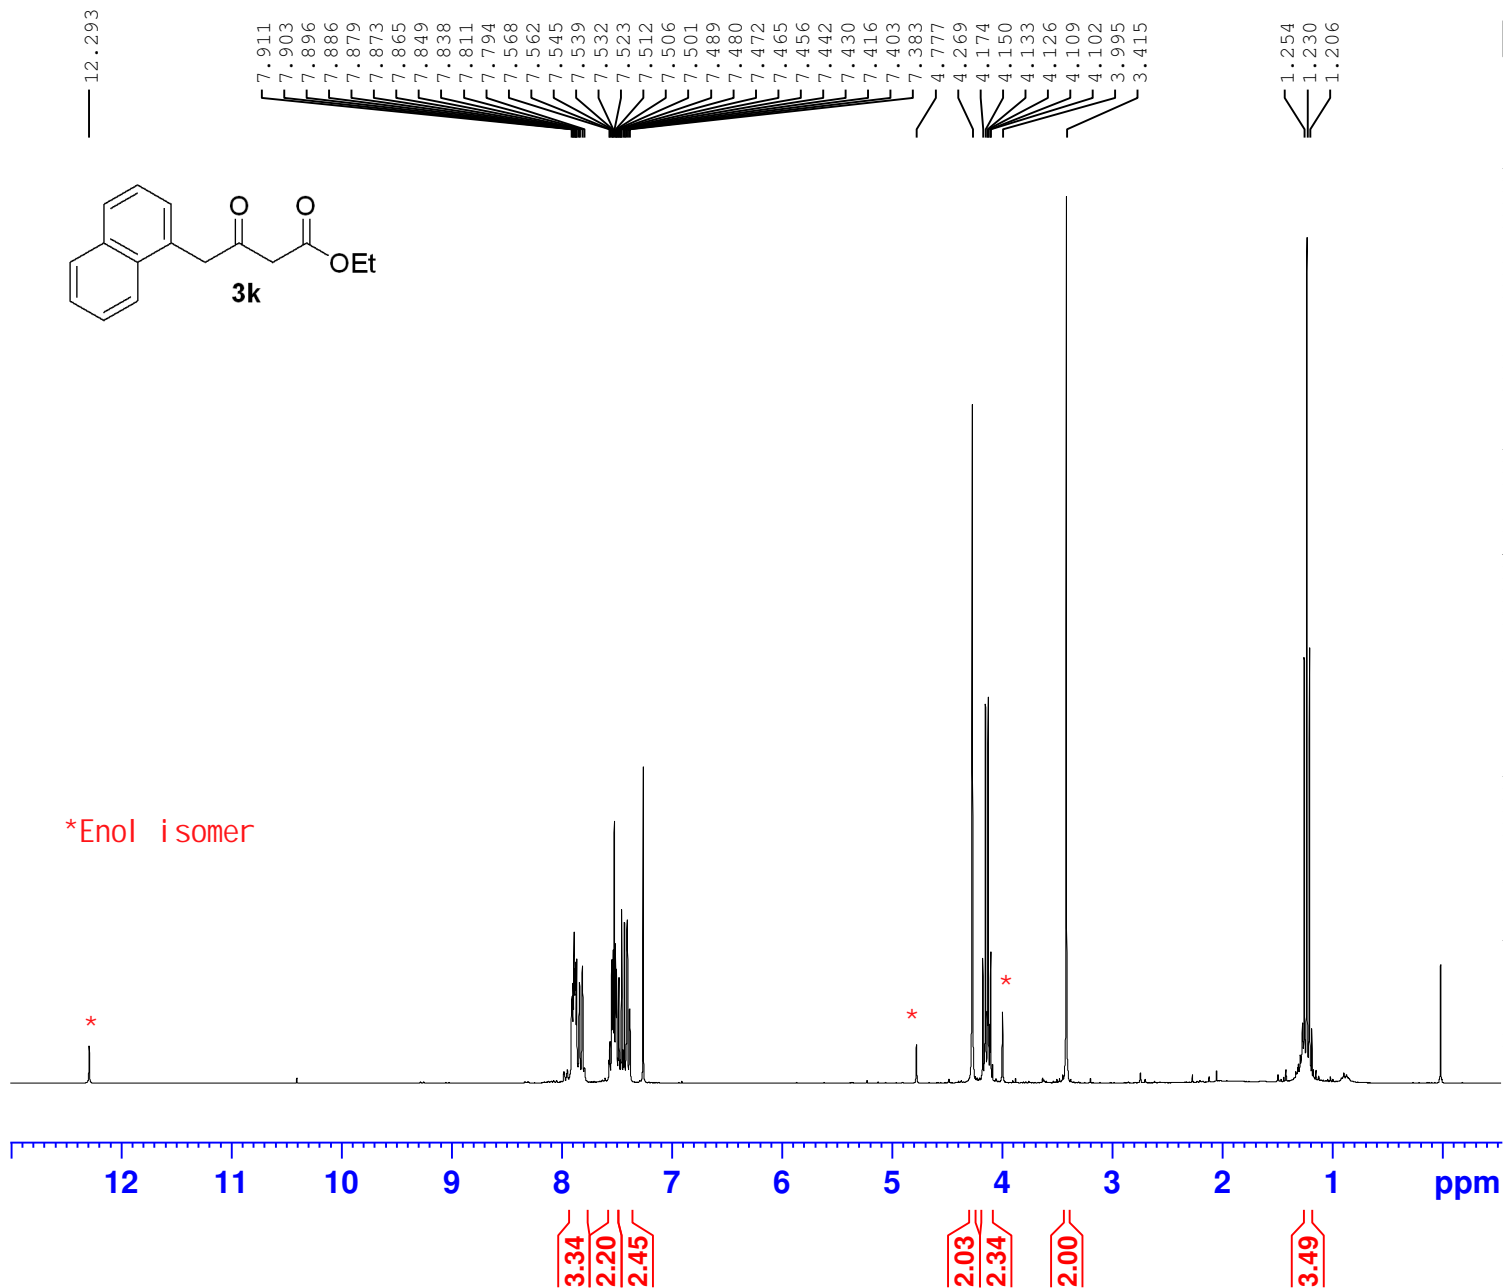

3sjwei 2834 zty-5-10j 13c cdcl3



200.90  
167.12  
133.84  
132.13  
129.88  
128.76  
128.47  
128.38  
126.65  
125.97  
123.66  
77.42  
77.00  
76.57  
61.35  
48.24  
47.83  
13.97

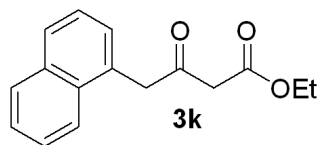

\*Enol isomer

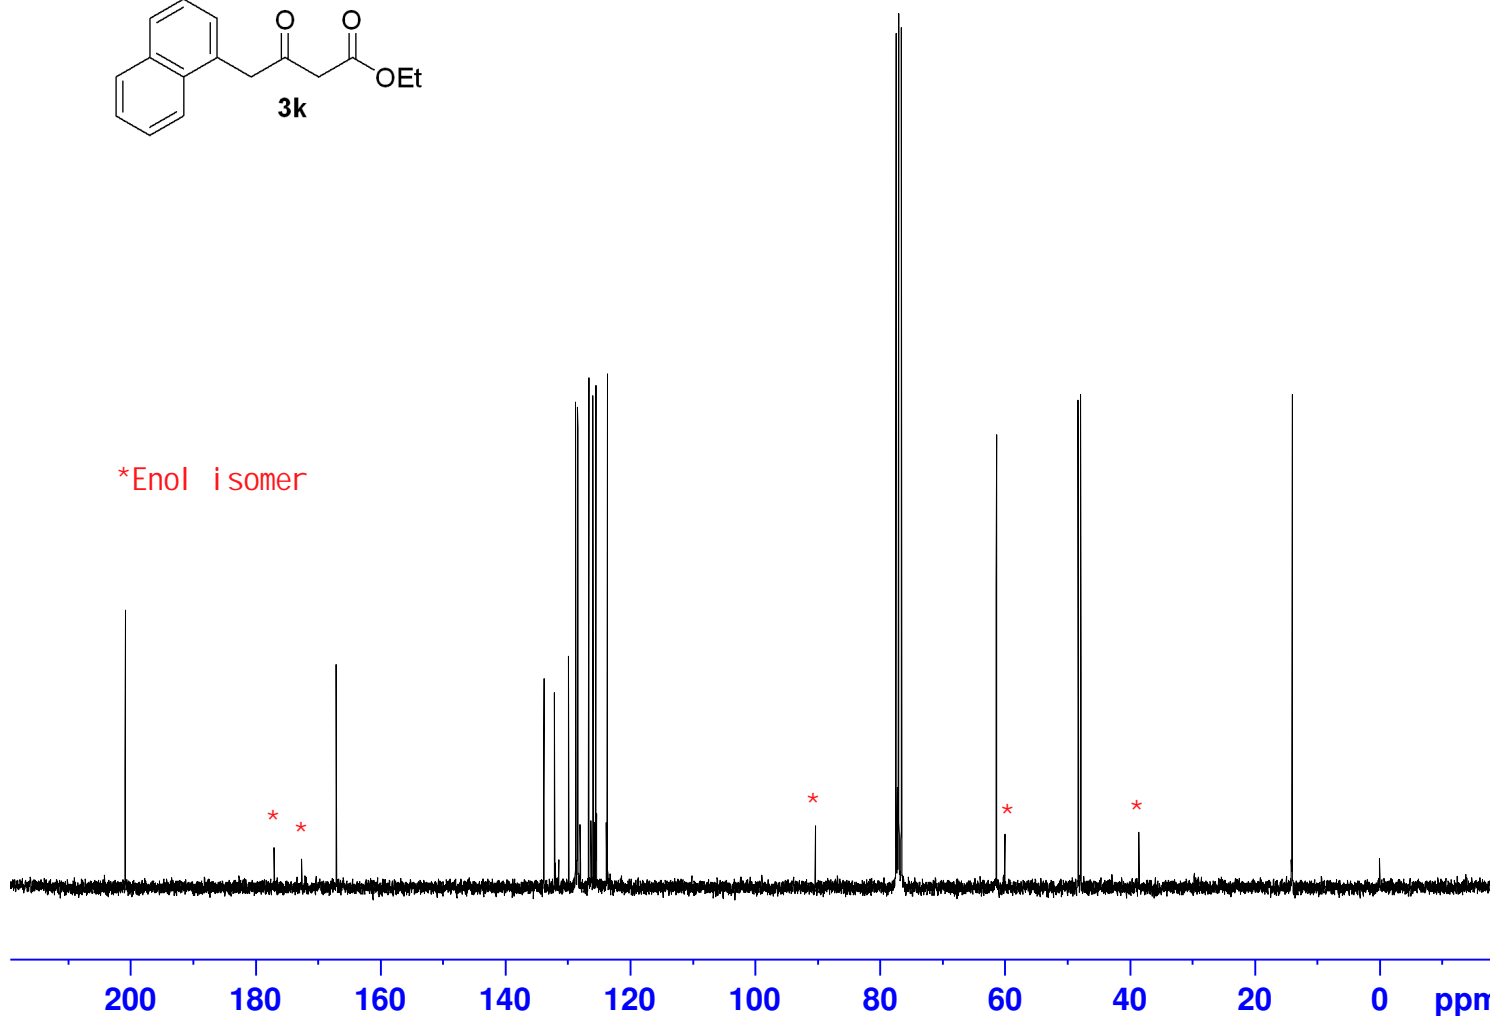

Current Data Parameters  
NAME ZTY-5-10j-c-fr  
EXPNO 1  
PROCNO 1

F2 - Acquisition Parameters  
Date\_ 20210401  
Time 2.29  
INSTRUM spect  
PROBHD 5 mm PABBO BB-  
PULPROG zgpg30  
TD 65536  
SOLVENT CDCl3  
NS 700  
DS 4  
SWH 18028.846 Hz  
FIDRES 0.275098 Hz  
AQ 1.8175317 sec  
RG 203  
DW 27.733 usec  
DE 6.50 usec  
TE 296.2 K  
D1 2.00000000 sec  
D11 0.03000000 sec  
TD0 1

==== CHANNEL f1 =====  
SFO1 75.4752949 MHz  
NUC1 13C  
P1 9.50 usec  
PLW1 34.20000076 W

==== CHANNEL f2 =====  
SFO2 300.1312005 MHz  
NUC2 1H  
CPDPRG[2] waltz16  
PCPD2 90.00 usec  
PLW2 14.00000000 W  
PLW12 0.17284000 W  
PLW13 0.14000000 W

F2 - Processing parameters  
SI 32768  
SF 75.4677552 MHz  
WDW EM  
SSB 0  
LB 1.00 Hz  
GB 0  
PC 1.40

4sunjianwei5/136 zty-5-20b-h



Current Data Parameters  
NAME ZTY-5-20b-h-fr  
EXPNO 1  
PROCNO 1

F2 - Acquisition Parameters  
Date\_ 20210113  
Time 14.41  
INSTRUM spect  
PROBHD 5 mm PABBO BB-  
PULPROG zg30  
TD 65536  
SOLVENT CDC13  
NS 6  
DS 2  
SWH 8223.685 Hz  
FIDRES 0.125483 Hz  
AQ 3.9845889 sec  
RG 100.49  
DW 60.800 usec  
DE 6.50 usec  
TE 292.4 K  
D1 1.00000000 sec  
TD0 1

==== CHANNEL f1 =====  
NUC1 1H  
P1 14.40 usec  
PLW1 14.00000000 W  
SFO1 400.1924713 MHz

F2 - Processing parameters  
SI 65536  
SF 400.1900154 MHz  
WDW EM  
SSB 0  
LB 0.30 Hz  
GB 0  
PC 1.00

12.108

7.260  
6.775  
6.756  
6.677  
6.653  
6.633  
5.944  
5.935

4.905  
4.199  
4.181  
4.171  
4.163  
4.154  
4.145  
3.849  
3.726  
3.438  
3.404

2.214

1.278  
1.260  
1.243

-0.009

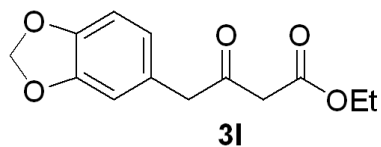

\*Enol isomer

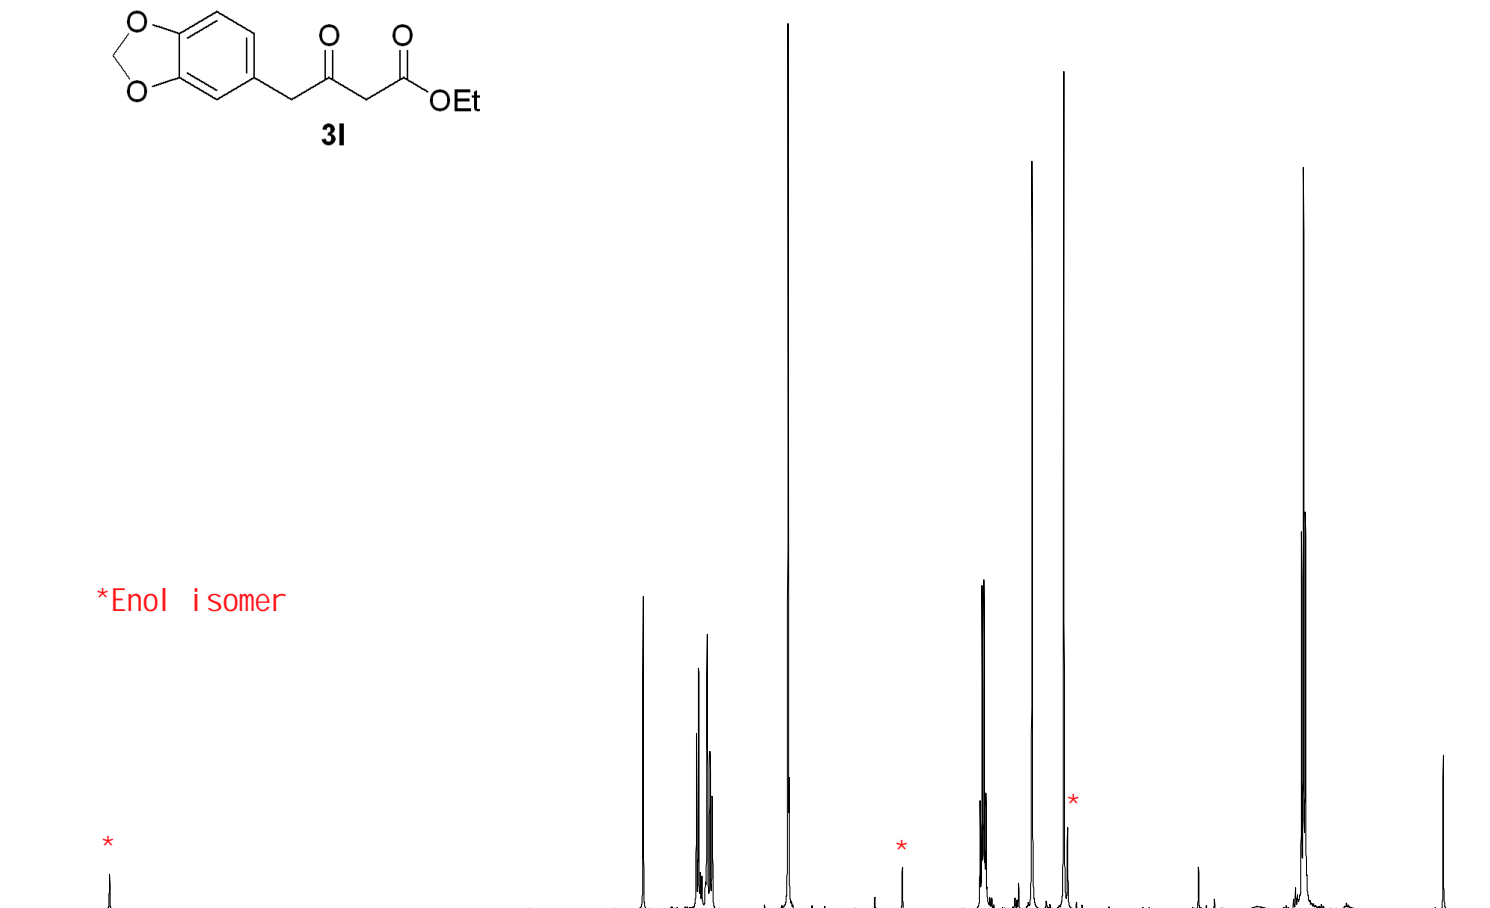

12

11

10

9

8

7

6

5

4

3

2

1

ppm

1.24

2.08

2.32

2.27

2.00

1.99

3.82

3sjwei 2506 zty-5-20b-c-fr 13c cdcl3



Current Data Parameters  
NAME ZTY-5-20b-c-fr  
EXPNO 1  
PROCNO 1

F2 - Acquisition Parameters  
Date\_ 20210114  
Time 11.38  
INSTRUM spect  
PROBHD 5 mm PABBO BB-  
PULPROG zgpg30  
TD 65536  
SOLVENT CDC13  
NS 650  
DS 4  
SWH 18028.846 Hz  
FIDRES 0.275098 Hz  
AQ 1.8175317 sec  
RG 203  
DW 27.733 usec  
DE 6.50 usec  
TE 291.1 K  
D1 2.00000000 sec  
D11 0.03000000 sec  
TD0 1

==== CHANNEL f1 =====  
SFO1 75.4752949 MHz  
NUC1 13C  
P1 9.50 usec  
PLW1 34.20000076 W

==== CHANNEL f2 =====  
SFO2 300.1312005 MHz  
NUC2 1H  
CPDPRG[2] waltz16  
PCPD2 90.00 usec  
PLW2 14.00000000 W  
PLW12 0.17284000 W  
PLW13 0.14000000 W

F2 - Processing parameters  
SI 32768  
SF 75.4677541 MHz  
WDW EM  
SSB 0  
LB 1.00 Hz  
GB 0  
PC 1.40

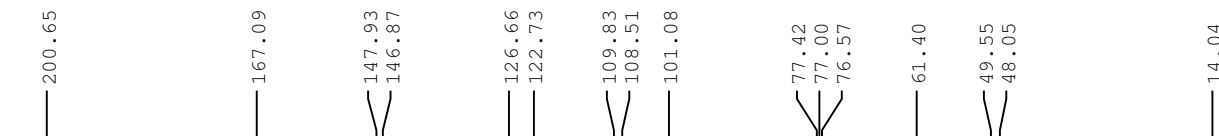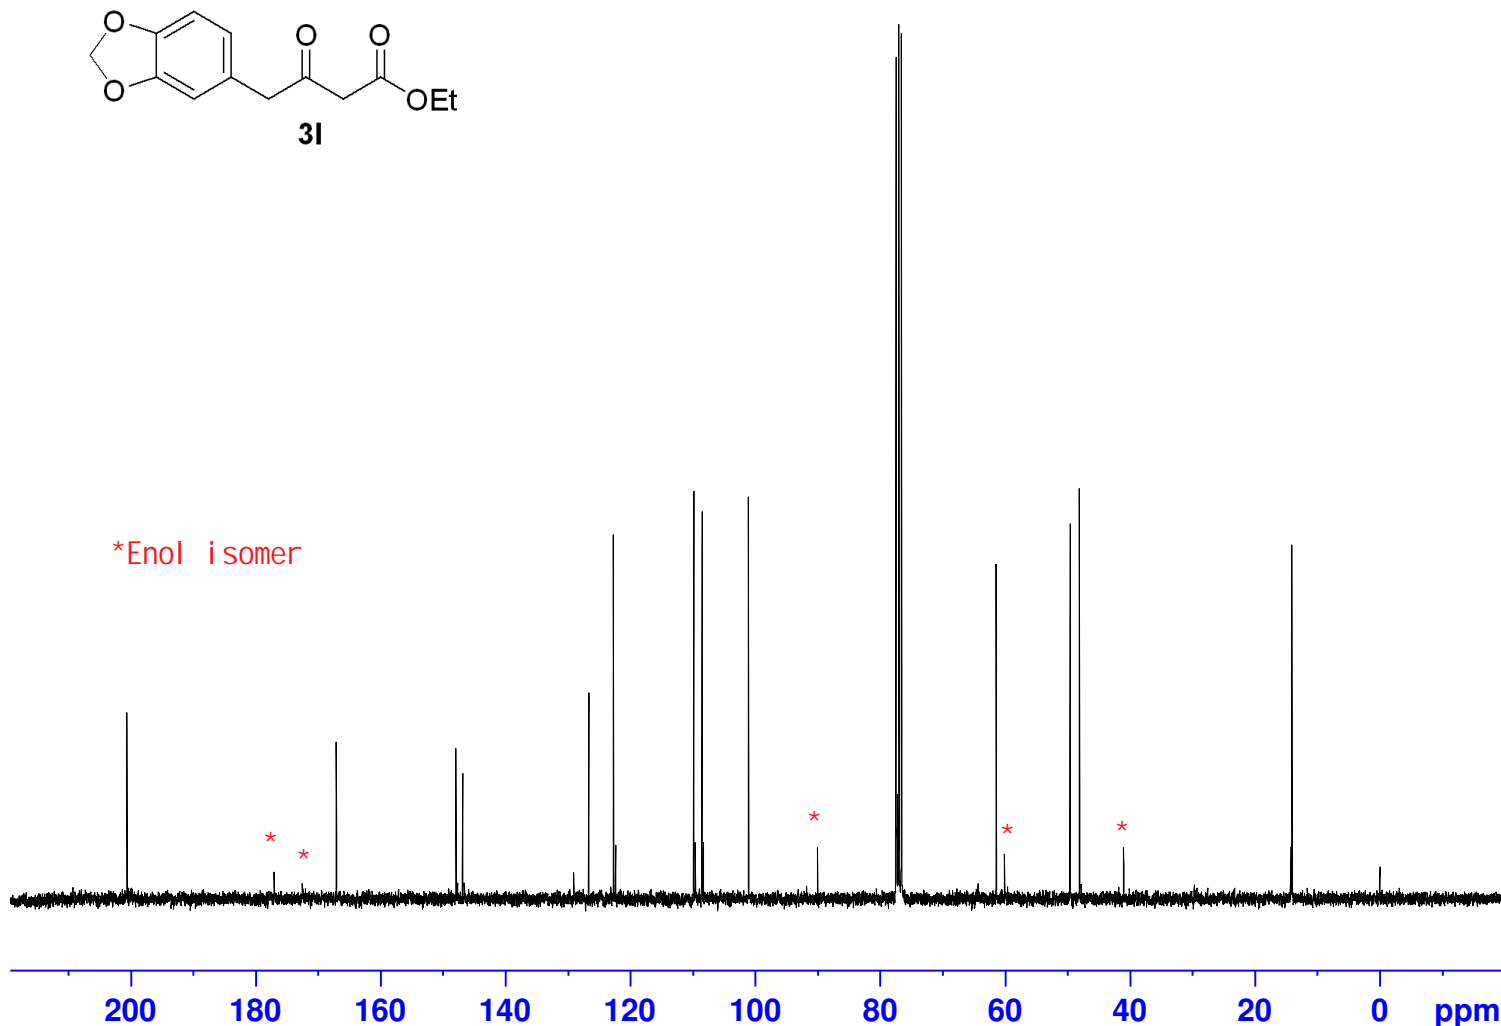



3sjwei 1762 zty-5-8a 1h cdcl3



Current Data Parameters  
NAME ZTY-5-8a-h-fr  
EXPNO 1  
PROCNO 1

F2 - Acquisition Parameters  
Date\_ 20201110  
Time 20.12  
INSTRUM spect  
PROBHD 5 mm PABBO BB-  
PULPROG zg30  
TD 65536  
SOLVENT CDC13  
NS 16  
DS 2  
SWH 6009.615 Hz  
FIDRES 0.091699 Hz  
AQ 5.4525952 sec  
RG 161  
DW 83.200 usec  
DE 6.50 usec  
TE 304.4 K  
D1 1.00000000 sec  
TD0 1

==== CHANNEL f1 =====  
SFO1 300.1318534 MHz  
NUC1 1H  
P1 10.00 usec  
PLW1 14.00000000 W

F2 - Processing parameters  
SI 65536  
SF 300.1300074 MHz  
WDW EM  
SSB 0  
LB 0.30 Hz  
GB 0  
PC 1.00

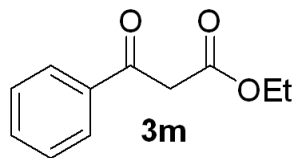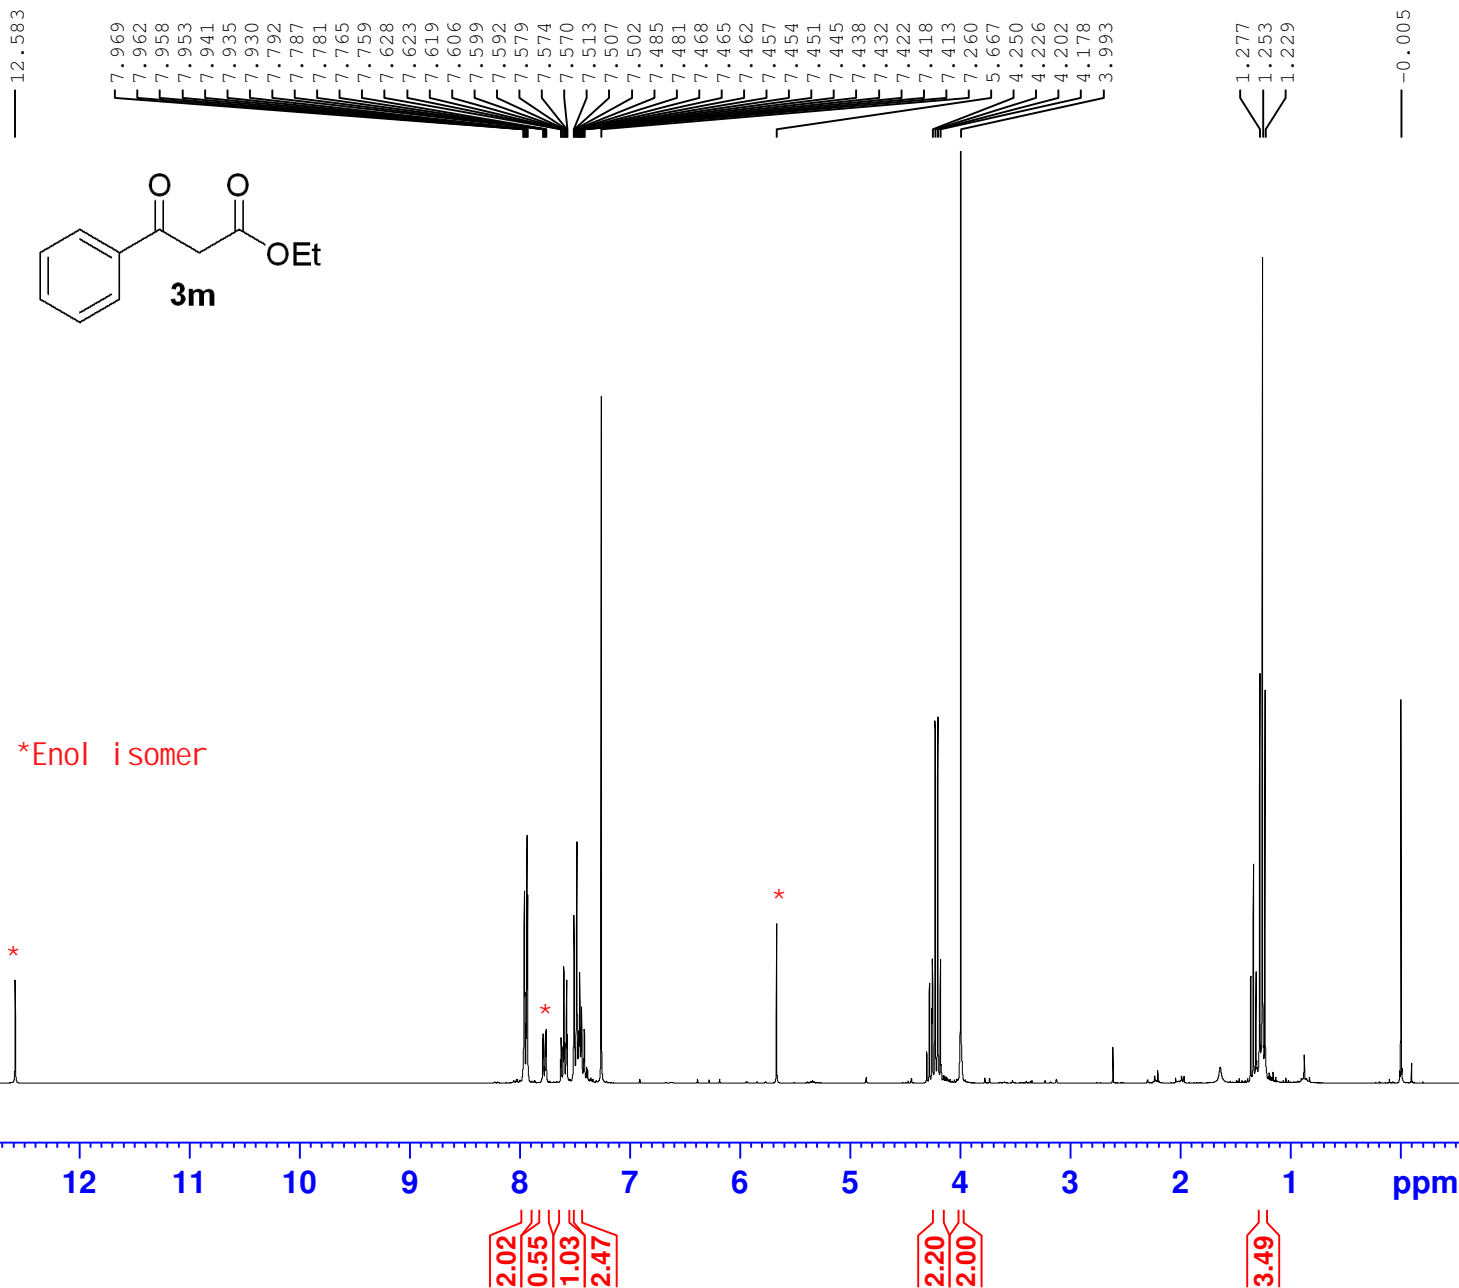

3sjwei 2836 zty-5-8a 13c cdcl3

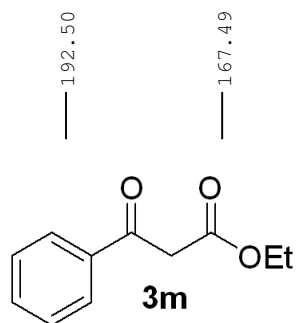

192.50

167.49

133.70

128.75

128.47

126.01

77.42

77.00

76.57

61.46

45.98

14.04

\*Enol isomer

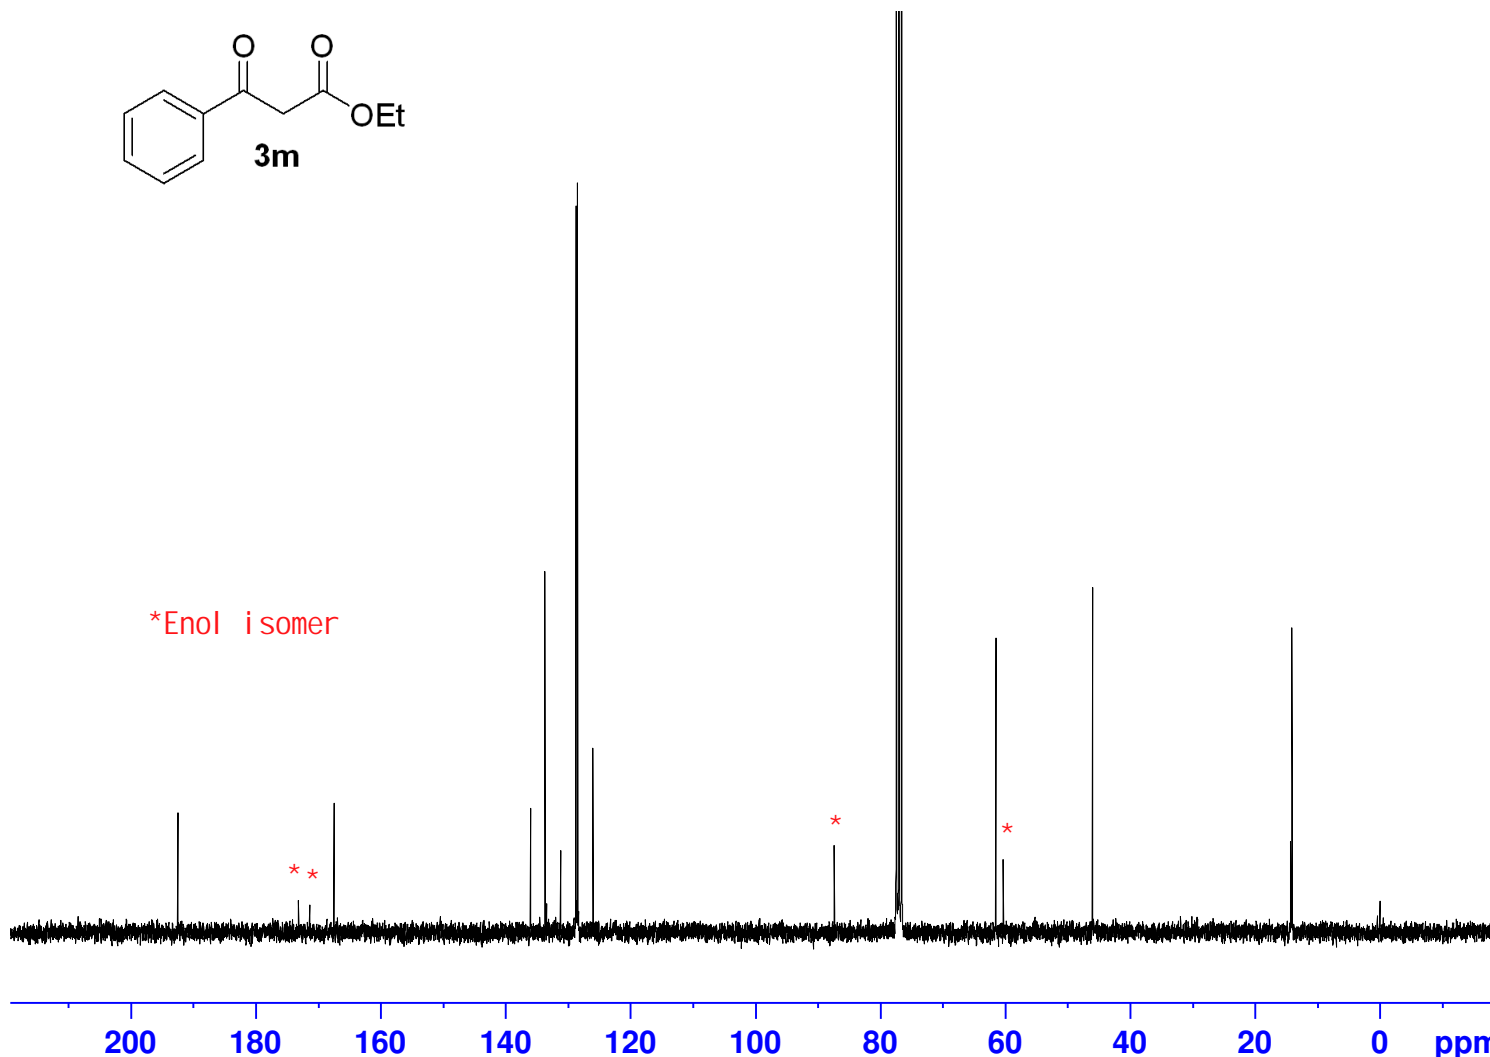

Current Data Parameters  
NAME ZTY-5-8a-c-fr  
EXPNO 1  
PROCNO 1

F2 - Acquisition Parameters  
Date\_ 20210401  
Time 4.06  
INSTRUM spect  
PROBHD 5 mm PABBO BB-  
PULPROG zgpg30  
TD 65536  
SOLVENT CDCl3  
NS 700  
DS 4  
SWH 18028.846 Hz  
FIDRES 0.275098 Hz  
AQ 1.8175317 sec  
RG 203  
DW 27.733 usec  
DE 6.50 usec  
TE 296.2 K  
D1 2.00000000 sec  
D11 0.03000000 sec  
TD0 1

==== CHANNEL f1 =====  
SFO1 75.4752949 MHz  
NUC1 13C  
P1 9.50 usec  
PLW1 34.20000076 W

==== CHANNEL f2 =====  
SFO2 300.1312005 MHz  
NUC2 1H  
CPDPRG[2] waltz16  
PCPD2 90.00 usec  
PLW2 14.00000000 W  
PLW12 0.17284000 W  
PLW13 0.14000000 W

F2 - Processing parameters  
SI 32768  
SF 75.4677519 MHz  
WDW EM  
SSB 0  
LB 1.00 Hz  
GB 0  
PC 1.40

4sunjianwei5/23 zty-5-14-1

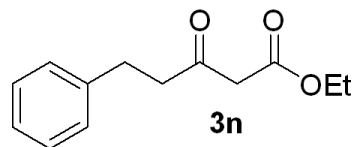

7.302  
7.283  
7.265  
7.260  
7.215  
7.194  
7.192  
7.174

4.204  
4.186  
4.168  
4.151  
3.423  
2.951  
2.942  
2.937  
2.925  
2.910  
2.894  
2.878  
2.867  
2.862  
2.853  
1.280  
1.262  
1.244

Current Data Parameters  
NAME ZTY-5-14a-h-fr  
EXPNO 1  
PROCNO 1

F2 - Acquisition Parameters  
Date\_ 20201210  
Time 14.36  
INSTRUM spect  
PROBHD 5 mm PABBO BB-  
PULPROG zg30  
TD 65536  
SOLVENT CDCl3  
NS 8  
DS 2  
SWH 8223.685 Hz  
FIDRES 0.125483 Hz  
AQ 3.9845889 sec  
RG 125.76  
DW 60.800 usec  
DE 6.50 usec  
TE 294.8 K  
D1 1.00000000 sec  
TD0 1

==== CHANNEL f1 =====  
NUC1 1H  
P1 14.40 usec  
PLW1 14.00000000 W  
SFO1 400.1924713 MHz

F2 - Processing parameters  
SI 65536  
SF 400.1900154 MHz  
WDW EM  
SSB 0  
LB 0.30 Hz  
GB 0  
PC 1.00

\*Enol isomer

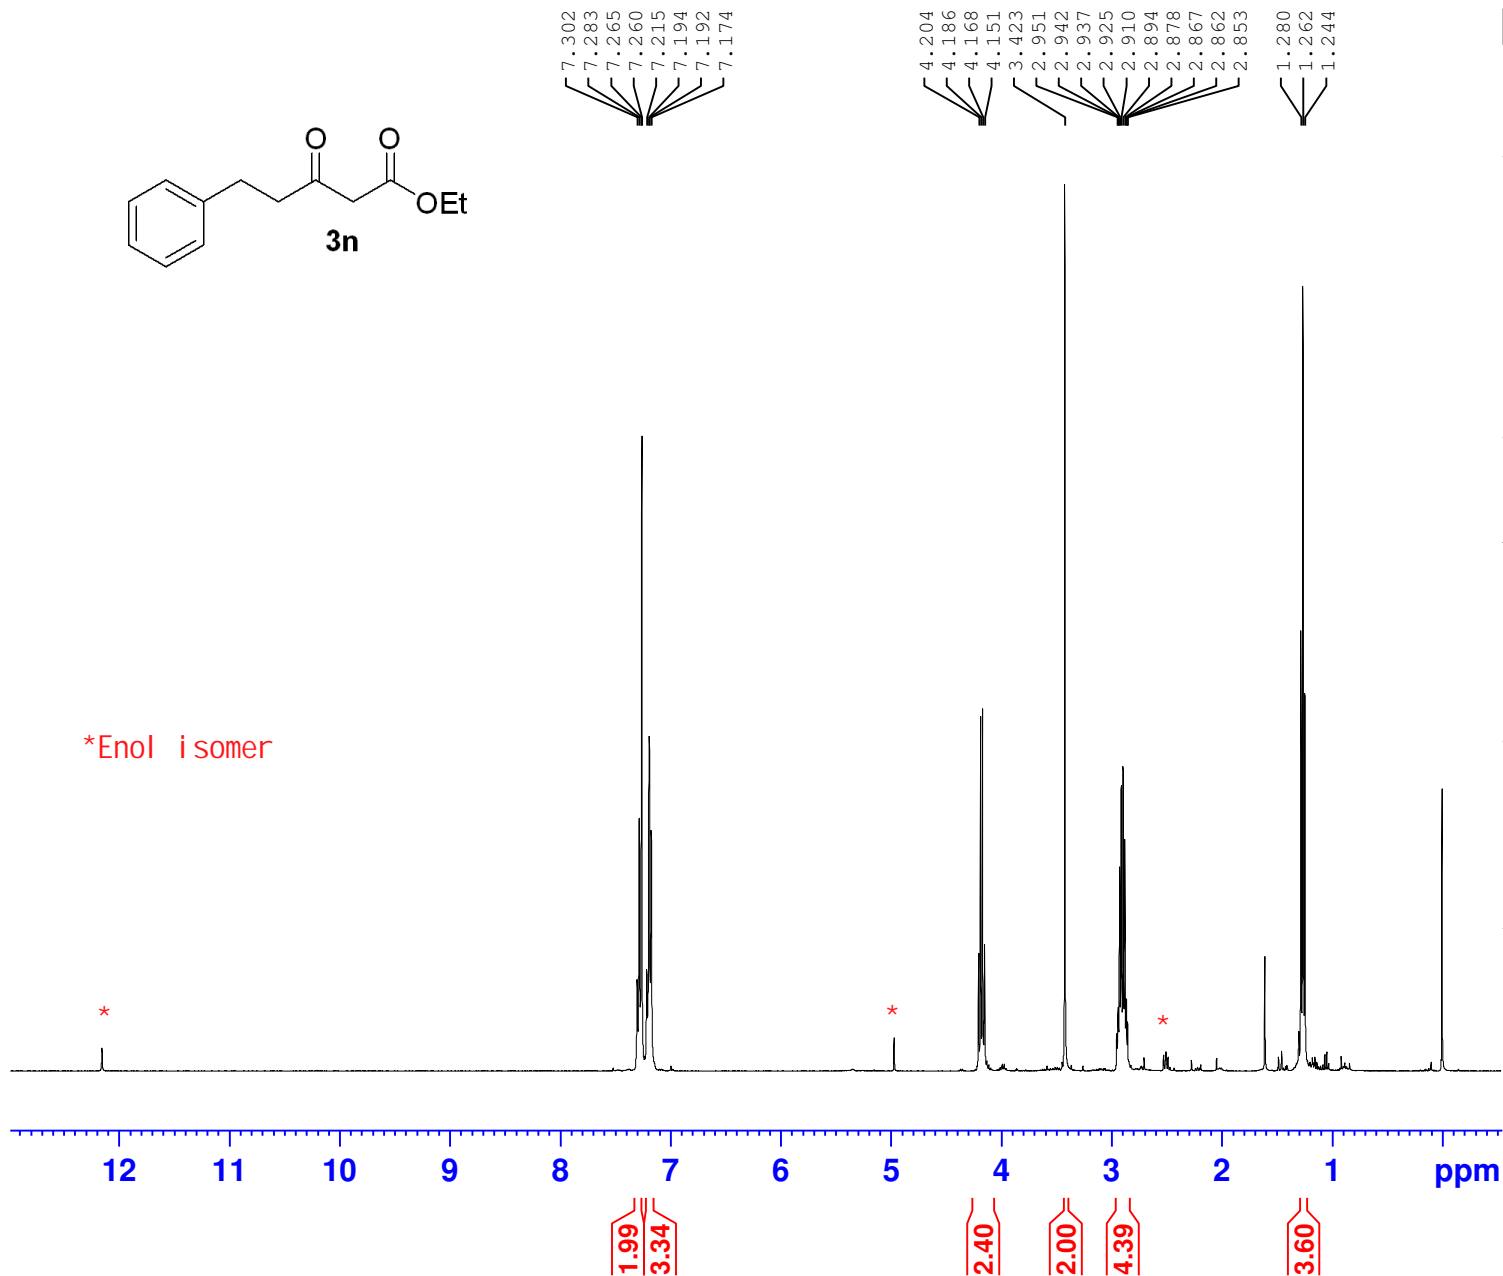

3sjwei 2394 zty-5-14a-1 13c cdcl3

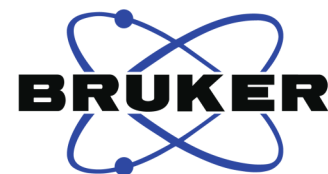

Current Data Parameters  
NAME ZTY-5-14a-c-fr  
EXPNO 1  
PROCNO 1

F2 - Acquisition Parameters  
Date\_ 20210105  
Time 13.09  
INSTRUM spect  
PROBHD 5 mm PABBO BB-  
PULPROG zgpg30  
TD 65536  
SOLVENT CDC13  
NS 650  
DS 4  
SWH 18028.846 Hz  
FIDRES 0.275098 Hz  
AQ 1.8175317 sec  
RG 203  
DW 27.733 usec  
DE 6.50 usec  
TE 290.5 K  
D1 2.00000000 sec  
D11 0.03000000 sec  
TD0 1

=====  
CHANNEL f1  
SFO1 75.4752949 MHz  
NUC1 13C  
P1 9.50 usec  
PLW1 34.20000076 W

=====  
CHANNEL f2  
SFO2 300.1312005 MHz  
NUC2 1H  
CPDPRG[2] waltz16  
PCPD2 90.00 usec  
PLW2 14.00000000 W  
PLW12 0.17284000 W  
PLW13 0.14000000 W

F2 - Processing parameters  
SI 32768  
SF 75.4677535 MHz  
WDW EM  
SSB 0  
LB 1.00 Hz  
GB 0  
PC 1.40

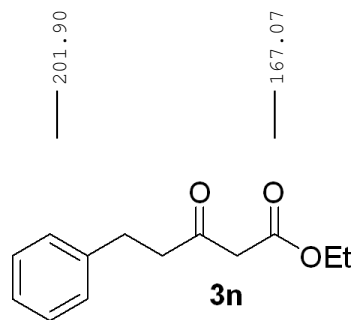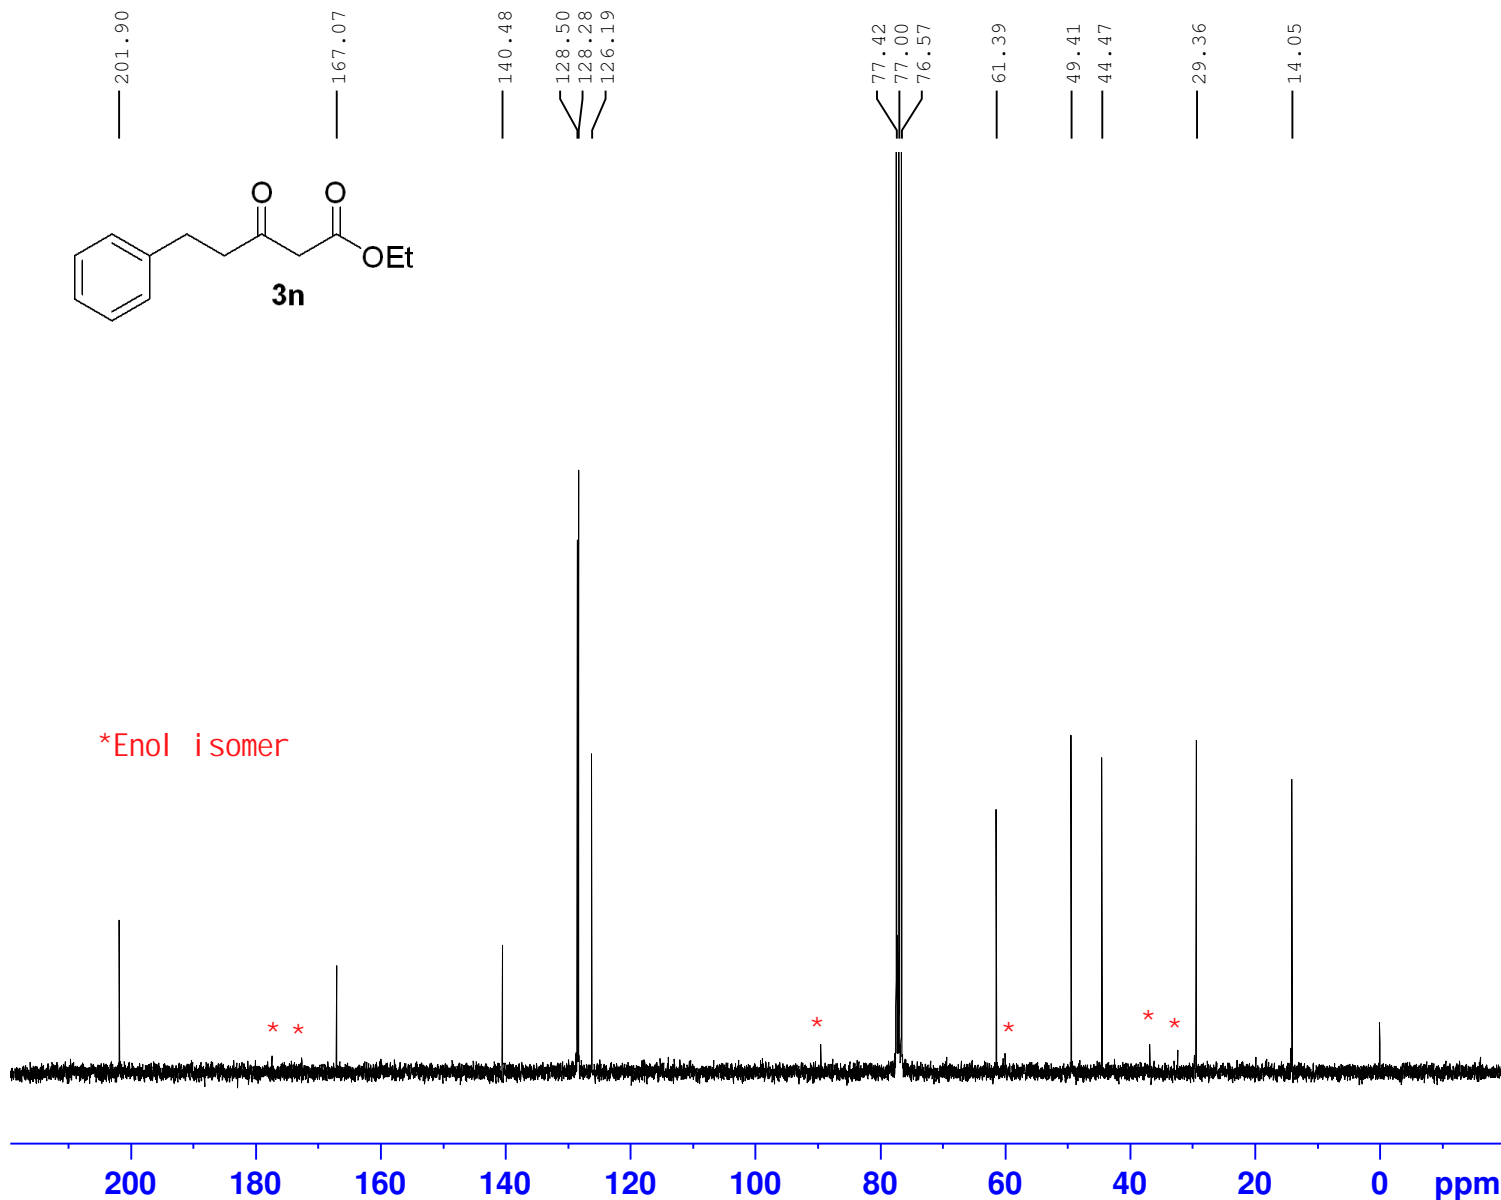

\*Enol isomer

3sjwei 2773 zty-5-13c 1h cdcl3



Current Data Parameters  
NAME ZTY-5-13c-h-fr  
EXPNO 1  
PROCNO 1

F2 - Acquisition Parameters  
Date\_ 20210330  
Time 1.52  
INSTRUM spect  
PROBHD 5 mm PABBO BB-  
PULPROG zg30  
TD 65536  
SOLVENT CDC13  
NS 16  
DS 2  
SWH 6009.615 Hz  
FIDRES 0.091699 Hz  
AQ 5.4525952 sec  
RG 114  
DW 83.200 usec  
DE 6.50 usec  
TE 296.2 K  
D1 1.00000000 sec  
TD0 1

==== CHANNEL f1 =====  
SFO1 300.1318534 MHz  
NUC1 1H  
P1 10.00 usec  
PLW1 14.00000000 W

F2 - Processing parameters  
SI 65536  
SF 300.1300071 MHz  
WDW EM  
SSB 0  
LB 0.30 Hz  
GB 0  
PC 1.00

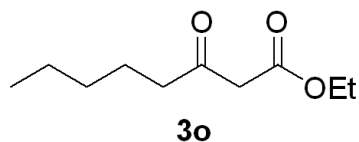

\*Enol isomer

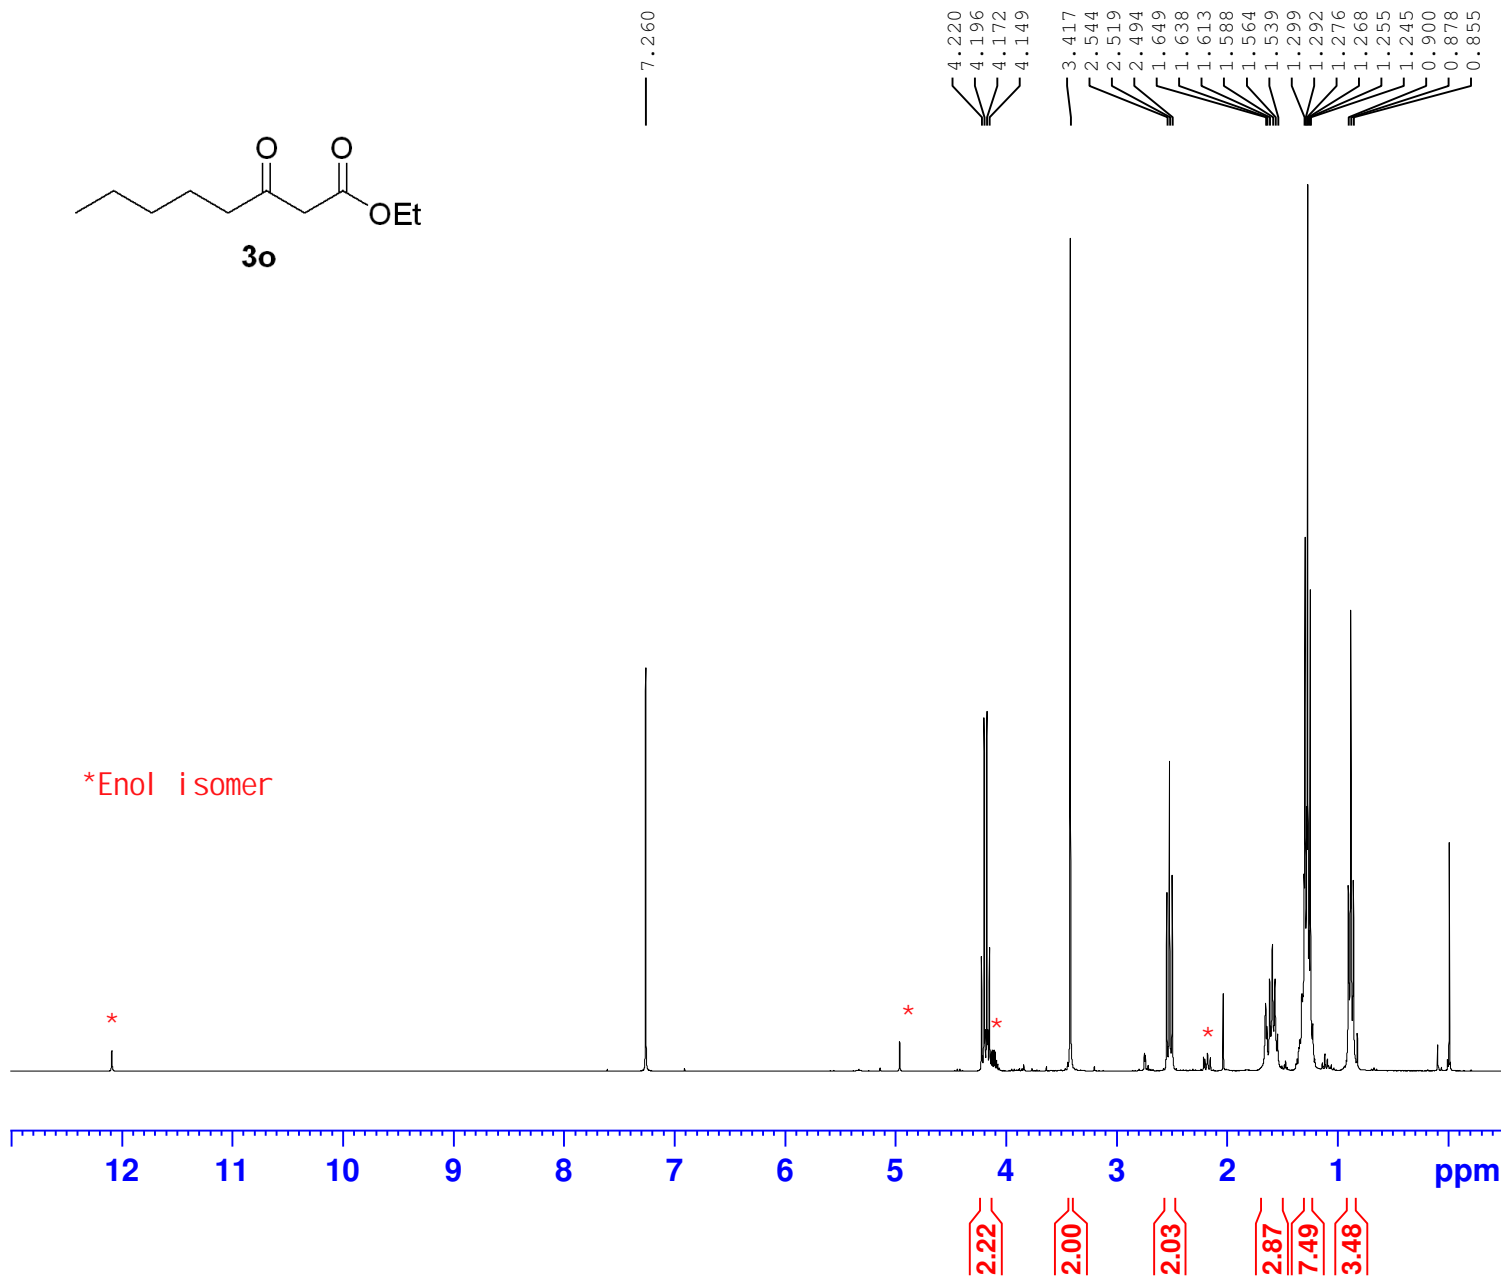

3sjwei 2774 zty-5-13c 13c cdcl3

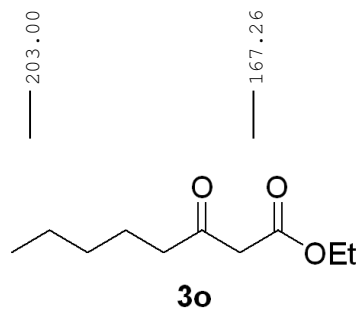

77.42  
77.00  
76.57

61.30

49.28

42.97

31.13

23.10  
22.36

14.06  
13.84

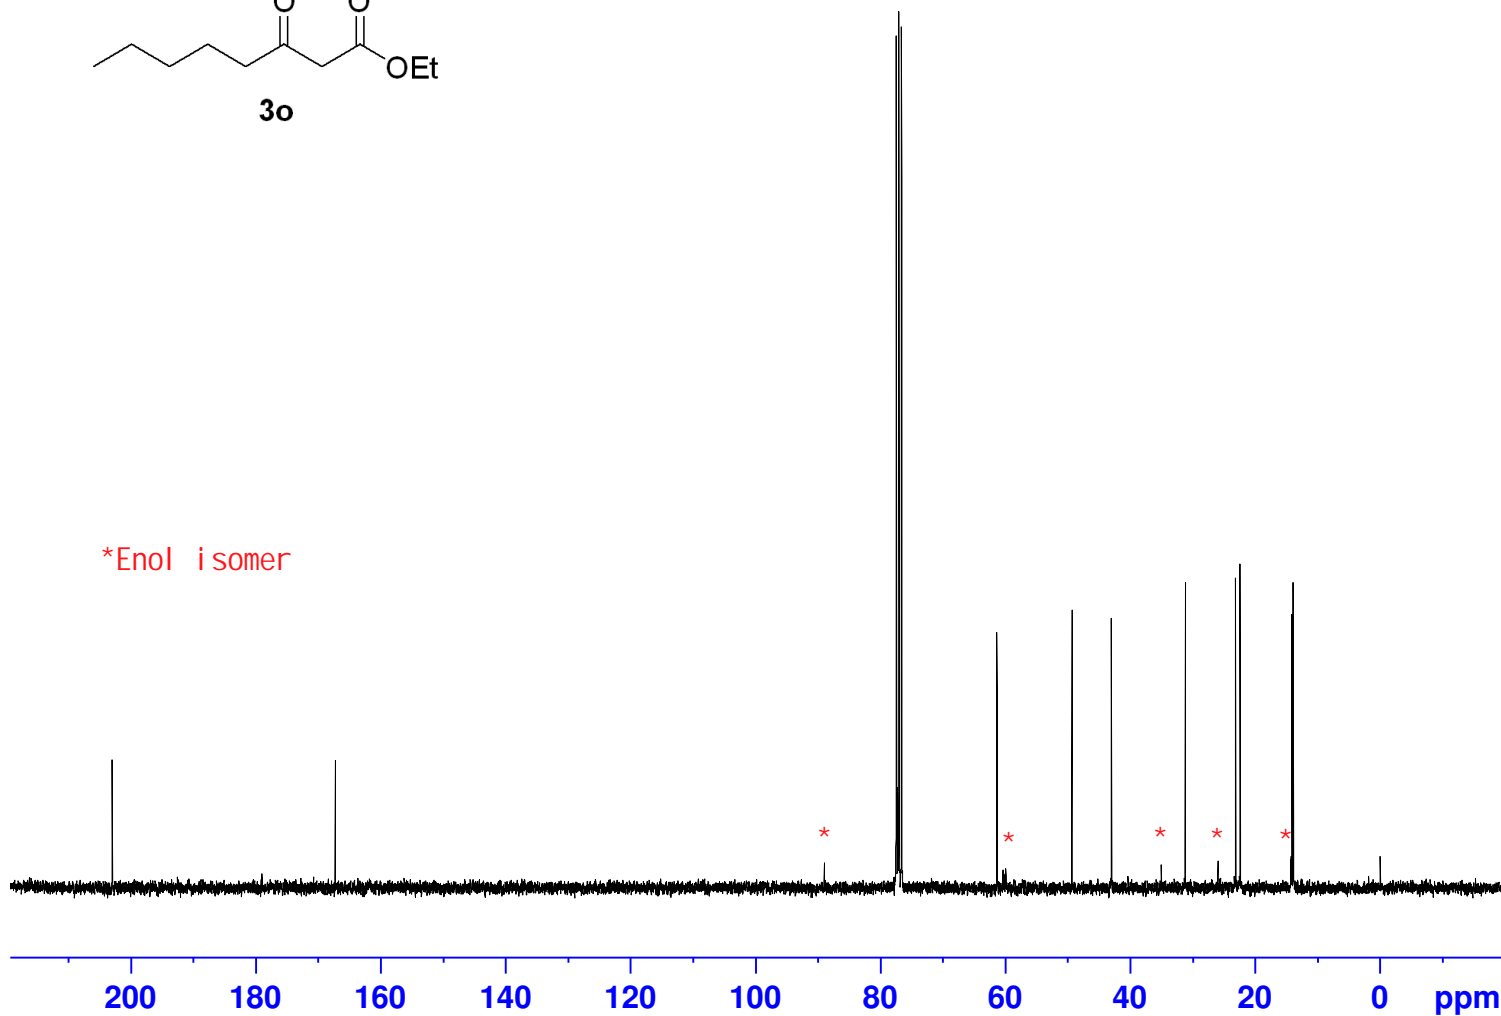

Current Data Parameters  
NAME ZTY-5-13c-c-fr  
EXPNO 1  
PROCNO 1

F2 - Acquisition Parameters  
Date\_ 20210330  
Time 2.45  
INSTRUM spect  
PROBHD 5 mm PABBO BB-  
PULPROG zgpg30  
TD 65536  
SOLVENT CDCl3  
NS 800  
DS 4  
SWH 18028.846 Hz  
FIDRES 0.275098 Hz  
AQ 1.8175317 sec  
RG 203  
DW 27.733 usec  
DE 6.50 usec  
TE 296.2 K  
D1 2.00000000 sec  
D11 0.03000000 sec  
TD0 1

=====  
CHANNEL f1  
SFO1 75.4752949 MHz  
NUC1 13C  
P1 9.50 usec  
PLW1 34.20000076 W

=====  
CHANNEL f2  
SFO2 300.1312005 MHz  
NUC2 1H  
CPDPRG[2] waltz16  
PCPD2 90.00 usec  
PLW2 14.00000000 W  
PLW12 0.17284000 W  
PLW13 0.14000000 W

F2 - Processing parameters  
SI 32768  
SF 75.4677514 MHz  
WDW EM  
SSB 0  
LB 1.00 Hz  
GB 0  
PC 1.40

3sjwei 5437 yzk-3-6-fr 1h cdcl3



Current Data Parameters  
NAME 5437a  
EXPNO 5437  
PROCNO 1

F2 - Acquisition Parameters  
Date\_ 20210927  
Time 10.03  
INSTRUM spect  
PROBHD 5 mm PABBO BB-  
PULPROG zg30  
TD 65536  
SOLVENT CDC13  
NS 16  
DS 2  
SWH 6009.615 Hz  
FIDRES 0.091699 Hz  
AQ 5.4525952 sec  
RG 71.8  
DW 83.200 usec  
DE 6.50 usec  
TE -59.1 K  
D1 1.00000000 sec  
TD0 1

==== CHANNEL f1 =====  
SFO1 300.1318534 MHz  
NUC1 1H  
P1 10.00 usec  
PLW1 14.00000000 W

F2 - Processing parameters  
SI 65536  
SF 300.1300068 MHz  
WDW EM  
SSB 0  
LB 0.30 Hz  
GB 0  
PC 1.00

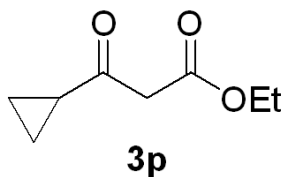

\*Enol isomer

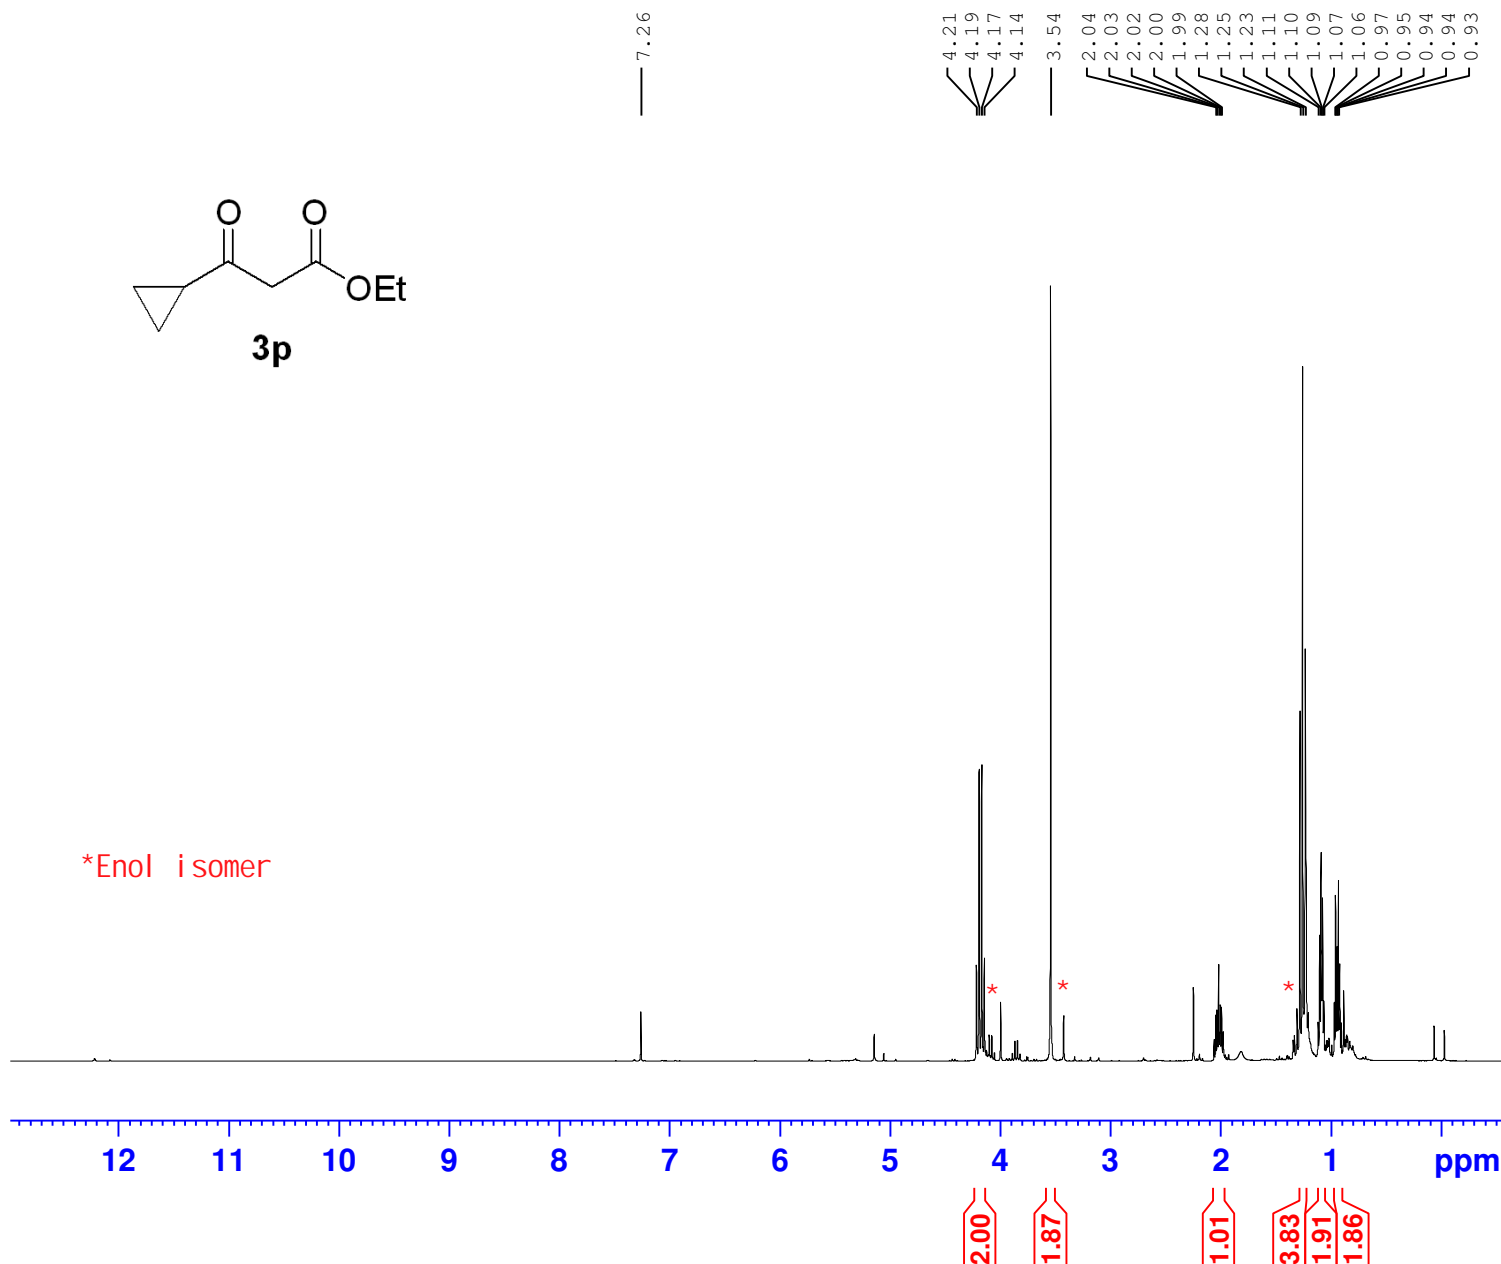

3sjwei 5451 yzk-3-6-fr 13c cdcl3



Current Data Parameters  
NAME 5451a  
EXPNO 5451  
PROCNO 1

F2 - Acquisition Parameters  
Date\_ 20210928  
Time 10.32  
INSTRUM spect  
PROBHD 5 mm PABBO BB-  
PULPROG zgpg30  
TD 65536  
SOLVENT CDC13  
NS 500  
DS 4  
SWH 18028.846 Hz  
FIDRES 0.275098 Hz  
AQ 1.8175317 sec  
RG 203  
DW 27.733 usec  
DE 6.50 usec  
TE -59.1 K  
D1 2.00000000 sec  
D11 0.03000000 sec  
TD0 1

=====  
CHANNEL f1  
SFO1 75.4752949 MHz  
NUC1 13C  
P1 9.50 usec  
PLW1 34.20000076 W

=====  
CHANNEL f2  
SFO2 300.1312005 MHz  
NUC2 1H  
CPDPRG[2] waltz16  
PCPD2 90.00 usec  
PLW2 14.00000000 W  
PLW12 0.17284000 W  
PLW13 0.14000000 W

F2 - Processing parameters  
SI 32768  
SF 75.4677544 MHz  
WDW EM  
SSB 0  
LB 1.00 Hz  
GB 0  
PC 1.40

202.84

167.18

77.42  
77.00  
76.57

61.22

49.90

20.68

14.01

11.62

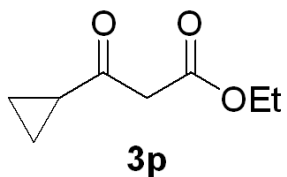

\*Enol isomer

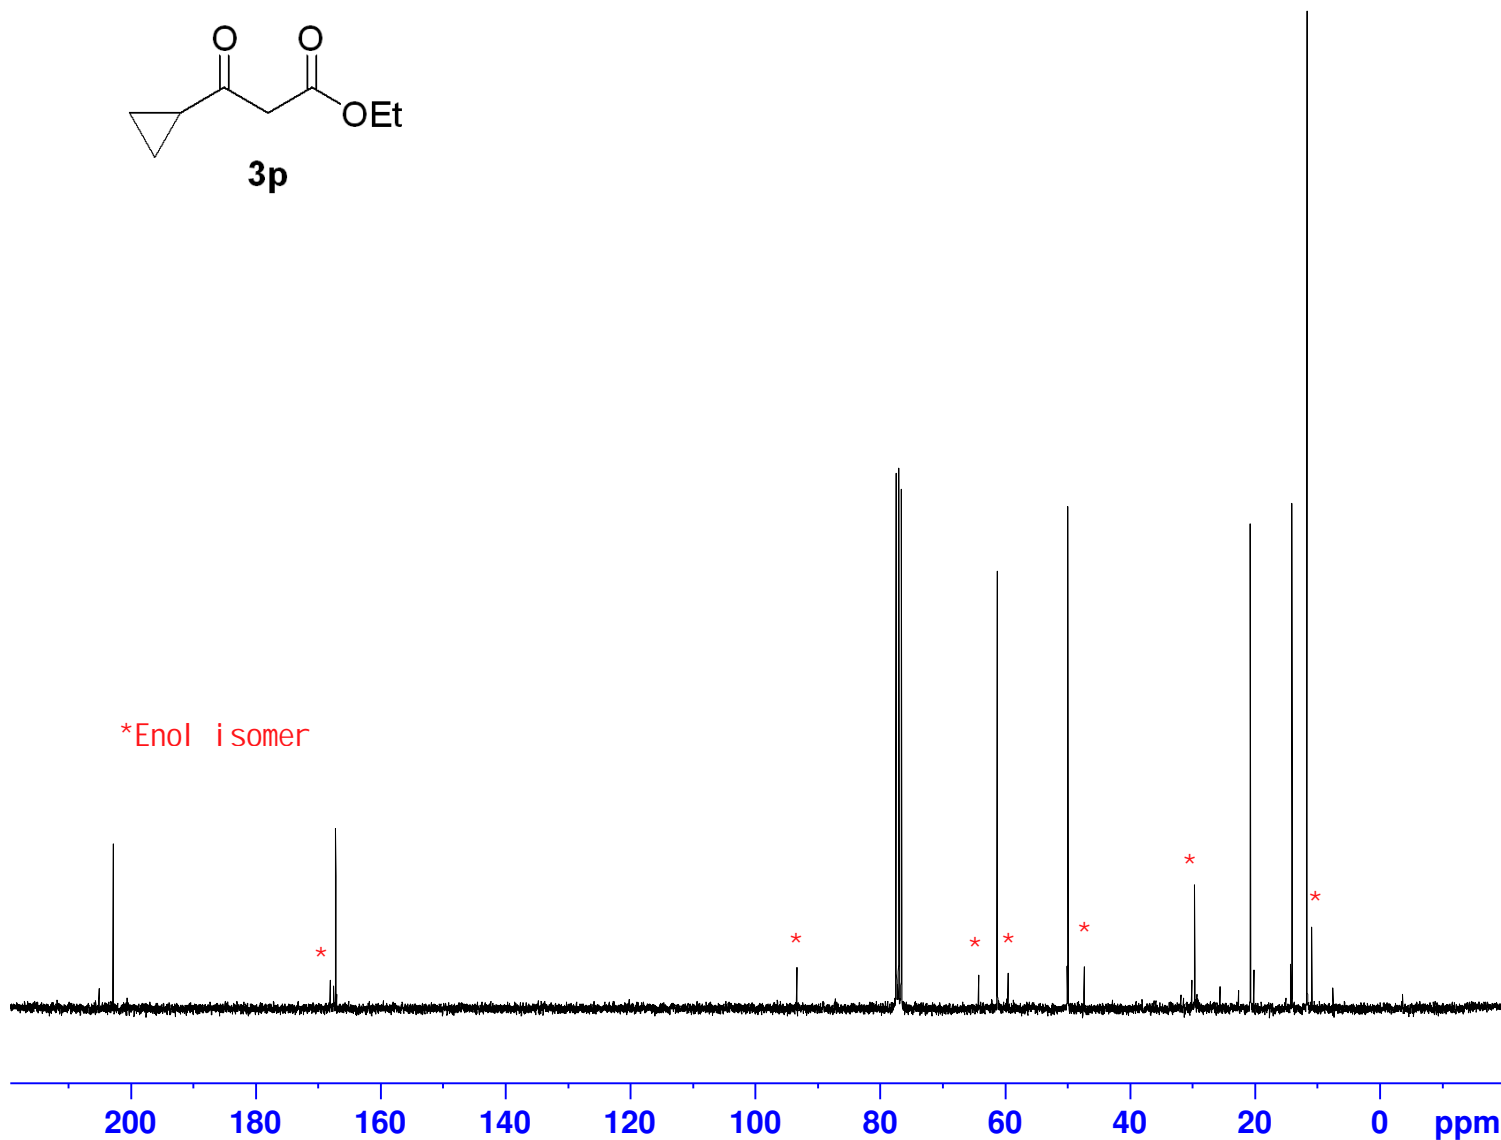



3sjwei 5436 yzk-3-5-fr 1h cdcl3

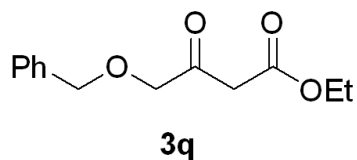

\*Enol isomer

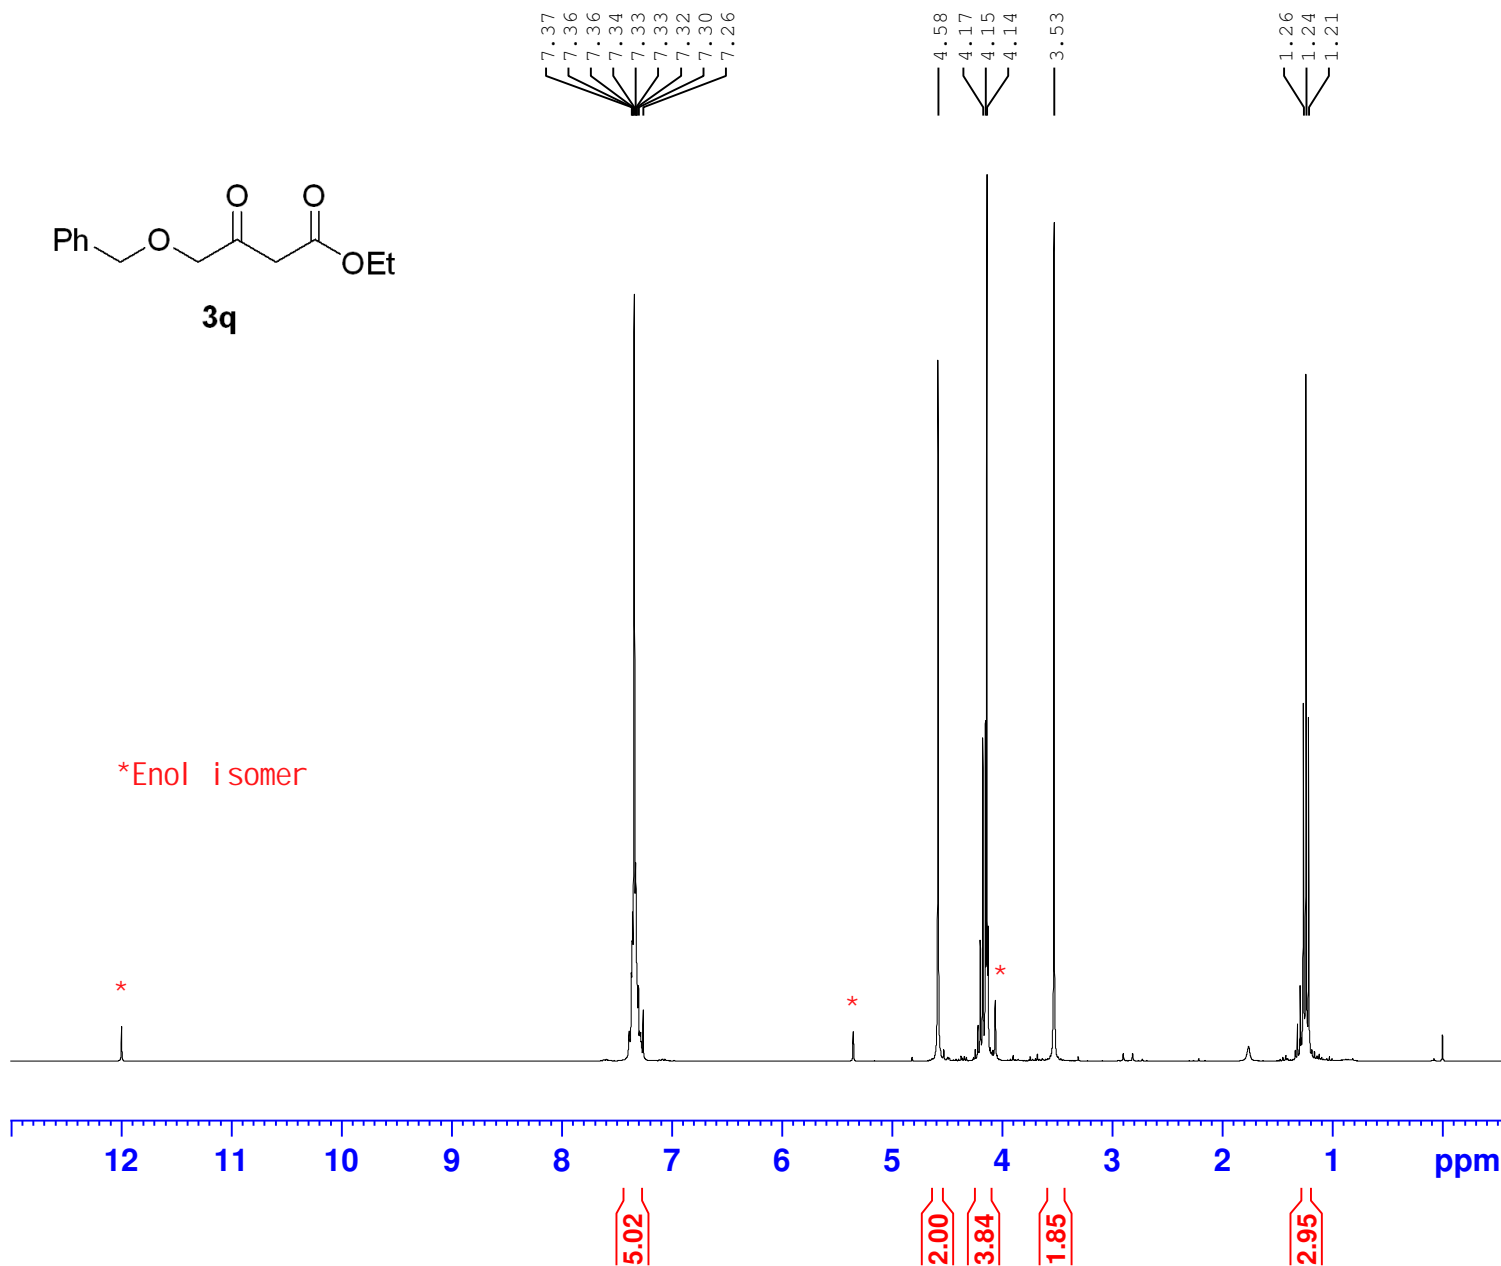

Current Data Parameters  
NAME 5436a  
EXPNO 5436  
PROCNO 1

F2 - Acquisition Parameters  
Date\_ 20210927  
Time 9.58  
INSTRUM spect  
PROBHD 5 mm PABBO BB-  
PULPROG zg30  
TD 65536  
SOLVENT CDC13  
NS 16  
DS 2  
SWH 6009.615 Hz  
FIDRES 0.091699 Hz  
AQ 5.4525952 sec  
RG 64  
DW 83.200 usec  
DE 6.50 usec  
TE -59.1 K  
D1 1.00000000 sec  
TD0 1

==== CHANNEL f1 =====  
SFO1 300.1318534 MHz  
NUC1 1H  
P1 10.00 usec  
PLW1 14.00000000 W

F2 - Processing parameters  
SI 65536  
SF 300.1300067 MHz  
WDW EM  
SSB 0  
LB 0.30 Hz  
GB 0  
PC 1.00

3sjwei 5452 yzk-3-5-fr 13c cdcl3



Current Data Parameters  
NAME 5452a  
EXPNO 5452  
PROCNO 1

F2 - Acquisition Parameters  
Date\_ 20210928  
Time 11.08  
INSTRUM spect  
PROBHD 5 mm PABBO BB-  
PULPROG zgpg30  
TD 65536  
SOLVENT CDC13  
NS 500  
DS 4  
SWH 18028.846 Hz  
FIDRES 0.275098 Hz  
AQ 1.8175317 sec  
RG 203  
DW 27.733 usec  
DE 6.50 usec  
TE -59.1 K  
D1 2.00000000 sec  
D11 0.03000000 sec  
TD0 1

==== CHANNEL f1 =====  
SFO1 75.4752949 MHz  
NUC1 13C  
P1 9.50 usec  
PLW1 34.20000076 W

==== CHANNEL f2 =====  
SFO2 300.1312005 MHz  
NUC2 1H  
CPDPRG[2] waltz16  
PCPD2 90.00 usec  
PLW2 14.00000000 W  
PLW12 0.17284000 W  
PLW13 0.14000000 W

F2 - Processing parameters  
SI 32768  
SF 75.4677580 MHz  
WDW EM  
SSB 0  
LB 1.00 Hz  
GB 0  
PC 1.40

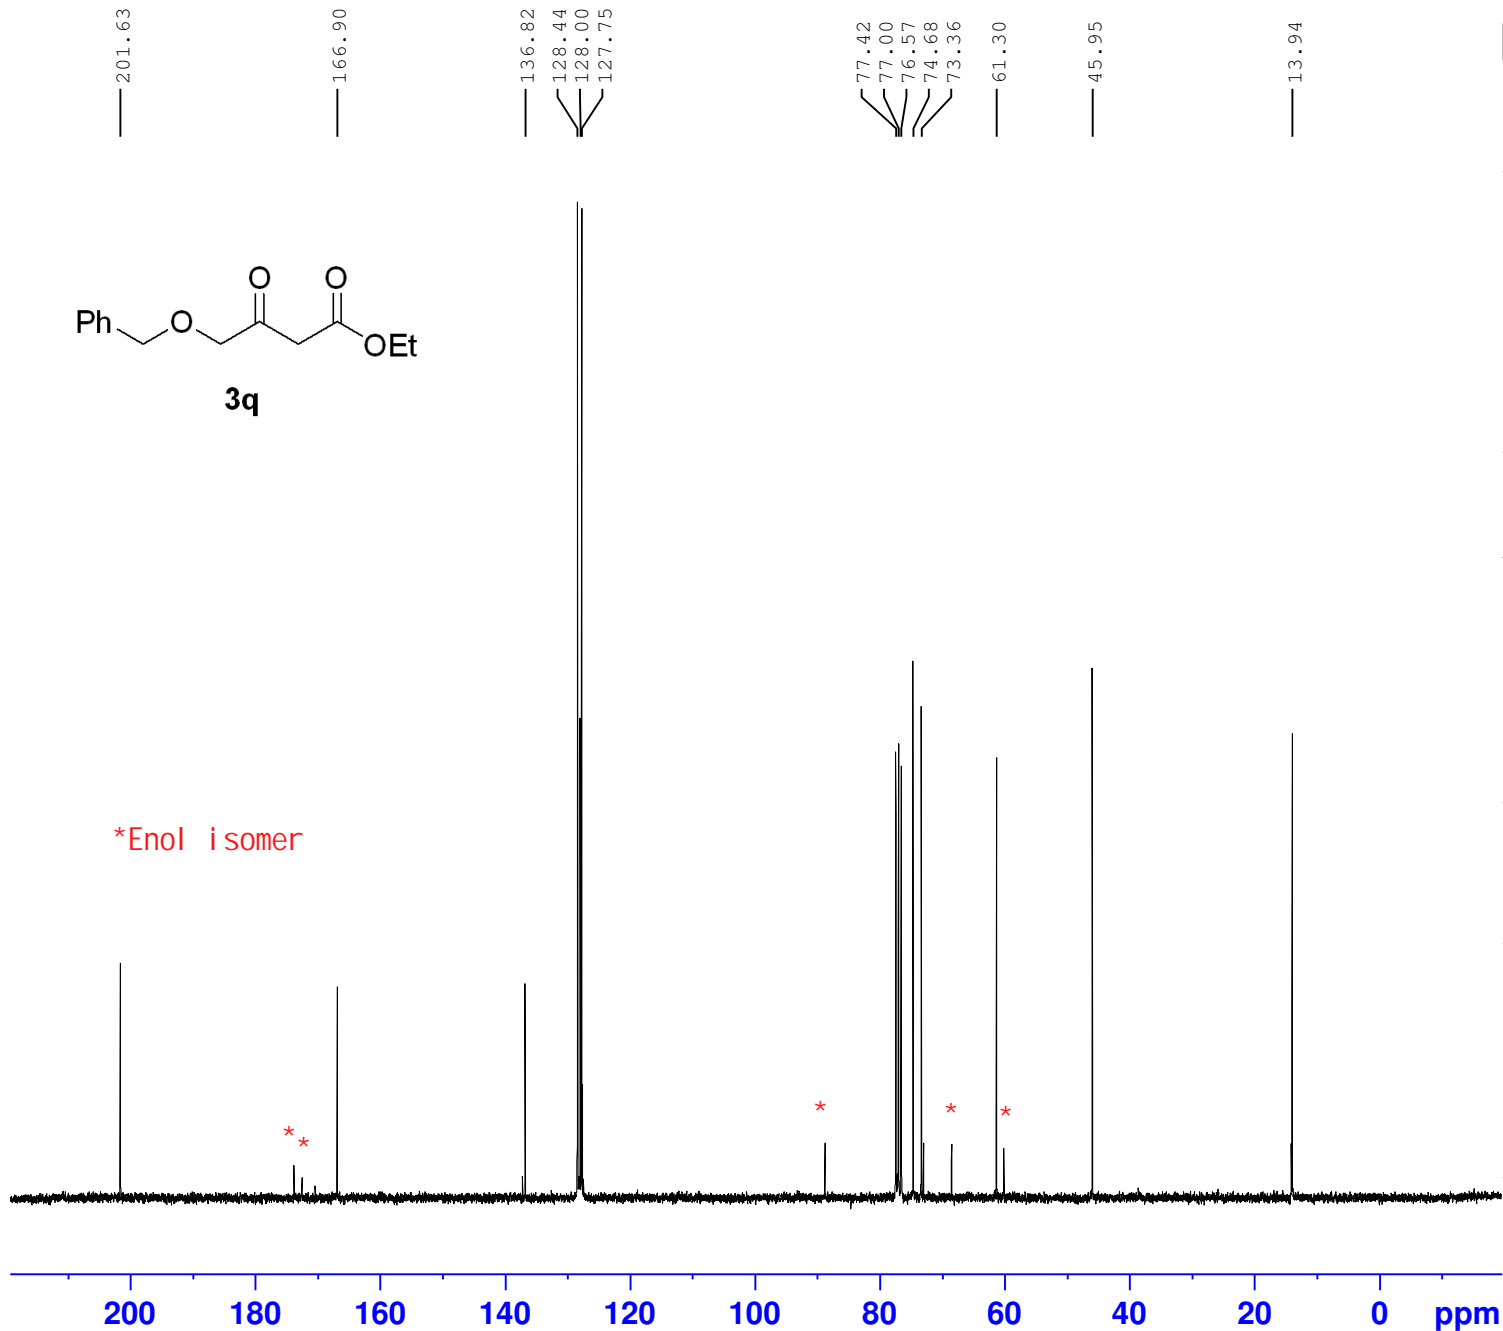

3sjwei 1761 zty-5-7b 1h cdcl3

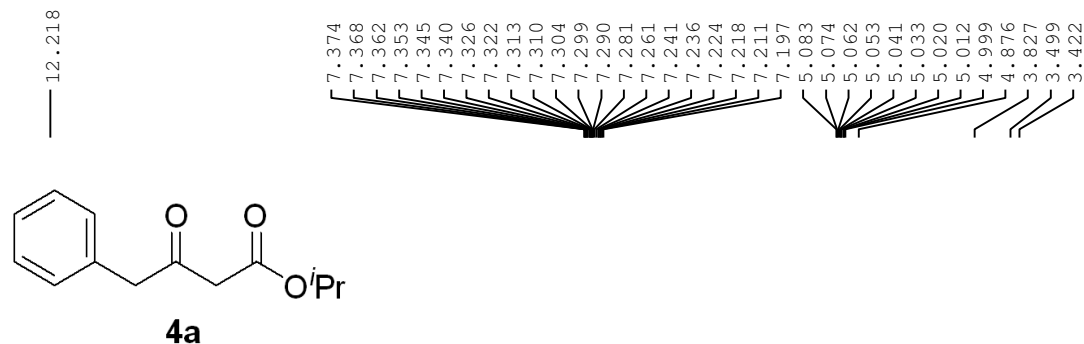

Current Data Parameters  
NAME ZTY-5-7b-h-fr  
EXPNO 1  
PROCNO 1

F2 - Acquisition Parameters  
Date\_ 20201110  
Time 20.07  
INSTRUM spect  
PROBHD 5 mm PABBO BB-  
PULPROG zg30  
TD 65536  
SOLVENT CDC13  
NS 16  
DS 2  
SWH 6009.615 Hz  
FIDRES 0.091699 Hz  
AQ 5.4525952 sec  
RG 144  
DW 83.200 usec  
DE 6.50 usec  
TE 304.5 K  
D1 1.00000000 sec  
TD0 1

==== CHANNEL f1 =====  
SFO1 300.1318534 MHz  
NUC1 1H  
P1 10.00 usec  
PLW1 14.00000000 W

F2 - Processing parameters  
SI 65536  
SF 300.1300071 MHz  
WDW EM  
SSB 0  
LB 0.30 Hz  
GB 0  
PC 1.00

\*Enol isomer

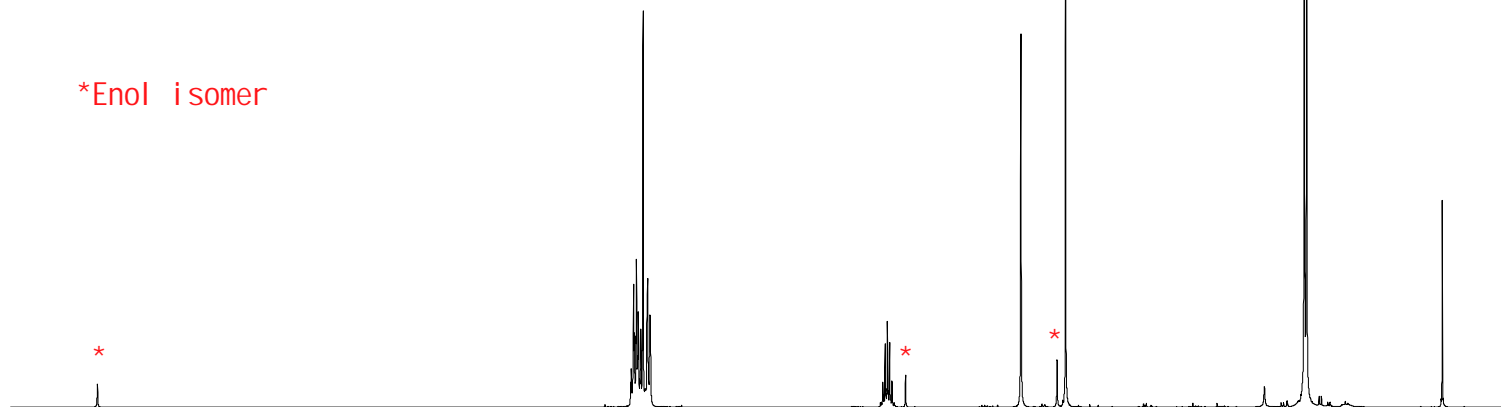

12 11 10 9 8 7 6 5 4 3 2 1 ppm

3.18  
1.98  
1.07  
1.99  
2.00  
7.05

3sjwei 2395 zty-5-7b 13c cdcl3



Current Data Parameters  
NAME ZTY-5-7b-c-fr  
EXPNO 1  
PROCNO 1

F2 - Acquisition Parameters  
Date\_ 20210105  
Time 13.54  
INSTRUM spect  
PROBHD 5 mm PABBO BB-  
PULPROG zgpg30  
TD 65536  
SOLVENT CDCl3  
NS 650  
DS 4  
SWH 18028.846 Hz  
FIDRES 0.275098 Hz  
AQ 1.8175317 sec  
RG 203  
DW 27.733 usec  
DE 6.50 usec  
TE 290.5 K  
D1 2.00000000 sec  
D11 0.03000000 sec  
TD0 1

=====  
CHANNEL f1  
SFO1 75.4752949 MHz  
NUC1 13C  
P1 9.50 usec  
PLW1 34.20000076 W

=====  
CHANNEL f2  
SFO2 300.1312005 MHz  
NUC2 1H  
CPDPRG[2] waltz16  
PCPD2 90.00 usec  
PLW2 14.00000000 W  
PLW12 0.17284000 W  
PLW13 0.14000000 W

F2 - Processing parameters  
SI 32768  
SF 75.4677536 MHz  
WDW EM  
SSB 0  
LB 1.00 Hz  
GB 0  
PC 1.40

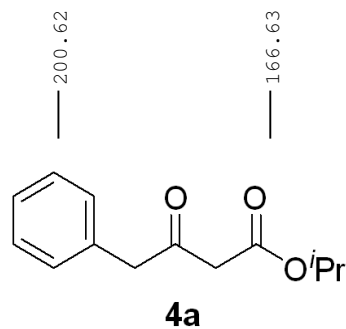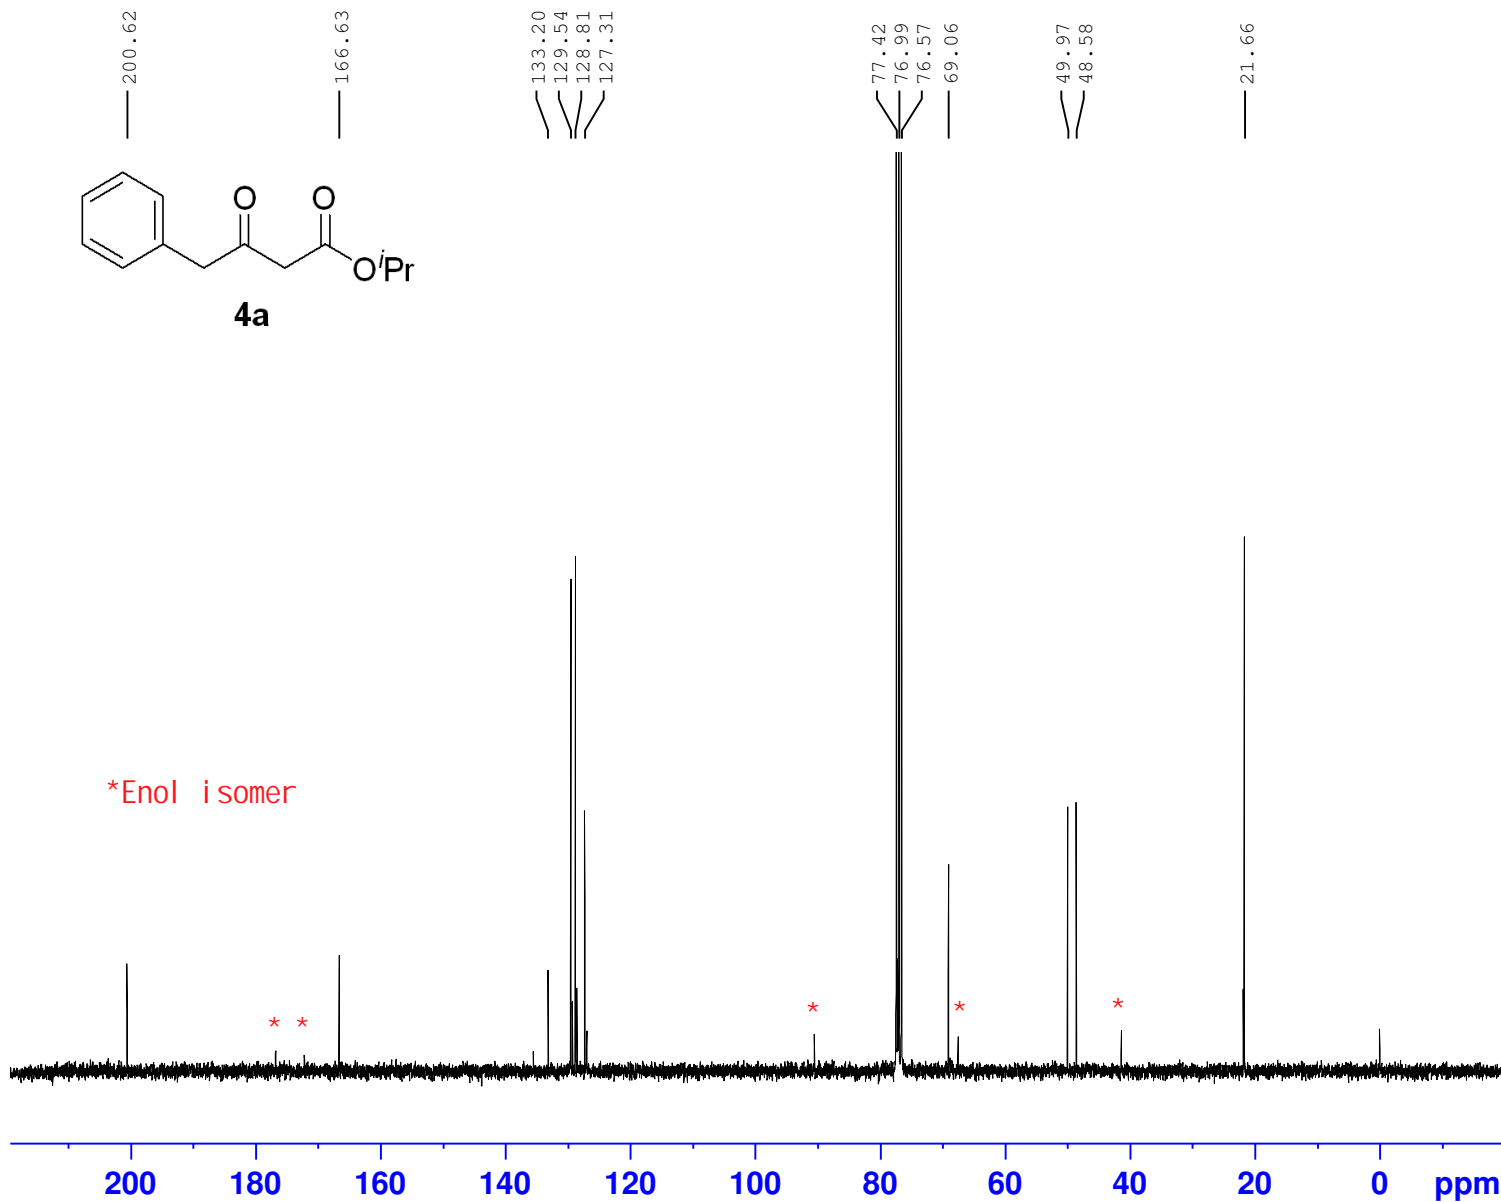

\*Enol isomer

3sjwei 1463 zty-5-6b 1h cdcl3



Current Data Parameters  
NAME ZTY-5-6b-h-fr  
EXPNO 1  
PROCNO 1

F2 - Acquisition Parameters  
Date\_ 20201024  
Time 18.09  
INSTRUM spect  
PROBHD 5 mm PABBO BB-  
PULPROG zg30  
TD 65536  
SOLVENT CDC13  
NS 16  
DS 2  
SWH 6009.615 Hz  
FIDRES 0.091699 Hz  
AQ 5.4525952 sec  
RG 203  
DW 83.200 usec  
DE 6.50 usec  
TE 293.4 K  
D1 1.00000000 sec  
TD0 1

==== CHANNEL f1 =====  
SFO1 300.1318534 MHz  
NUC1 1H  
P1 10.00 usec  
PLW1 14.00000000 W

F2 - Processing parameters  
SI 65536  
SF 300.1300074 MHz  
WDW EM  
SSB 0  
LB 0.30 Hz  
GB 0  
PC 1.00

12.058

7.401  
7.383  
7.374  
7.366  
7.359  
7.354  
7.344  
7.334  
7.324  
7.316  
7.310  
7.304  
7.297  
7.292  
7.286  
7.276  
7.260  
7.187  
7.180  
7.173  
7.160  
7.155  
5.154  
4.972

3.810  
3.518  
3.502

2.255

1.586

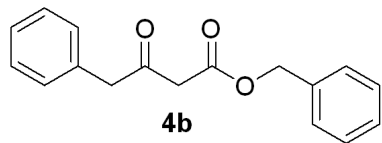

\*Enol isomer

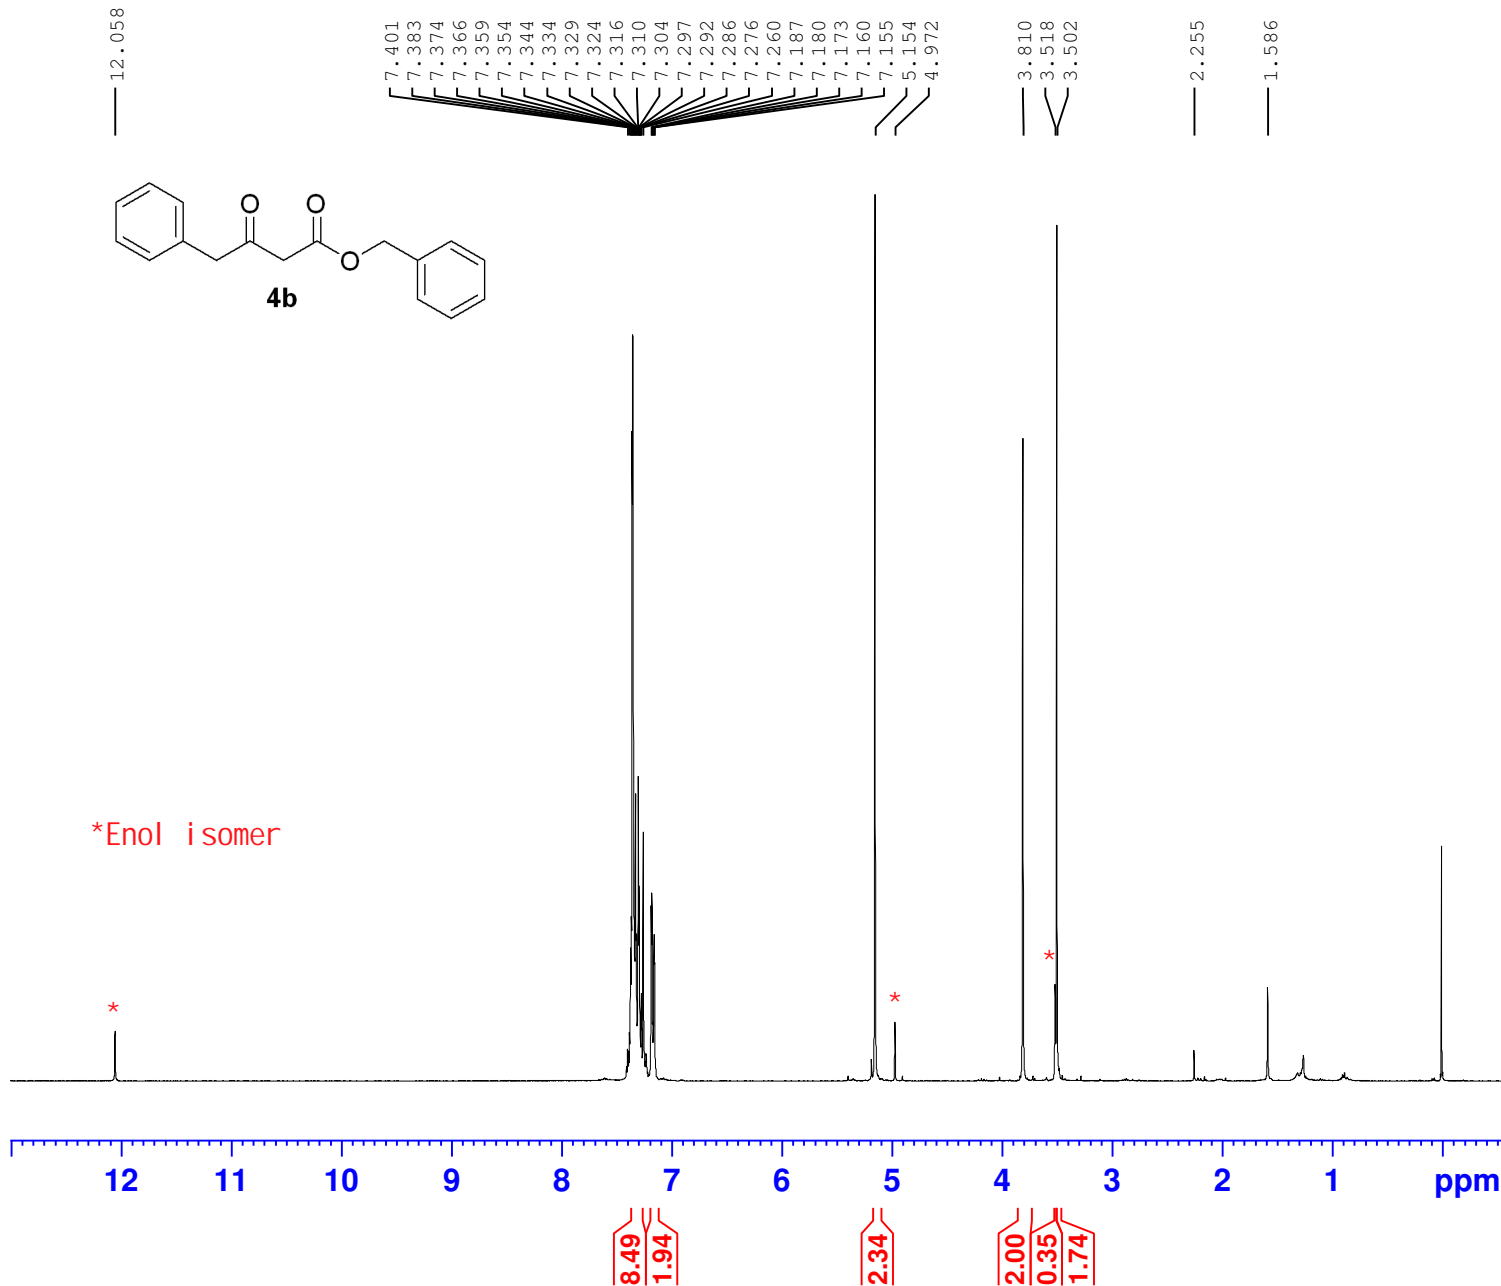

3sjwei 2396 zty-5-6b 13c cdcl3

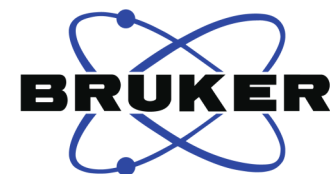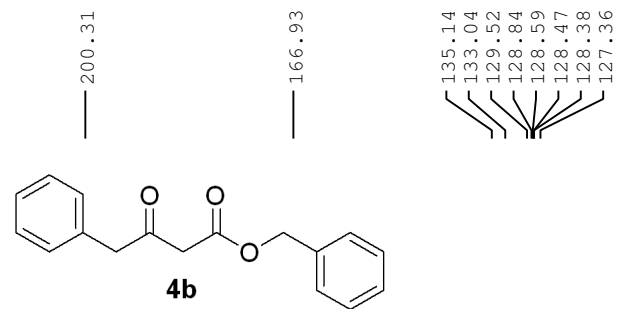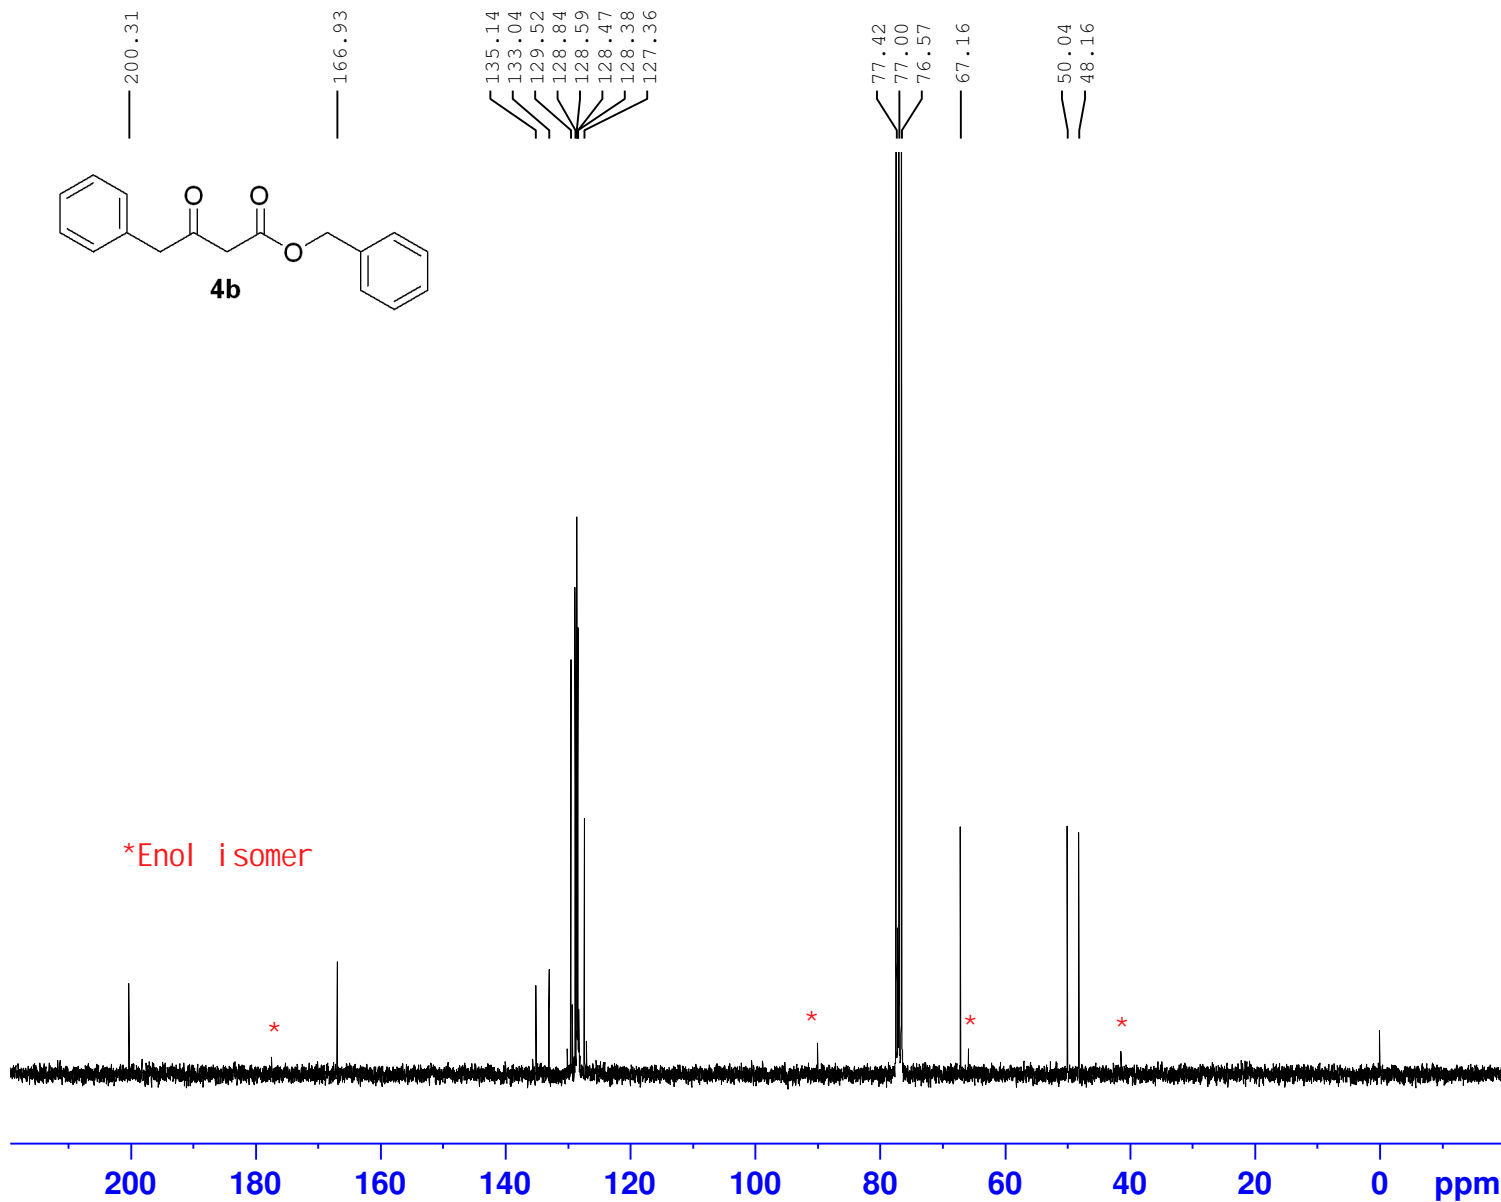

Current Data Parameters  
NAME ZTY-5-6b-c-fr  
EXPNO 1  
PROCNO 1

F2 - Acquisition Parameters  
Date\_ 20210105  
Time 14.40  
INSTRUM spect  
PROBHD 5 mm PABBO BB-  
PULPROG zgpg30  
TD 65536  
SOLVENT CDC13  
NS 650  
DS 4  
SWH 18028.846 Hz  
FIDRES 0.275098 Hz  
AQ 1.8175317 sec  
RG 203  
DW 27.733 usec  
DE 6.50 usec  
TE 290.6 K  
D1 2.00000000 sec  
D11 0.03000000 sec  
TD0 1

=====  
CHANNEL f1  
SFO1 75.4752949 MHz  
NUC1 13C  
P1 9.50 usec  
PLW1 34.20000076 W

=====  
CHANNEL f2  
SFO2 300.1312005 MHz  
NUC2 1H  
CPDPRG[2] waltz16  
PCPD2 90.00 usec  
PLW2 14.00000000 W  
PLW12 0.17284000 W  
PLW13 0.14000000 W

F2 - Processing parameters  
SI 32768  
SF 75.4677541 MHz  
WDW EM  
SSB 0  
LB 1.00 Hz  
GB 0  
PC 1.40
